# Supplementary material for: Scanning the horizon: a systematic literature review of methodologies
Source: PubMed Central journal article supplement — BMJ Open. 2019 May 27;9(5):e026764. doi: 10.1136/bmjopen-2018-026764 (PMC6549743; doi:10.1136/bmjopen-2018-026764), 2019-05-27
Supplement: bmjopen-2018-026764.draft_revisions.pdf [file bmjopen-2018-026764.draft_revisions.pdf]

# BMJ Open

BMJ Open is committed to open peer review. As part of this commitment we make the peer review history of every article we publish publicly available.

When an article is published we post the peer reviewers' comments and the authors' responses online. We also post the versions of the paper that were used during peer review. These are the versions that the peer review comments apply to.

The versions of the paper that follow are the versions that were submitted during the peer review process. They are not the versions of record or the final published versions. They should not be cited or distributed as the published version of this manuscript.

BMJ Open is an open access journal and the full, final, typeset and author-corrected version of record of the manuscript is available on our site with no access controls, subscription charges or pay-per-view fees (<http://bmjopen.bmj.com>).

If you have any questions on BMJ Open's open peer review process please email [info.bmjopen@bmj.com](mailto:info.bmjopen@bmj.com)

# BMJ Open

## Scanning the horizon: A systematic literature review of methodologies

|                               |                                                                                                                                                                                                                                                                                                                                                                                  |
|-------------------------------|----------------------------------------------------------------------------------------------------------------------------------------------------------------------------------------------------------------------------------------------------------------------------------------------------------------------------------------------------------------------------------|
| Journal:                      | <i>BMJ Open</i>                                                                                                                                                                                                                                                                                                                                                                  |
| Manuscript ID                 | bmjopen-2018-026764                                                                                                                                                                                                                                                                                                                                                              |
| Article Type:                 | Research                                                                                                                                                                                                                                                                                                                                                                         |
| Date Submitted by the Author: | 24-Sep-2018                                                                                                                                                                                                                                                                                                                                                                      |
| Complete List of Authors:     | Hines, Philip; United Nations University-Maastricht Economic and social Research institute on Innovation and Technology; European Medicines Agency, SciRS<br>Hui yu, Li; European Medicines Agency, SciRS<br>Guy, Richard; University of Bath - Department of Pharmacy and Pharmacology; European Medicines Agency, SciRS<br>Papaluca, Marisa ; European Medicines Agency, SciRS |
| Keywords:                     | HEALTH SERVICES ADMINISTRATION & MANAGEMENT, EDUCATION & TRAINING (see Medical Education & Training), PUBLIC HEALTH, QUALITATIVE RESEARCH                                                                                                                                                                                                                                        |
|                               |                                                                                                                                                                                                                                                                                                                                                                                  |

SCHOLARONE™  
Manuscripts

Peer Review Only

# Scanning the horizon: A systematic literature review of methodologies

## Authors:

Philip Hines<sup>1\*</sup>,

Li hui yu<sup>2</sup>,

Richard Guy<sup>3</sup>

Marisa Papaluca<sup>4</sup>

1 UNU-MERIT, Maastricht, Netherlands;  
Scientific Committees Regulatory Science Strategy, the European Medicines Agency, 30  
Churchill Place, Canary Wharf, London E14 5EU, United Kingdom, London, UK;  
Email: [Philip.hines@ema.europa.eu](mailto:Philip.hines@ema.europa.eu);  
Telephone: +442036606048

2 Maastricht University, Maastricht, Netherlands; Scientific Committees Regulatory Science  
Strategy, the European Medicines Agency, London, UK

3 University of Bath, UK; Scientific Committees Regulatory Science Strategy, the European  
Medicines Agency, London, UK

4 Scientific Committees Regulatory Science Strategy, the European Medicines Agency,  
London, UK

\*Corresponding author

**Word count:** 3978

## ABSTRACT

**Objectives:** Society is confronted with the rapid emergence of innovation in science and technology. To manage this, horizon scanning is being adopted globally to identify, assess and prioritise innovations and trends at an early stage of their development. This enables decision-makers to be better informed and prepare for change. The aim of this paper is to systematically identify and evaluate HS methodologies employed in healthcare and elsewhere.

**Methods and Results:** A systematic literature review was performed using PUBMED and EMBASE, and was supplemented with grey literature searches. The principal methodologies used in horizon scanning were extracted from approximately 100 articles, and were summarised in a literature map. The search revealed many examples of horizon scanning across disciplines. Challenges, such as the need to refine prioritisation criteria, manage uncertainty inherent in the findings, and improve the dissemination of identified issues, have been highlighted.

**Conclusion:** Horizon scanning, when performed appropriately, is a flexible and reliable tool. When used for the early identification of trends, horizon scanning can inform and influence decision-making, leverage opportunities and address challenges at an international level. Further research to identify the most effective methodologies available would add depth to this landscape and enable the evolution of best practice to most efficiently anticipate novel developments and innovations.

## Strengths and limitations of this study

- This systematic review offers an up-to-date perspective on horizon scanning methodologies – incorporating practices from beyond the health field; however, as reviews into horizon scanning in healthcare have been undertaken previously, some duplication of findings was inevitable.(1-5)
- Resource limitations have precluded evaluation of horizon-scanning in all sectors, particularly in the private sector, and consideration of material in languages other than English and Italian.
- The paper may be subject to outcome bias as the papers reported systematic methodological aspects of horizon scanning; therefore, some ad-hoc horizon scanning methods may not be captured.

# INTRODUCTION

Across organizations worldwide, the rapid emergence of high impact innovation is a major challenge faced by decision makers.(6) To respond, the identification of future innovations and trends is being undertaken in a comprehensive, systematic and sustainable manner so that policy makers, and other stakeholders, can respond appropriately and enable innovations to reach the market with minimal developmental, legal, regulatory, process or procurement bottle-necks. To catalyse the achievement of this objective, horizon scanning is emerging as a valuable and viable strategy. This is particularly true in the health sector, where the European Medicines Agency (EMA) is seeking to promote the availability of innovative medicines using horizon scanning. This foresight will in turn inform the Agency's Regulatory Science Strategy and the European medicines regulatory network strategy.(7-9)

Horizon scanning has been in use for many years, initially by commercial organisations and later by public bodies; Japan was an early adopter of foresight methodologies in the 1970s.(4, 10) Since then, horizon scanning has been used across diverse sectors to aid financial, policy, process and research planning.(5, 11) There are many definitions of horizon scanning,(12) but most can be captured by its generic characterisation as a systematic examination of information to detect early signs of important developments. The approach generally targets the early lifecycle of technologies – i.e, in an early phase of adoption before their introduction on to the market - but may also scan for broader trends, challenges and opportunities. It provides an early warning of 'signals', rather than a comprehensive study of their impact.

Horizon scanning generally follows a process of signal detection, filtration, prioritisation, assessment and dissemination (Fig 1). Its use is growing across sectors,(13) and this risks the duplication of efforts (both in design and execution) as similar stretches of the horizon are scanned by many.

1  
2  
3  
4  
5  
6 **Fig 1. Common stages of Horizon scanning from the EuroScan network (12).**  
7

8 This figure is licensed under the Creative Commons Attribution-NonCommercial-ShareAlike  
9  
10 4.0 International License (CC BY-NC-SA 4.0)  
11

12  
13 There have been no recent reviews of horizon scanning methods used in the health  
14 sector,(12, 14) or those looking beyond the health sector sectors. As a result, the aim of  
15 this literature review is to systematically identify and evaluate HS methodologies employed  
16 in healthcare and elsewhere. The overall goal is to broaden and update knowledge on the  
17 methodologies used, and through mapping and evaluation, provide a useful guide for the  
18 establishment and optimisation of future horizon scanning initiatives. This includes the  
19 activities of the EMA's recently established Regulatory Science Observatory, as well as the  
20 EU Innovation offices Network and the International Coalition of Medicines Regulatory  
21 Authorities (ICMRA).(9)  
22  
23  
24  
25  
26  
27  
28  
29  
30  
31  
32  
33  
34  
35  
36  
37  
38  
39  
40  
41  
42  
43  
44  
45  
46  
47  
48  
49  
50  
51  
52  
53  
54  
55  
56  
57  
58  
59  
60

## METHODS

A systematic review of the literature was performed to capture and map the use of horizon scanning activity, and the widespread use of modern IT/web capabilities, with 2008 to 2018 chosen accordingly.<sup>(15)</sup> Three researchers were involved and a systematic protocol was followed to minimise inter-rater bias; this involved cross validation between two researchers, with diverging opinions then arbitrated by the third. This systematic approach also permitted gaps and inconsistencies in the field to be identified. Data collection followed the Preferred Reporting Items for Systematic Reviews and Meta-Analyses (PRISMA) guidelines:<sup>(16)</sup> the literature was first screened and filtered using inclusion and exclusion criteria; the accepted papers then underwent data extraction and analysis; and, finally, the scanning methodologies were mapped.

### Search strategy

Medline and Embase bibliographic databases were searched to identify research papers on the use of horizon scanning, and the methods used for this purpose. Grey literature and bibliographies of the most relevant research papers supplemented this search. The primary search terms and relevant MeSH terms used were: “\*horizon scan\*” OR “\*strategic foresight\*” OR “\*systematic early dialogue\*” OR “\*early warning and alert system\*”. All literature, of which the title or abstract contained any of the keywords above, was flagged.

### Inclusion and exclusion criteria

Only articles published in English or Italian from 2008-2018 were included,

In the first round of screening the publication abstracts had to indicate:

- (a) either a methodology for horizon scanning or strategic foresight, *or* a discussion, *or* experience provided, of horizon scanning.



(b) It was also essential for the abstracts to indicate a breadth of horizon scanning of the relevant field level *or* address a methodological aspect which may be generally applicable across different fields.

In the second round, the full texts of the selected articles were then reviewed according to additional inclusion criteria:

- (a) the horizon scan or foresight methodology was detailed, *and*
- (b) the priority areas included relevant science and/or technology, *and*
- (c) a collaborative/international approach was used, *and*
- (d) the horizon scanning undertaken spanned a period of between 2 and 15 years.

*Alternatively*, the paper was required to demonstrate methodological aspect(s) of foresight or horizon scanning of potentially general applicability.

The foresight period of 2-15 years reflected the facts that signals suggesting impact in less than two years obviously concern innovations that are already in late-stage development, while those anticipated to 'mature' in 15-20 years' time are too distant and uncertain to be useful.

The mapping was elaborated using the EuroScan International Information Network method, a scientific association of member organizations and individuals for the exchange of information on important emerging new drugs, devices, procedures, programs, and settings in health care (EuroScan), and novel methodological aspects from the searched literature.(12)

## **Patient and Public Involvement**

The patients and public were not directly involved in the design or conduct of the study.

## RESULTS

There were 413 papers identified through the initial database searches and grey literature, of which 252 were removed due to duplication or failing to meet the inclusion criteria. 60 papers were excluded because of language issues or lack of access to full-text. 101 publications were included in this study after reading the full text as indicated (Fig 2).

### Fig 1. Literature selection process flowchart (16)

Consistency between the selection of papers by the two researchers, who undertook the screening, was fair (Cohen's unweighted Kappa =0.28).(17) A third researcher therefore screened the excluded literature according to the criteria to ensure that all relevant papers were captured (and resulting in one further publication being selected).

Most of the studies included in this review address horizon scanning as whole, following the process outlined in Figure 1, and of these, many operate in a national context. A few papers also focus on the use of specific methodological aspects such as Delphi techniques (see Table 1). Given the databases interrogated, the most prevalent priority areas identified were environmental issues,(12) gene therapy,(8) oncology(9) and clinical practice. Public sector bodies in the UK, USA, Sweden and Australia published the most on the topic. Internationally, EuroScan was repeatedly referenced for its role in harmonizing horizon scanning methodology, supporting its members and encouraging international collaboration.

1  
2  
3 Risk of bias was assessed in accordance with the BMJ guidelines and the Cochrane risk of  
4 bias tool. Most bias were not applicable to these non-clinical qualitative studies, however  
5 the following were:  
6  
7  
8  
9

10  
11 - A form of publication bias was likely in which only horizon scanning undertaken in  
12 organisations with a strong background in publishing academic publications were  
13 discovered. It was not possible to correct for this.  
14  
15  
16

17  
18  
19 - Outcome bias may have occurred as the papers reported systematic methodological  
20 aspects of horizon scanning, whereas some horizon scanning may occur in an ad-hoc  
21 manner e.g. a signal discovered by word of mouth.  
22  
23  
24

25  
26  
27 - The competing interests of the authors were not considered beyond the standards of the  
28 source journals. This was because it was not thought highly relevant to the reporting of  
29 methodologies.  
30  
31  
32

## 33 34 35 **Mapping**

36  
37  
38 The process outlined in the EuroScan Method toolkit was used as a basis and novel  
39 methodological aspects found in the literature added.(12) The resulting map is segmented  
40 into: signal identification and detection, criteria and methods of filtration and prioritization,  
41 assessment, dissemination and updating of information, and overall evaluation of the  
42 process. Notable references are given; the full dataset is provided in supplementary data  
43 file.  
44  
45  
46  
47  
48  
49  
50  
51  
52  
53  
54  
55  
56  
57  
58  
59  
60

## Information sources and signal detection

*For more detailed results, please see the supplementary information.*

Signals are detected from manifold sources in a horizon scanning exercise; Table 1 summarises the most common origins of information.

| <b>Information sources (signal detection)</b>                                                                                                                                                                                                                                                                                                                                                                                                                               |
|-----------------------------------------------------------------------------------------------------------------------------------------------------------------------------------------------------------------------------------------------------------------------------------------------------------------------------------------------------------------------------------------------------------------------------------------------------------------------------|
| <ul style="list-style-type: none"> <li>• Scientific/biomedical literature review</li> <li>• Patents</li> <li>• Input from industry and industry associations</li> <li>• Other observatories</li> <li>• Media</li> <li>• International institutions and forums</li> <li>• Individuals, committees and expert groups</li> <li>• Surveys</li> <li>• Government bodies</li> <li>• Meetings and conferences</li> <li>• Other organisations</li> <li>• Grey literature</li> </ul> |

**Table 1: Information sources used for signal detection in horizon-scanning**

Review of the scientific and biomedical literature is perhaps the most common place to identify innovation. Searches can be structured, using systematic and validated strategies, for broad or targeted topic areas;(18-20) a two-step approach, first to survey the field and, second, for a 'deep dive', can be used. Recently issued patents and published patent applications (e.g., the European Patent Office)(21) represent an alternative source of early

1  
2  
3 signals, particularly of innovations originating in industry (large, medium and small).

4  
5 Systematic and/or *ad hoc* scanning of direct or indirect information about new findings from  
6  
7 industry or industry associations(22, 23) (such as investment of venture capital in SMEs) is  
8  
9 also useful for monitoring of research pipelines. As are, for example, clinical trials  
10  
11 databases(24, 25) and intelligence gathered from research infrastructures and consortia,  
12  
13 and from university and research institute technology transfer offices.  
14  
15

16 Other observatories of potential value include repositories of innovation and trends  
17  
18 generated from the horizon scanning outputs of international regulators and the committees  
19  
20 and expert groups of governmental bodies, such as OECD and EuroScan(26-28). The media  
21  
22 - print, electronic and social - generate substantial topic-specific and commercially-relevant  
23  
24 information, available via RSS feeds(13), Twitter, Facebook, etc.(29) Social media also  
25  
26 allow suggestions of signals from stakeholders. Workshops can also be useful to bring  
27  
28 together diverse experts (chosen on the basis of their area of specialisation, breadth of  
29  
30 knowledge, publications and commitment to the process) to discuss areas of novel science  
31  
32 and technology and to collaboratively scan the horizon from different points of view.(30)  
33  
34 These 'sand-pit' exercises can be supplemented by participants from the scanning  
35  
36 organisation itself, appropriate stakeholder groups, external consultants and policy-  
37  
38 makers.(31, 32) For sustainable and continuous horizon scanning, it may prove valuable to  
39  
40 create a steering committee, think tank or "idea radar" including representatives of the  
41  
42 aforementioned participants.(33, 34)  
43  
44

45 Delphi studies are widely used to pool knowledge and build consensus around emerging  
46  
47 issues. There are two or more rounds involved: in the first, participants identify relevant  
48  
49 issues, which are then pooled and ranked; the second round sees these issues discussed  
50  
51 followed by their re-ranking. This process is iterated until a consensus is reached. Several  
52  
53 Delphi variations have been described, from more conventional workshop formats to the use  
54  
55 of online tools such as Nvivo (quantitative analysis of text) or Wordle.net (a word cloud  
56  
57  
58  
59  
60

1  
2  
3 tool).(35) The design of a Delphi study should take into account the sample size and  
4  
5 confounding factors, such as the level of conformity in the group.(5, 36, 37)  
6

7  
8 Surveys, conducted via the web or by mail,(23, 34) enable staff of an organisation,  
9  
10 stakeholders and the public to be asked to identify new technologies or trends.(38) These  
11  
12 may be most useful when horizon-scanning in well-defined fields.(5) Semi-structured  
13  
14 interviews covering a standard set of questions can also be used, with similar  
15  
16 outcomes.(19) However, public input was not found to be hugely productive.(38) Likewise,  
17  
18 an attempt to establish a Wikipedia community has been largely unsuccessful.(39)  
19

20  
21 Finally, a number of additional sources have been identified including draft legislation and  
22  
23 policy papers from governmental bodies, the proceedings of scientific conferences and  
24  
25 symposia, professional and scientific societies, interest groups, think-tanks and research  
26  
27 funders (government, charities, venture capital, etc.), the so-called grey literature where  
28  
29 global shifts that influence society, the economy and the environment — megatrends —(40)  
30  
31 are sometimes foreseen. Google alert queries, Google Trends, Google News Timeline,  
32  
33 Google Insight, and blogs were mentioned.(39, 41)  
34  
35  
36  
37  
38  
39  
40  
41  
42  
43  
44  
45  
46  
47  
48  
49  
50  
51  
52  
53  
54  
55  
56  
57  
58  
59  
60

## Filtration criteria and methods

*For more detailed and explanatory results, please see the supplementary information.*

Table 2 presents the criteria and methods commonly used to discard irrelevant signals.

| <b>Filtration criteria (discarding irrelevant signals)</b>                                                                                                                                                                                                                                                                                                                                                                                                    | <b>Filtration methods</b>                                                                                                                                                                                            |
|---------------------------------------------------------------------------------------------------------------------------------------------------------------------------------------------------------------------------------------------------------------------------------------------------------------------------------------------------------------------------------------------------------------------------------------------------------------|----------------------------------------------------------------------------------------------------------------------------------------------------------------------------------------------------------------------|
| <ul style="list-style-type: none"> <li>• Potential impact</li> <li>• Size of affected population or global relevance</li> <li>• Novelty</li> <li>• Level of innovation</li> <li>• Evidence</li> <li>• Organisational impact</li> <li>• Plausibility</li> <li>• Levels of stakeholder and media interest</li> <li>• Policy priority</li> <li>• Stage of development</li> <li>• Ethical and social issues</li> <li>• Within time-frame of 2-15 years</li> </ul> | <ul style="list-style-type: none"> <li>• Classification criteria</li> <li>• Automated text-mining tools</li> <li>• Individual and group filtration</li> <li>• Peer review</li> <li>• Expert participation</li> </ul> |

**Table 2: Filtration criteria and methods used in horizon-scanning to discard irrelevant signals**

1  
2  
3 Several key criteria concerning a signal's potential impact were used:(20, 34, 42-44) What  
4 are the costs, and the cost-utility ratio, of resource consumption; what are the implications  
5 in terms of quality of life, burden of disease and patient safety?(44, 45)  
6  
7  
8

9  
10 The level of evidence is a further important criterion that has been ranked using a simple  
11 traffic light system,(46) where green denotes sufficient evidence to support the uptake of  
12 the signal, yellow indicates insufficient evidence to support uptake but the evidence may  
13 constitute useful information, and red implies unsupportive or insufficient evidence.  
14  
15  
16

17  
18 In terms of filtration methods, these may be separated into those which tag signals  
19 according to the criteria in a binary yes/no fashion, or those which use distinct or graduated  
20 categories, e.g., confirmed, likely, potential, unlikely, and questionable.(25) Automated  
21 text-mining tools can be used with databases to enable the identification, tagging and  
22 categorisation of signals and facilitate clustering and filtering.(5) Individual or group  
23 filtration may be performed by organisational staff, who can also undertake, up to point,  
24 peer review that ultimately requires the participation of external experts. The latter can  
25 also be responsible for weighting signals, according to the criteria, using an evidence  
26 framework.(20, 30)  
27  
28  
29  
30  
31  
32  
33  
34  
35  
36  
37  
38  
39  
40  
41  
42  
43  
44  
45  
46  
47  
48  
49  
50  
51  
52  
53  
54  
55  
56  
57  
58  
59  
60



## Prioritisation criteria and methods for assessing signals

*For more detailed and explanatory results, please see the supplementary information.*

The signals which have met the filtration criteria can then be prioritised. The prioritisation criteria which must be met, and the methods used to do so, are collected in Table 3.

| <b>Prioritisation criteria (assessing signals)</b>                                                                                                                                                                                                                                                                                                                                                                                                                           | <b>Prioritisation methods</b>                                                                                                                                                                                                                                                                                                                                                   |
|------------------------------------------------------------------------------------------------------------------------------------------------------------------------------------------------------------------------------------------------------------------------------------------------------------------------------------------------------------------------------------------------------------------------------------------------------------------------------|---------------------------------------------------------------------------------------------------------------------------------------------------------------------------------------------------------------------------------------------------------------------------------------------------------------------------------------------------------------------------------|
| <ul style="list-style-type: none"> <li>• Potential impact on outcomes</li> <li>• Size make-up of the affected population</li> <li>• Expected variation of impact</li> <li>• Likely time-frame</li> <li>• Evidence of effectiveness</li> <li>• Relevance to strategic and political priorities</li> <li>• Effect on other related policies</li> <li>• Desirability</li> <li>• Factual basis</li> <li>• Requirement of availability of expertise</li> <li>• Novelty</li> </ul> | <ul style="list-style-type: none"> <li>• Qualitative approach</li> <li>• Quantitative or semi-quantitative approaches</li> <li>• Rating and ranking</li> <li>• Best-worst scaling</li> <li>• Risk analysis</li> <li>• Standardisation of signals</li> <li>• Delphi approach</li> <li>• Public consultation</li> <li>• Engagement of experts</li> <li>• Mixed methods</li> </ul> |

**Table 3: Prioritisation criteria and methods used in horizon-scanning to assess signals**

Logically, the criteria consider the potential impact on outcomes, a clear example being resource consumption, and the cost of a signal.(34, 42) The size and composition of the

1  
2  
3 affected population are therefore important factors,(34, 45, 47, 48) as well as the expected  
4 variation that may be observed between different subsets.(42, 47) For the signal to be  
5 prioritised, the timeframe must be realistic,(11, 34, 49) and there must be a clear, factual  
6 indication of true novelty and desirability. In addition to evidence of effectiveness,  
7 consideration must be given to the relative added-value over current practice,(34) and  
8 whether this sufficient to satisfy strategic and/or political priorities and policies (e.g.,  
9 reduction in inequality)(42).

10  
11 With respect to prioritisation methods, a simple qualitative approach uses short summaries  
12 of the signals as a basis to prioritise.(50) Quantitative or semi-quantitative approaches are  
13 obviously more rigorous and typical (for details of such approaches see supplementary  
14 information).

15  
16  
17  
18  
19  
20  
21  
22  
23  
24  
25  
26  
27  
28  
29  
30  
31  
32  
33  
34  
35  
36  
37  
38  
39  
40  
41  
42  
43  
44  
45  
46  
47  
48  
49  
50  
51  
52  
53  
54  
55  
56  
57  
58  
59  
60  
There were several novel Delphi approaches developed, for example, to acquire expert input  
online in a continuous feedback forum or market place. Here, participants prioritise, or  
purchase, a limited number of signals which then accrue a "price" that can ultimately be  
used to prioritise those of greatest value.(33) Controls are possible to counteract the  
possibility of scoring fatigue.(51)

Finally, it should be emphasised that the engagement of experts for prioritisation must  
ensure diverse participation from different sectors, geographical regions, disciplines, and  
demographics.(29, 43, 52) Public consultation is a valuable asset to provide input and  
involvement from citizens and users in prioritisation, and can be achieved in person, via  
email or online.(34, 39)

## Signal assessment and methods

*For more detailed and explanatory results, please see the supplementary information.*

The signals which have met the prioritisation criteria are then assessed. The factors assessed, and the methods employed to do so, are in Table 4. (e.g., in terms of resource implications and broad financial perspectives).

| Signal assessment                                                                                                                                                                                                                                                                                                                              | Assessment methods                                                                                                                                                                         |
|------------------------------------------------------------------------------------------------------------------------------------------------------------------------------------------------------------------------------------------------------------------------------------------------------------------------------------------------|--------------------------------------------------------------------------------------------------------------------------------------------------------------------------------------------|
| <ul style="list-style-type: none"> <li>Impact, e.g., resource (financial) implications</li> <li>Level of innovation</li> <li>Expected utilisation and diffusion</li> <li>Risk assessment</li> <li>Actions required and time to impact</li> <li>Legal and ethical issues</li> <li>Barriers to market</li> <li>Stakeholder perception</li> </ul> | <ul style="list-style-type: none"> <li>ExpertLens</li> <li>Driver analysis</li> <li>Scenario planning</li> <li>Expert, user and policy-maker participation</li> <li>Peer review</li> </ul> |

**Table 4: Signal assessment and methods used in horizon-scanning**

A key factor to consider in the assessment of any signal, of course, are the resource implications. The expected utilisation and availability of the innovation across different geographical regions is also important(32, 34, 45), as is a detailed risk assessment. A number of practical issues must also be considered, including actions needed to translate the signal into use (such as further research, the development of new processes, and whether complementary technology, for example, is essential to realise the value of the signal), the time and investment required to do so, the need for new or specialised training of personnel involved,(11) the cooperation and acceptance of key stakeholders, any ethical

issues, access to the necessary experts(5) and the intellectual property associated with the signal, and whether legislative or regulatory guideline changes are required. As always, impact on the market must be taken into consideration: is the innovation likely to have a disruptive effect, will it encounter reimbursement barriers, what are the timelines and milestones,(33) etc.? A consensus level of innovation can be sought (e.g., important, moderate, modest)(53).

Insofar as the methods used for signal assessment are concerned, a number of approaches are available (see supplementary information).

## Dissemination and evaluation of the results of horizon scanning

*For more detailed and explanatory results, please see the supplementary information.*

The key elements involved in the disseminating and evaluating the results of horizon scanning are listed in Table 5.

| Dissemination                                                                                                                              | Evaluation                                                                                                                                                                                                                         |
|--------------------------------------------------------------------------------------------------------------------------------------------|------------------------------------------------------------------------------------------------------------------------------------------------------------------------------------------------------------------------------------|
| <ul style="list-style-type: none"> <li>• Format</li> <li>• Methods</li> <li>• Audience</li> <li>• Frequency</li> <li>• Updating</li> </ul> | <ul style="list-style-type: none"> <li>• Short, medium and long-term</li> <li>• Process and output audit</li> <li>• Validation and sensitivity</li> <li>• Focus groups</li> <li>• Metrics</li> <li>• Access to database</li> </ul> |

**Table 5: Dissemination and evaluation of the results of horizon-scanning**

1  
2  
3 In terms of dissemination, the assessment of an individual signal can be summarised in a  
4 document with the following elements: authors, lay summary, assessment objectives and  
5 methods, background and current practice, signal description, impacts and other issues,  
6 estimated time to impact, comparator signals (innovations), expert opinion, and declaration  
7 of any conflict of interests. It may also be beneficial to include policy recommendations  
8 which are linked to decision-making priorities, structures, and individual and cross-cutting  
9 policies.(18, 30, 38, 45, 48) Dissemination can be achieved, when a new report is  
10 available, via numerous pathways, including email, social media, notification of target  
11 groups,(39, 43) public events involving the participation of policymakers,(5, 34) publicly-  
12 accessible repositories of data or outputs that are clearly indexed, easily searchable and  
13 categorised, for example, by level of evidence and other metrics.(41, 54)  
14

15  
16  
17  
18  
19  
20  
21  
22  
23  
24  
25  
26  
27  
28  
29  
30  
31  
32  
33  
34  
35  
36  
37  
38  
39  
40  
41  
42  
43  
44  
45  
46  
47  
48  
49  
50  
51  
52  
53  
54  
55  
56  
57  
58  
59  
60  
Dissemination of any new report should be made systematically through diverse  
platforms(43) and shared directly with relevant organisations.(41) The frequency of  
dissemination depends on circumstances.

A related activity that bridges dissemination and evaluation is the updating of horizon-  
scanning information. This comprises four essential elements: (a) continually checking and  
pruning sources based on their usefulness, relevance, and evolution, (b) monitoring and  
updating changes in signals by periodically refreshing the horizon scan, (c) reassessment of  
signals when sufficient new data are available or a step-change in technology has occurred,  
(d) validating annually, for example, the horizon-scanning update by a team of expert  
researchers, practitioners and journalists.

Evaluation of the results of horizon-scanning can be performed in the short, medium and  
long-term. A short-term evaluation may involve the following actions: survey of an  
appropriate audience on the usefulness of horizon-scanning in decision-making; use of  
metrics (e.g., provided by Google Analytics), such as number of downloads, page views,  
average session duration, citations in publications and funding applications; reports of

1  
2  
3 failures; consistency with other horizon scanning methods. In the medium-term, an  
4  
5 evaluation would include the responsiveness of the horizon-scanning team to requests; the  
6  
7 ability to keep the horizon-scanning content up-to-date; to compare findings with “gold”  
8  
9 standards (e.g., EuroScan, The Agency for Healthcare Research and Quality); and to  
10  
11 measure sensitivity and associated predictive value. Finally, a long-term evaluation  
12  
13 assesses the usage of horizon-scanning information in arriving at decisions; the accuracy of  
14  
15 projections; the timeliness with which new technologies were detected; the prioritisation  
16  
17 criteria which best signalled the impact of the technology.  
18

19  
20 A process and output audit represents another approach to evaluation and ensures the  
21  
22 completeness of the search record; records of external input; records of expert contact  
23  
24 details; clear filing of information used; and a clear statement of the innovation in the  
25  
26 briefing. A focus group of users can be employed to review the information input and  
27  
28 dissemination and to develop a user-friendly interface through which to access the  
29  
30 database.  
31  
32  
33  
34  
35  
36  
37  
38  
39  
40  
41  
42  
43  
44  
45  
46  
47  
48  
49  
50  
51  
52  
53  
54  
55  
56  
57  
58  
59  
60

## DISCUSSION

There were a wide variety of sources and methods used to identify new and emerging issues. However, it was common to use scientific literature, individuals, committees and expert groups, the web and Delphi methodologies. That the scientific literature dominates is expected as innovation often begins in an academic environment and because widely-accessible bibliographic databases have powerful search and filtering capabilities. The frequent use of the Delphi methodology may be explained by its ability to 'crowd-source' information and build a consensus amongst participants in a relatively short timeframe. This consensus, particularly expert consensus, adds weight to the conclusions drawn from horizon scanning.

Overall, the majority of the methods used were manual or semi-automated, with relatively few automated aspects. This could be due to the limited availability of software and budget constraints. Complex filtration, prioritisation and assessment criteria are some of the barriers to full automation that may be resolved in the not-too-distant future by the rapidly evolving fields of machine learning and artificial intelligence.

Dissemination of horizon-scanning reports appear to have rarely fed directly and systematically into policymaking. This may simply be a reflection of the unpredictable and political nature of policymaking, as well as a mismatch with the longer time-scale of horizon-scanning. Equally, it is probably fair to say that the information gathered by horizon-scanning lacks, at least to some extent, the conventional measures of credibility and authority required to influence policymaking.<sup>(30)</sup> New tools and approaches (e.g., via generation of complex scenarios and the clear weighting of evidence)<sup>(30, 55)</sup> are probably needed to enable horizon-scanning to be considered more seriously by policymakers.

The distance of the horizon scanned was also found to be a tricky balance between the need to assess signals as early as possible to inform decision makers, and the limited information

1  
2  
3 available at an early stage.(56) There were many different evaluation methods employed,  
4 covering different time-spans, reflecting *inter alia* cultural differences, resource limitations  
5 and a time-lag between horizon-scanning and its critical evaluation (for example, a high  
6 false-positive rate of horizon-scanning implied the need for tighter filtration criteria)(2).  
7  
8  
9

10  
11 From a public policy standpoint, horizon-scanning has both informative and creative  
12 functions, alerting policy makers to emerging issues, and providing new, plausible policy  
13 options.(5) This use of horizon-scanning is well established for identification of emerging  
14 issues, both positive and negative, in global conservation and biological diversity.(57) In  
15 some contrast, however, in the biomedical field, in which this review has concentrated,  
16 horizon-scanning is biased towards identification of positive, innovative signals as those with  
17 low value inevitably have little impact.(58) Finally, in addition to its institutional value,  
18 horizon-scanning can significantly help related stakeholders, such as technology developers  
19 or civil society - it can reveal barriers to innovation and allow proactive engagement to  
20 reduce these barriers.(59)  
21  
22  
23  
24  
25  
26  
27  
28  
29  
30  
31

## 32 33 **Limitations** 34 35

36 As systematic reviews into horizon scanning in healthcare have been undertaken previously,  
37 some duplication of findings was inevitable;(1-5) however, this review offers an up-to-date  
38 and wider perspective, and includes methodologies from beyond the health field. Resource  
39 limitations have precluded evaluation of horizon-scanning in other, related sectors, and  
40 consideration of material in languages other than English and Italian. Lastly, a fully  
41 comprehensive review of all methodologies has not been performed for practical reasons:  
42 the inconsistent reporting of the horizon-scanning details and the continually evolving  
43 approaches employed. This effort must be viewed as a 'snapshot', therefore, of a rapidly  
44 moving target.  
45  
46  
47  
48  
49  
50  
51  
52  
53  
54  
55  
56  
57  
58  
59  
60



## Conclusions

To respond to accelerating innovation, horizon-scanning methodology is being adopted both nationally and internationally, particularly in the public sector. The range of methods used, and the limited assessment of their performance, renders recommendation of a single approach premature and explains why combining two or more techniques makes sense for validation and for improving the accuracy of predictions.(4, 5)

Undoubtedly, automation and the development of 'intelligent' horizon-scanning are short-term milestones that will significantly improve the process, enhancing the evidence base, disseminating the acquired outputs efficiently, and facilitating decision-making. Self-evidently, given the need for horizon-scanning across diverse disciplines, involving large numbers of interested stakeholders with related information needs, the process can only benefit from international collaboration. To this end an initiative is already underway within the International Coalition of Medicines Regulatory Authorities in which the EMA is taking an active role)(60, 61). Of course, scanning the horizon for signals is not an endpoint, in and of itself, but rather a window through which current and future opportunities and policies can be linked.(62) It is essential, therefore, that further research be performed to develop, assess and ultimately implement the most efficacious methods of scanning and to ensure their acceptance and uptake by relevant stakeholders.

## Acknowledgments

Thank you to Angela Brand, Monica Ensini and Lucia D'apote for your kind assistance.

## Disclaimer

The views expressed in this article are the personal views of the authors and may not be understood or quoted as being made on behalf of or reflecting the position of the agencies or organisations with which the authors are affiliated.

## Data sharing

The dataset is available in the supplementary data file or upon request.

## Competing interests

We declare that no support from any organisation for the submitted work; no financial relationships with any organisations that might have an interest in the submitted work in the previous three years; no other relationships or activities that could appear to have influenced the submitted work.

## Funding

This research received no specific grant from any funding agency in the public, commercial or not-for-profit sectors.

## Author contributions:

Philip Hines, Marisa Papaluca, Li hui yu and Richard Guy all made the following contributions to the work:

- Substantial contributions to the conception or design of the work; or the acquisition, analysis, or interpretation of data for the work; AND
- Drafting the work or revising it critically for important intellectual content; AND
- Final approval of the version to be published; AND
- Agreement to be accountable for all aspects of the work in ensuring that questions related to the accuracy or integrity of any part of the work are appropriately investigated and resolved.

## REFERENCES

1. Packer C, Simpson S, Almeida RT. EuroScan International Network Member Agencies: their structure, processes, and outputs. . *International Journal of Technology Assessment in Health Care*. 2015;31(1-2):78-85.
2. Packer C, Fung M, Stevens A. Analyzing 10 years of early awareness and alert activity in the United Kingdom. *International Journal of Technology Assessment in Health Care*. 2012;28(3):308-14.
3. Sun F, Bruening W, Uhl S, Ballard R, Tipton K, Schoelles K. Quality, Regulation and Clinical Utility of Laboratory-developed Molecular Tests. AHRQ Technology Assessments. Rockville (MD)2010.
4. Doos L, Packer C, Ward D, Simpson S, Stevens A. Past speculations of the future: a review of the methods used for forecasting emerging health technologies. *BMJ Open*. 2016;6(3).
5. Amanatidou E, Butter M, Carabias V, Könnölä T, Leis M, Saritas O, et al. On concepts and methods in horizon scanning: Lessons from initiating policy dialogues on emerging issues. *Science and Public Policy*. 2012;39(2):208-21.
6. Collins A. The Global Risks Report 2018. Geneva: World Economic Forum; 2018.
7. Bujar M MN, Liberti L. R&D Briefing 65: New drug approvals in six major authorities 2007 – 2016: Focus on the internationalisation of medicines. London: Centre for Innovation in Regulatory Science; 2017.
8. O'Dwyer L, Nolan L, Fisher C. Supporting Innovation through Regulation and Science: Ireland as an Innovation Hub for Health Products. *Biomedicine Hub*. 2017;2(Suppl. 1):3-.
9. ICMRA. Key Outcomes. Kyoto: International Coalition of Medicines Regulatory Authorities (ICMRA); 2017.
10. Stevens A, Packer C, Roberts G. Early warning and of new health care technologies in the United Kingdom. *International Journal of Technology Assessment in Health Care*. 1998;14(4):680-6.
11. Plüddemann A, Heneghan C, Thompson M, Roberts N, Summerton N, Linden-Phillips L, et al. Prioritisation criteria for the selection of new diagnostic technologies for evaluation. *BMC health services research*. 2010;10(1):109.
12. EuroScan. A toolkit for the identification and assessment of new and emerging health technologies. Birmingham; 2014.
13. Urquhart GJ, Saunders P. Wider horizons, wiser choices: horizon scanning for public health protection and improvement. *Journal of public health (Oxford, England)*. 2017;39(2):248-53.
14. Sun F, Schoelles K. A systematic review of methods for health care technology horizon scanning. . *Agency for Healthcare Research and Quality*. 2013.
15. Mulrow CD. Systematic Reviews: Rationale for systematic reviews. *BMJ*. 1994;309(6954):597-9.
16. Moher D, Liberati A, Tetzlaff J, Altman DG, The PG. Preferred Reporting Items for Systematic Reviews and Meta-Analyses: The PRISMA Statement. *PLOS Medicine*. 2009;6(7):e1000097.
17. McHugh ML. Interrater reliability: the kappa statistic. *Biochemia Medica*. 2012;22(3):276-82.
18. CADTH. CADTH Environmental Scan Process. 2015.
19. Jones MM, Hall A, Brooker D, Castle-Clarke S, Winpenny E, Jahagirdar D, et al. The future of public health: a horizon scan. *Rand health quarterly*. 2014;4(3).
20. Varela-Lema L, De La Fuente-Cid R, López-García M. Developing a prioritized list of innovative technologies: the Spanish experience. *International Journal of Technology Assessment in Health Care*. 2014;30(6):626-33.

21. Office TEP. 2018 [Available from: <https://www.epo.org/index.html>].
22. Working together to improve NHS planning for new medicines: UK PhramaScan; 2018 [Available from: <https://www.ukpharmascan.org.uk/static/about>].
23. Smith J, Ward D, Michaelides M, Moore AT, Simpson S. New and emerging technologies for the treatment of inherited retinal diseases: a horizon scanning review. *Eye*. 2015;29:1131.
24. Jackson GMDMGTKAHJCM, Michael N, Deidre B, E CH, Andrew M, Deborah S, et al. Trans Tasman Radiation Oncology Group: Development of the Assessment of New Radiation Oncology Technology and Treatments (ANROTAT) Framework. *Journal of Medical Imaging and Radiation Oncology*. 2015;59(3):363-70.
25. Noorlander CW, Kooi MW, Oomen AG, Park MV, Vandebriel RJ, Geertsma RE. Horizon scan of nanomedicinal products. *Nanomedicine*. 2015;10(10):1599-608.
26. Clyne M, Schully SD, Dotson WD, Douglas MP, Gwinn M, Kolor K, et al. Horizon scanning for translational genomic research beyond bench to bedside. *Genetics in Medicine*. 2014;16(7):535.
27. Saunders PJ, Middleton JD, Rudge G. Environmental Public Health Tracking: a cost-effective system for characterizing the sources, distribution and public health impacts of environmental hazards. *Journal of Public Health*. 2017;39(3):506-13.
28. Varela-Lema L, Punal-Riobóo J, Acción BC, Ruano-Ravina A, García ML. Making processes reliable: a validated pubmed search strategy for identifying new or emerging technologies. *International journal of technology assessment in health care*. 2012;28(4):452-9.
29. Sutherland WJ, Broad S, Caine J, Clout M, Dicks LV, Doran H, et al. A Horizon Scan of Global Conservation Issues for 2016. *Trends in Ecology & Evolution*. 2016;31(1):44-53.
30. Garnett K, Lickorish FA, Rocks SA, Prpich G, Rathe AA, Pollard SJ. Integrating horizon scanning and strategic risk prioritisation using a weight of evidence framework to inform policy decisions. *The Science of the total environment*. 2016;560-561:82-91.
31. Sutherland WJ, Freckleton RP. Making predictive ecology more relevant to policy makers and practitioners. *Philosophical Transactions of the Royal Society B: Biological Sciences*. 2012;367(1586):322-30.
32. Veenstra DL, Piper M, Haddow JE, Pauker SG, Klein R, Richards CS, et al. Improving the efficiency and relevance of evidence-based recommendations in the era of whole-genome sequencing: an EGAPP methods update. *Genetics in medicine*. 2013;15(1):14.
33. Masum H, Ranck J, Singer PA. Five promising methods for health foresight. *Foresight*. 2010;12(1):54-66.
34. Sun F, Schoelles K. A systematic review of methods for health care technology horizon scanning. *AHRQ Publication*. 2013:1-82.
35. Dawson MN, Algar AC, Antonelli A, Dávalos LM, Davis E, Early R, et al. An horizon scan of biogeography. *Frontiers of biogeography*. 2013;5(2).
36. Birko S, Dove ES, Özdemir V. Evaluation of Nine Consensus Indices in Delphi Foresight Research and Their Dependency on Delphi Survey Characteristics: A Simulation Study and Debate on Delphi Design and Interpretation. *PLOS ONE*. 2015;10(8).
37. Birko S, Dove ES, Özdemir V. A Delphi Technology Foresight Study: Mapping Social Construction of Scientific Evidence on Metagenomics Tests for Water Safety. *PLOS ONE*. 2015;10(6):e0129706.
38. Kark S, Sutherland WJ, Shanas U, Klass K, Achisar H, Dayan T, et al. Priority Questions and Horizon Scanning for Conservation: A Comparative Study. *PLOS ONE*. 2016;11(1).
39. Simpson S, Cook A, Miles K. Patient and public involvement in early awareness and alert activities: an example from the United Kingdom *International Journal of Technology Assessment in Health Care*. 2018;34(01):10-7.
40. Reimers-Hild C. Strategic foresight, leadership, and the future of rural healthcare staffing in the United States. *Jaapa*. 2018;31(5):44-9.

- 1
- 2
- 3
41. Gwinn M, Grossniklaus DA, Yu W, Melillo S, Wulf A, Flome J, et al. Horizon scanning for new genomic tests. *Genetics in Medicine*. 2011;13(2):161.
42. Ciani O, Jommi C. The role of health technology assessment bodies in shaping drug development. *Drug design, development and therapy*. 2014;8:2273.
43. Nachtnebel A, Breuer J, Willenbacher W, Bucsecs A, Krippel P, Wild C. Looking back on 5 years of horizon scanning in oncology. *International journal of technology assessment in health care*. 2016;32(1-2):54-60.
44. Stafinski T, Topfer L-A, Zakariasen K, Menon D. The role of surgeons in identifying emerging technologies for health technology assessment. *Canadian Journal of Surgery*. 2010;53(2):86-92.
45. Eriksson I, Wettermark B, Persson M, Edström M, Godman B, Lindhé A, et al. The Early Awareness and Alert System in Sweden: History and Current Status. *Frontiers in Pharmacology*. 2017;8(674).
46. RANZCR. Position Paper - Techniques and Technologies in Radiation Oncology 2015 Sydney: The Royal Australian and New Zealand College of Radiologists; 2015.
47. Nachtnebel A, Geiger-Gritsch S, Hintringer K, Wild C. Scanning the horizon—Development and implementation of an early awareness system for anticancer drugs in Austria. *Health Policy*. 2012;104(1):1-11.
48. Raman G, Wallace B, Patel K, Lau J, Trikalinos TA. Update on horizon scans of genetic tests currently available for clinical use in cancers. In: Quality AfHRA, editor. Rockville (MD)2011.
49. Wild C, Simpson S, Douw K, Geiger-Gritsch S, Mathis S, Langer T. Information service on new and emerging health technologies: Identification and prioritization processes for a European Union-wide newsletter. *International Journal of Technology Assessment in Health Care*. 2009;25(S2):48-55.
50. Maddern G, Boulton M, Ahern E, Babidge W. ASERNIP-S: International trend setting. *ANZ journal of surgery*. 2008;78(10):853-8.
51. Chapman AM, Taylor CA, Girling AJ. PRM22 The Headroom Method of Early Economic Evaluation of Medical Devices: A Useful Tool for Device Developers? *Value in Health*. 2012;15(7):A463-A4.
52. Rudd MA, Moore AFP, Rochberg D, Bianchi-Fossati L, Brown MA, D'Onofrio D, et al. Climate research priorities for policy-makers, practitioners, and scientists in Georgia, USA. *Environmental management*. 2018.
53. Joppi R, Demattè L, Menti AM, Pase D, Poggiani C, Mezzalana L, et al. The Italian Horizon Scanning Project. *European journal of clinical pharmacology*. 2009;65(8):775-81.
54. Khoury MJ, Gwinn M, Dotson WD, Schully SD. Knowledge integration at the center of genomic medicine. *Genetics in Medicine*. 2012;14(7):643.
55. Gale P, Breed AC. Horizon scanning for emergence of new viruses: from constructing complex scenarios to online games. *Transboundary and Emerging Diseases*. 2012;60(5):472-4.
56. Wild C, Langer T. Emerging health technologies: informing and supporting health policy early. *Health Policy*. 2008;87(2):160-71.
57. Sutherland WJ, Butchart SH, Connor B, Culshaw C, Dicks LV, Dinsdale J, et al. A 2018 horizon scan of emerging issues for global conservation and biological diversity. *Trends in Ecology & Evolution*. 2018;33(1):47-58.
58. Mundy L, Hiller J, Merlin T. The true role of horizon scanning in Australia: who it informs and why. *International Journal of Technology Assessment in Health Care*. 2011;27(1):95-6.
59. Ciani O, Jommi C. The role of health technology assessment bodies in shaping drug development. *Drug Des Devel Ther*. 2014;8:2273-81.
60. ICMRA. ICMRA strategic priority on innovation. 2017 [Available from: [http://www.icmra.info/drupal/sites/default/files/2017-12/ICMRA%20Innovation%20Concept%20Note\\_0.pdf](http://www.icmra.info/drupal/sites/default/files/2017-12/ICMRA%20Innovation%20Concept%20Note_0.pdf)].

- 1
  - 2
  - 3
  - 4
  - 5
  - 6
  - 7
  - 8
  - 9
  - 10
  - 11
  - 12
  - 13
  - 14
  - 15
  - 16
  - 17
  - 18
  - 19
  - 20
  - 21
  - 22
  - 23
  - 24
  - 25
  - 26
  - 27
  - 28
  - 29
  - 30
  - 31
  - 32
  - 33
  - 34
  - 35
  - 36
  - 37
  - 38
  - 39
  - 40
  - 41
  - 42
  - 43
  - 44
  - 45
  - 46
  - 47
  - 48
  - 49
  - 50
  - 51
  - 52
  - 53
  - 54
  - 55
  - 56
  - 57
  - 58
  - 59
  - 60
61. HMA, EMA. Mandate of the European Innovation Network. 2016.
62. Wettermark B, Persson ME, Wilking N, Kalin M, Korkmaz S, Hjemdahl P, et al. Forecasting drug utilization and expenditure in a metropolitan health region. *BMC Health Services Research*. 2010;10(1).

For peer review only

1  
2  
3  
4  
5  
6  
7  
8  
9  
10  
11  
12  
13  
14  
15  
16  
17  
18  
19  
20  
21  
22  
23  
24  
25  
26  
27  
28  
29  
30  
31  
32  
33  
34  
35  
36  
37  
38  
39  
40  
41  
42  
43  
44  
45  
46  
47  
48  
49  
50  
51  
52  
53  
54  
55  
56  
57  
58  
59  
60

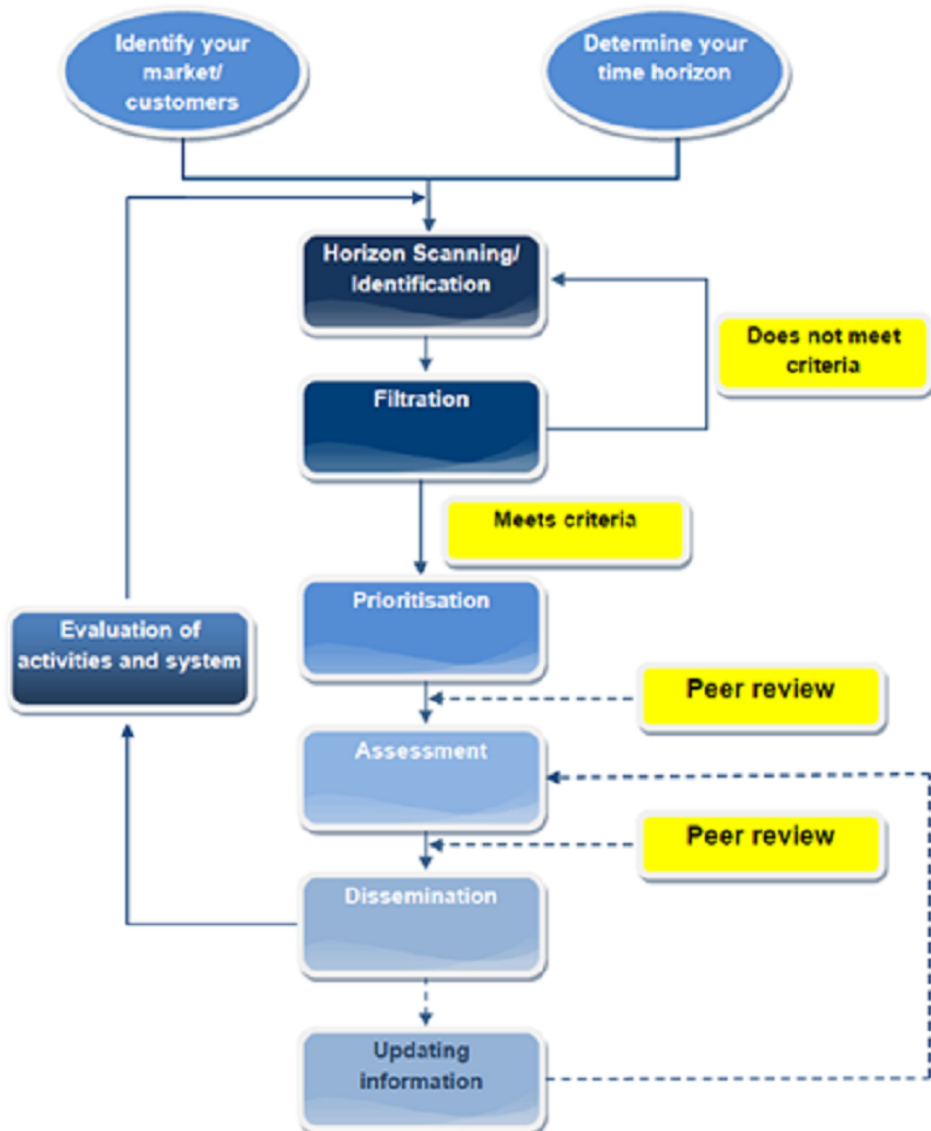

Fig 1. Common stages of Horizon scanning from the EuroScan network (12). This figure is licensed under the Creative Commons Attribution-NonCommercial-ShareAlike4.0 International License (CC BY-NC-SA 4.0)

97x113mm (300 x 300 DPI)



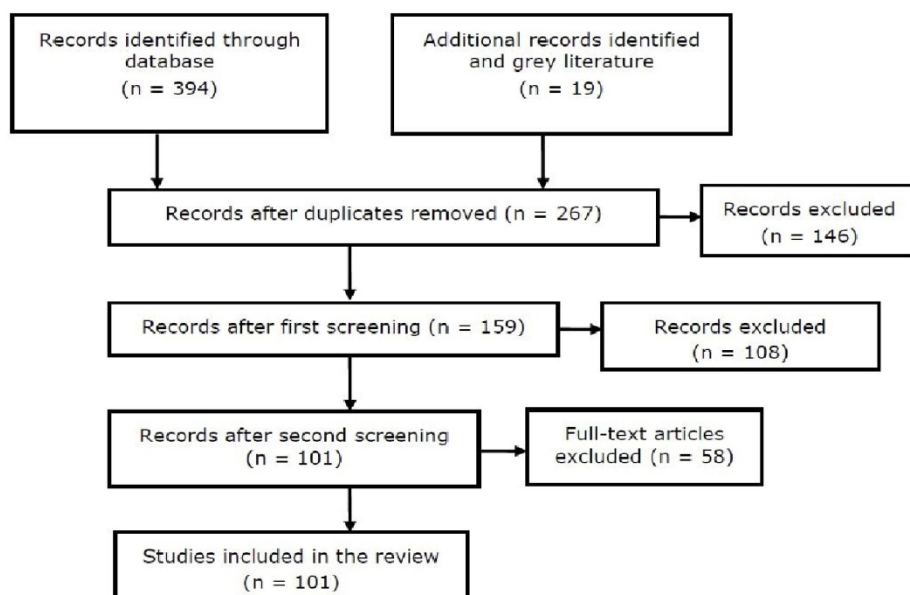

Caption : Fig 2. Literature selection process flowchart (16)

150x102mm (300 x 300 DPI)





1  
2  
3  
4  
5  
6  
7  
8  
9  
10  
11  
12  
13  
14  
15  
16  
17  
18  
19  
20  
21  
22  
23  
24  
25  
26  
27  
28  
29  
30  
31  
32  
33  
34  
35  
36  
37  
38  
39  
40  
41  
42  
43  
44  
45  
46  
47  
48  
49  
50  
51  
52  
53  
54  
55  
56  
57  
58  
59  
60

|                                                                                                 |                                                                                                                                                                                                                                                                                                                                                                                                                                                                                                                     |                                         |
|-------------------------------------------------------------------------------------------------|---------------------------------------------------------------------------------------------------------------------------------------------------------------------------------------------------------------------------------------------------------------------------------------------------------------------------------------------------------------------------------------------------------------------------------------------------------------------------------------------------------------------|-----------------------------------------|
| Knowledge integration of the nature of population health                                        | <p><a href="https://doi.org/10.1136/bmjopen-2018-025181">https://doi.org/10.1136/bmjopen-2018-025181</a></p> <p>These authors have contributed to the development of the population health concept, and the integration of the nature of population health into the public health practice. The authors have also contributed to the development of the population health concept, and the integration of the nature of population health into the public health practice.</p>                                      |                                         |
| Business case for good population health                                                        | <p><a href="https://doi.org/10.1136/bmjopen-2018-025182">https://doi.org/10.1136/bmjopen-2018-025182</a></p> <p>This paper presents the business case for good population health, and the integration of the nature of population health into the public health practice. The authors have also contributed to the development of the population health concept, and the integration of the nature of population health into the public health practice.</p>                                                        |                                         |
| Building on complex evidence in health: the health equity gap                                   | <p><a href="https://doi.org/10.1136/bmjopen-2018-025183">https://doi.org/10.1136/bmjopen-2018-025183</a></p> <p>This paper presents the health equity gap, and the integration of the nature of population health into the public health practice. The authors have also contributed to the development of the population health concept, and the integration of the nature of population health into the public health practice.</p>                                                                               |                                         |
| The health equity gap and the health equity gap                                                 | <p><a href="https://doi.org/10.1136/bmjopen-2018-025184">https://doi.org/10.1136/bmjopen-2018-025184</a></p> <p>This paper presents the health equity gap, and the integration of the nature of population health into the public health practice. The authors have also contributed to the development of the population health concept, and the integration of the nature of population health into the public health practice.</p>                                                                               |                                         |
| Public health and the health equity gap                                                         | <p><a href="https://doi.org/10.1136/bmjopen-2018-025185">https://doi.org/10.1136/bmjopen-2018-025185</a></p> <p>This paper presents the health equity gap, and the integration of the nature of population health into the public health practice. The authors have also contributed to the development of the population health concept, and the integration of the nature of population health into the public health practice.</p>                                                                               | PUBLIC HEALTH AND THE HEALTH EQUITY GAP |
| Challenges and priorities for enabling health and well-being in the future of population health | <p><a href="https://doi.org/10.1136/bmjopen-2018-025186">https://doi.org/10.1136/bmjopen-2018-025186</a></p> <p>This paper presents the challenges and priorities for enabling health and well-being in the future of population health, and the integration of the nature of population health into the public health practice. The authors have also contributed to the development of the population health concept, and the integration of the nature of population health into the public health practice.</p> |                                         |
| Policy options and business case for population health                                          | <p><a href="https://doi.org/10.1136/bmjopen-2018-025187">https://doi.org/10.1136/bmjopen-2018-025187</a></p> <p>This paper presents the policy options and business case for population health, and the integration of the nature of population health into the public health practice. The authors have also contributed to the development of the population health concept, and the integration of the nature of population health into the public health practice.</p>                                          |                                         |
| Techniques and technologies to population health: the health equity gap                         | <p><a href="https://doi.org/10.1136/bmjopen-2018-025188">https://doi.org/10.1136/bmjopen-2018-025188</a></p> <p>This paper presents the techniques and technologies to population health, and the integration of the nature of population health into the public health practice. The authors have also contributed to the development of the population health concept, and the integration of the nature of population health into the public health practice.</p>                                                |                                         |
| A review of the health equity gap                                                               | <p><a href="https://doi.org/10.1136/bmjopen-2018-025189">https://doi.org/10.1136/bmjopen-2018-025189</a></p> <p>This paper presents the health equity gap, and the integration of the nature of population health into the public health practice. The authors have also contributed to the development of the population health concept, and the integration of the nature of population health into the public health practice.</p>                                                                               | Merrill and<br>Merrill                  |
| A review of the health equity gap                                                               | <p><a href="https://doi.org/10.1136/bmjopen-2018-025190">https://doi.org/10.1136/bmjopen-2018-025190</a></p> <p>This paper presents the health equity gap, and the integration of the nature of population health into the public health practice. The authors have also contributed to the development of the population health concept, and the integration of the nature of population health into the public health practice.</p>                                                                               | 1 author                                |
| Looking back 10 years of business case for population health                                    | <p><a href="https://doi.org/10.1136/bmjopen-2018-025191">https://doi.org/10.1136/bmjopen-2018-025191</a></p> <p>This paper presents the business case for population health, and the integration of the nature of population health into the public health practice. The authors have also contributed to the development of the population health concept, and the integration of the nature of population health into the public health practice.</p>                                                             |                                         |
| Challenges to the health equity gap                                                             | <p><a href="https://doi.org/10.1136/bmjopen-2018-025192">https://doi.org/10.1136/bmjopen-2018-025192</a></p> <p>This paper presents the challenges to the health equity gap, and the integration of the nature of population health into the public health practice. The authors have also contributed to the development of the population health concept, and the integration of the nature of population health into the public health practice.</p>                                                             |                                         |
| New and emerging technologies for the treatment of infectious diseases                          | <p><a href="https://doi.org/10.1136/bmjopen-2018-025193">https://doi.org/10.1136/bmjopen-2018-025193</a></p> <p>This paper presents the new and emerging technologies for the treatment of infectious diseases, and the integration of the nature of population health into the public health practice. The authors have also contributed to the development of the population health concept, and the integration of the nature of population health into the public health practice.</p>                          | Public health and the health equity gap |
| Public health and the health equity gap                                                         | <p><a href="https://doi.org/10.1136/bmjopen-2018-025194">https://doi.org/10.1136/bmjopen-2018-025194</a></p> <p>This paper presents the public health and the health equity gap, and the integration of the nature of population health into the public health practice. The authors have also contributed to the development of the population health concept, and the integration of the nature of population health into the public health practice.</p>                                                         | Public health and the health equity gap |
| Public health and the health equity gap                                                         | <p><a href="https://doi.org/10.1136/bmjopen-2018-025195">https://doi.org/10.1136/bmjopen-2018-025195</a></p> <p>This paper presents the public health and the health equity gap, and the integration of the nature of population health into the public health practice. The authors have also contributed to the development of the population health concept, and the integration of the nature of population health into the public health practice.</p>                                                         | Public health and the health equity gap |
| Public health and the health equity gap                                                         | <p><a href="https://doi.org/10.1136/bmjopen-2018-025196">https://doi.org/10.1136/bmjopen-2018-025196</a></p> <p>This paper presents the public health and the health equity gap, and the integration of the nature of population health into the public health practice. The authors have also contributed to the development of the population health concept, and the integration of the nature of population health into the public health practice.</p>                                                         | Public health and the health equity gap |
| Public health and the health equity gap                                                         | <p><a href="https://doi.org/10.1136/bmjopen-2018-025197">https://doi.org/10.1136/bmjopen-2018-025197</a></p> <p>This paper presents the public health and the health equity gap, and the integration of the nature of population health into the public health practice. The authors have also contributed to the development of the population health concept, and the integration of the nature of population health into the public health practice.</p>                                                         | Public health and the health equity gap |

1  
2  
3  
4  
5  
6  
7  
8  
9  
10  
11  
12  
13  
14  
15  
16  
17  
18  
19  
20  
21  
22  
23  
24  
25  
26  
27  
28  
29  
30  
31  
32  
33  
34  
35  
36  
37  
38  
39  
40  
41  
42  
43  
44  
45  
46  
47  
48  
49  
50  
51  
52  
53  
54  
55  
56  
57  
58  
59  
60

|                                                                                                           |                                                  |                                                                                                                                                                                                                                                                                                                                                                                                                         |                                                            |
|-----------------------------------------------------------------------------------------------------------|--------------------------------------------------|-------------------------------------------------------------------------------------------------------------------------------------------------------------------------------------------------------------------------------------------------------------------------------------------------------------------------------------------------------------------------------------------------------------------------|------------------------------------------------------------|
| <p><b>Strategy thought: how planning for the responsible use of smart technological devices works</b></p> | <p>1001206 (doi:10.1136/bmjopen-2015-021002)</p> | <p>Abstract summary of a research paper exploring the responsible use of smart technological devices. The paper discusses the challenges of managing smart devices in public spaces and the need for a multi-stakeholder approach to address these challenges. It highlights the importance of user education, policy development, and technical solutions in ensuring the safe and effective use of smart devices.</p> |                                                            |
| <p><b>Explanatory model for a changing world</b></p>                                                      | <p>1001207 (doi:10.1136/bmjopen-2015-021003)</p> | <p>Abstract summary of a research paper discussing an explanatory model for a changing world. The model focuses on the interplay between social, economic, and environmental factors that drive global change. It emphasizes the need for a holistic and dynamic approach to understanding and managing these complex systems.</p>                                                                                      |                                                            |
| <p><b>Improving the impact of existing evidence on public health practice: a realist review</b></p>       | <p>1001208 (doi:10.1136/bmjopen-2015-021004)</p> | <p>Abstract summary of a realist review aimed at improving the impact of existing evidence on public health practice. The review identifies the underlying mechanisms and contexts that influence the effectiveness of evidence-based interventions in public health settings.</p>                                                                                                                                      |                                                            |
| <p><b>Developing quality assurance for public health evidence: a realist review</b></p>                   | <p>1001209 (doi:10.1136/bmjopen-2015-021005)</p> | <p>Abstract summary of a realist review focusing on developing quality assurance for public health evidence. The review explores the factors that influence the quality and reliability of evidence used in public health decision-making.</p>                                                                                                                                                                          |                                                            |
| <p><b>A realist review of the impact of public health evidence on practice</b></p>                        | <p>1001210 (doi:10.1136/bmjopen-2015-021006)</p> | <p>Abstract summary of a realist review examining the impact of public health evidence on practice. The review identifies the barriers and enablers to the effective use of evidence in public health practice.</p>                                                                                                                                                                                                     |                                                            |
| <p><b>Developing a realist review of public health evidence: a realist review</b></p>                     | <p>1001211 (doi:10.1136/bmjopen-2015-021007)</p> | <p>Abstract summary of a realist review on developing a realist review of public health evidence. The review discusses the methodological challenges and best practices for conducting realist reviews in public health.</p>                                                                                                                                                                                            |                                                            |
| <p><b>The effectiveness of public health evidence on practice: a realist review</b></p>                   | <p>1001212 (doi:10.1136/bmjopen-2015-021008)</p> | <p>Abstract summary of a realist review assessing the effectiveness of public health evidence on practice. The review explores the factors that influence the effectiveness of evidence-based interventions in public health practice.</p>                                                                                                                                                                              |                                                            |
| <p><b>Public health evidence on practice: a realist review</b></p>                                        | <p>1001213 (doi:10.1136/bmjopen-2015-021009)</p> | <p>Abstract summary of a realist review on public health evidence on practice. The review identifies the mechanisms and contexts that influence the effectiveness of evidence-based interventions in public health practice.</p>                                                                                                                                                                                        | <p>Effectiveness of public health evidence on practice</p> |
| <p><b>Public health evidence on practice: a realist review</b></p>                                        | <p>1001214 (doi:10.1136/bmjopen-2015-021010)</p> | <p>Abstract summary of a realist review on public health evidence on practice. The review explores the factors that influence the effectiveness of evidence-based interventions in public health practice.</p>                                                                                                                                                                                                          | <p>Effectiveness of public health evidence on practice</p> |
| <p><b>Public health evidence on practice: a realist review</b></p>                                        | <p>1001215 (doi:10.1136/bmjopen-2015-021011)</p> | <p>Abstract summary of a realist review on public health evidence on practice. The review identifies the mechanisms and contexts that influence the effectiveness of evidence-based interventions in public health practice.</p>                                                                                                                                                                                        | <p>Effectiveness of public health evidence on practice</p> |
| <p><b>Public health evidence on practice: a realist review</b></p>                                        | <p>1001216 (doi:10.1136/bmjopen-2015-021012)</p> | <p>Abstract summary of a realist review on public health evidence on practice. The review explores the factors that influence the effectiveness of evidence-based interventions in public health practice.</p>                                                                                                                                                                                                          | <p>Effectiveness of public health evidence on practice</p> |
| <p><b>Public health evidence on practice: a realist review</b></p>                                        | <p>1001217 (doi:10.1136/bmjopen-2015-021013)</p> | <p>Abstract summary of a realist review on public health evidence on practice. The review identifies the mechanisms and contexts that influence the effectiveness of evidence-based interventions in public health practice.</p>                                                                                                                                                                                        | <p>Effectiveness of public health evidence on practice</p> |
| <p><b>Public health evidence on practice: a realist review</b></p>                                        | <p>1001218 (doi:10.1136/bmjopen-2015-021014)</p> | <p>Abstract summary of a realist review on public health evidence on practice. The review explores the factors that influence the effectiveness of evidence-based interventions in public health practice.</p>                                                                                                                                                                                                          | <p>Effectiveness of public health evidence on practice</p> |
| <p><b>Public health evidence on practice: a realist review</b></p>                                        | <p>1001219 (doi:10.1136/bmjopen-2015-021015)</p> | <p>Abstract summary of a realist review on public health evidence on practice. The review identifies the mechanisms and contexts that influence the effectiveness of evidence-based interventions in public health practice.</p>                                                                                                                                                                                        | <p>Effectiveness of public health evidence on practice</p> |
| <p><b>Public health evidence on practice: a realist review</b></p>                                        | <p>1001220 (doi:10.1136/bmjopen-2015-021016)</p> | <p>Abstract summary of a realist review on public health evidence on practice. The review explores the factors that influence the effectiveness of evidence-based interventions in public health practice.</p>                                                                                                                                                                                                          | <p>Effectiveness of public health evidence on practice</p> |
| <p><b>Public health evidence on practice: a realist review</b></p>                                        | <p>1001221 (doi:10.1136/bmjopen-2015-021017)</p> | <p>Abstract summary of a realist review on public health evidence on practice. The review identifies the mechanisms and contexts that influence the effectiveness of evidence-based interventions in public health practice.</p>                                                                                                                                                                                        | <p>Effectiveness of public health evidence on practice</p> |
| <p><b>Public health evidence on practice: a realist review</b></p>                                        | <p>1001222 (doi:10.1136/bmjopen-2015-021018)</p> | <p>Abstract summary of a realist review on public health evidence on practice. The review explores the factors that influence the effectiveness of evidence-based interventions in public health practice.</p>                                                                                                                                                                                                          | <p>Effectiveness of public health evidence on practice</p> |
| <p><b>Public health evidence on practice: a realist review</b></p>                                        | <p>1001223 (doi:10.1136/bmjopen-2015-021019)</p> | <p>Abstract summary of a realist review on public health evidence on practice. The review identifies the mechanisms and contexts that influence the effectiveness of evidence-based interventions in public health practice.</p>                                                                                                                                                                                        | <p>Effectiveness of public health evidence on practice</p> |
| <p><b>Public health evidence on practice: a realist review</b></p>                                        | <p>1001224 (doi:10.1136/bmjopen-2015-021020)</p> | <p>Abstract summary of a realist review on public health evidence on practice. The review explores the factors that influence the effectiveness of evidence-based interventions in public health practice.</p>                                                                                                                                                                                                          | <p>Effectiveness of public health evidence on practice</p> |
| <p><b>Public health evidence on practice: a realist review</b></p>                                        | <p>1001225 (doi:10.1136/bmjopen-2015-021021)</p> | <p>Abstract summary of a realist review on public health evidence on practice. The review identifies the mechanisms and contexts that influence the effectiveness of evidence-based interventions in public health practice.</p>                                                                                                                                                                                        | <p>Effectiveness of public health evidence on practice</p> |
| <p><b>Public health evidence on practice: a realist review</b></p>                                        | <p>1001226 (doi:10.1136/bmjopen-2015-021022)</p> | <p>Abstract summary of a realist review on public health evidence on practice. The review explores the factors that influence the effectiveness of evidence-based interventions in public health practice.</p>                                                                                                                                                                                                          | <p>Effectiveness of public health evidence on practice</p> |
| <p><b>Public health evidence on practice: a realist review</b></p>                                        | <p>1001227 (doi:10.1136/bmjopen-2015-021023)</p> | <p>Abstract summary of a realist review on public health evidence on practice. The review identifies the mechanisms and contexts that influence the effectiveness of evidence-based interventions in public health practice.</p>                                                                                                                                                                                        | <p>Effectiveness of public health evidence on practice</p> |
| <p><b>Public health evidence on practice: a realist review</b></p>                                        | <p>1001228 (doi:10.1136/bmjopen-2015-021024)</p> | <p>Abstract summary of a realist review on public health evidence on practice. The review explores the factors that influence the effectiveness of evidence-based interventions in public health practice.</p>                                                                                                                                                                                                          | <p>Effectiveness of public health evidence on practice</p> |
| <p><b>Public health evidence on practice: a realist review</b></p>                                        | <p>1001229 (doi:10.1136/bmjopen-2015-021025)</p> | <p>Abstract summary of a realist review on public health evidence on practice. The review identifies the mechanisms and contexts that influence the effectiveness of evidence-based interventions in public health practice.</p>                                                                                                                                                                                        | <p>Effectiveness of public health evidence on practice</p> |
| <p><b>Public health evidence on practice: a realist review</b></p>                                        | <p>1001230 (doi:10.1136/bmjopen-2015-021026)</p> | <p>Abstract summary of a realist review on public health evidence on practice. The review explores the factors that influence the effectiveness of evidence-based interventions in public health practice.</p>                                                                                                                                                                                                          | <p>Effectiveness of public health evidence on practice</p> |
| <p><b>Public health evidence on practice: a realist review</b></p>                                        | <p>1001231 (doi:10.1136/bmjopen-2015-021027)</p> | <p>Abstract summary of a realist review on public health evidence on practice. The review identifies the mechanisms and contexts that influence the effectiveness of evidence-based interventions in public health practice.</p>                                                                                                                                                                                        | <p>Effectiveness of public health evidence on practice</p> |
| <p><b>Public health evidence on practice: a realist review</b></p>                                        | <p>1001232 (doi:10.1136/bmjopen-2015-021028)</p> | <p>Abstract summary of a realist review on public health evidence on practice. The review explores the factors that influence the effectiveness of evidence-based interventions in public health practice.</p>                                                                                                                                                                                                          | <p>Effectiveness of public health evidence on practice</p> |
| <p><b>Public health evidence on practice: a realist review</b></p>                                        | <p>1001233 (doi:10.1136/bmjopen-2015-021029)</p> | <p>Abstract summary of a realist review on public health evidence on practice. The review identifies the mechanisms and contexts that influence the effectiveness of evidence-based interventions in public health practice.</p>                                                                                                                                                                                        | <p>Effectiveness of public health evidence on practice</p> |
| <p><b>Public health evidence on practice: a realist review</b></p>                                        | <p>1001234 (doi:10.1136/bmjopen-2015-021030)</p> | <p>Abstract summary of a realist review on public health evidence on practice. The review explores the factors that influence the effectiveness of evidence-based interventions in public health practice.</p>                                                                                                                                                                                                          | <p>Effectiveness of public health evidence on practice</p> |





1  
2  
3  
4  
5  
6  
7  
8  
9  
10  
11  
12  
13  
14  
15  
16  
17  
18  
19  
20  
21  
22  
23  
24  
25  
26  
27  
28  
29  
30  
31  
32  
33  
34  
35  
36  
37  
38  
39  
40  
41  
42  
43  
44  
45  
46  
47  
48  
49  
50  
51  
52  
53  
54  
55  
56  
57  
58  
59  
60

| Phase                                     | Activities                                                                                   | Assessment                                            |                               |                                           |                                                       |                               | Implementation                            |                                                       |                               |                                           |                                                       | Monitoring                    |                                           | Patient Involvement                                   |                               |                                           |
|-------------------------------------------|----------------------------------------------------------------------------------------------|-------------------------------------------------------|-------------------------------|-------------------------------------------|-------------------------------------------------------|-------------------------------|-------------------------------------------|-------------------------------------------------------|-------------------------------|-------------------------------------------|-------------------------------------------------------|-------------------------------|-------------------------------------------|-------------------------------------------------------|-------------------------------|-------------------------------------------|
|                                           |                                                                                              | Methods                                               | Tools                         | Design                                    | Methods                                               | Tools                         | Methods                                   | Tools                                                 | Methods                       | Tools                                     | Methods                                               | Tools                         | Methods                                   |                                                       |                               |                                           |
| Phase 1: Identification of the problem    | Identify the problem, its scope, and its impact on the community.                            | Interviews, focus groups, surveys, literature review. | Checklist, template analysis. | Qualitative, quantitative, mixed methods. | Interviews, focus groups, surveys, literature review. | Checklist, template analysis. | Qualitative, quantitative, mixed methods. | Interviews, focus groups, surveys, literature review. | Checklist, template analysis. | Qualitative, quantitative, mixed methods. | Interviews, focus groups, surveys, literature review. | Checklist, template analysis. | Qualitative, quantitative, mixed methods. | Interviews, focus groups, surveys, literature review. | Checklist, template analysis. | Qualitative, quantitative, mixed methods. |
| Phase 2: Development of the intervention  | Develop the intervention, including its content, delivery, and evaluation.                   | Interviews, focus groups, surveys, literature review. | Checklist, template analysis. | Qualitative, quantitative, mixed methods. | Interviews, focus groups, surveys, literature review. | Checklist, template analysis. | Qualitative, quantitative, mixed methods. | Interviews, focus groups, surveys, literature review. | Checklist, template analysis. | Qualitative, quantitative, mixed methods. | Interviews, focus groups, surveys, literature review. | Checklist, template analysis. | Qualitative, quantitative, mixed methods. | Interviews, focus groups, surveys, literature review. | Checklist, template analysis. | Qualitative, quantitative, mixed methods. |
| Phase 3: Evaluation of the intervention   | Evaluate the intervention, including its effectiveness, acceptability, and feasibility.      | Interviews, focus groups, surveys, literature review. | Checklist, template analysis. | Qualitative, quantitative, mixed methods. | Interviews, focus groups, surveys, literature review. | Checklist, template analysis. | Qualitative, quantitative, mixed methods. | Interviews, focus groups, surveys, literature review. | Checklist, template analysis. | Qualitative, quantitative, mixed methods. | Interviews, focus groups, surveys, literature review. | Checklist, template analysis. | Qualitative, quantitative, mixed methods. | Interviews, focus groups, surveys, literature review. | Checklist, template analysis. | Qualitative, quantitative, mixed methods. |
| Phase 4: Dissemination and implementation | Disseminate and implement the intervention, including its reach, sustainability, and impact. | Interviews, focus groups, surveys, literature review. | Checklist, template analysis. | Qualitative, quantitative, mixed methods. | Interviews, focus groups, surveys, literature review. | Checklist, template analysis. | Qualitative, quantitative, mixed methods. | Interviews, focus groups, surveys, literature review. | Checklist, template analysis. | Qualitative, quantitative, mixed methods. | Interviews, focus groups, surveys, literature review. | Checklist, template analysis. | Qualitative, quantitative, mixed methods. | Interviews, focus groups, surveys, literature review. | Checklist, template analysis. | Qualitative, quantitative, mixed methods. |

For peer review only



1  
2  
3  
4  
5  
6  
7  
8  
9  
10  
11  
12  
13  
14  
15  
16  
17  
18  
19  
20  
21  
22  
23  
24  
25  
26  
27  
28  
29  
30  
31  
32  
33  
34  
35  
36  
37  
38  
39  
40  
41  
42  
43  
44  
45  
46  
47  
48  
49  
50  
51  
52  
53  
54  
55  
56  
57  
58  
59  
60

These are  
the  
main  
reasons  
for  
the  
failure  
of  
the  
system  
to  
achieve  
its  
purpose.

High  
quality  
evidence  
is  
needed  
to  
support  
the  
use  
of  
the  
system  
in  
practice.

Against  
the  
background  
of  
the  
different  
technologies,  
the  
complexity  
of  
the  
requirements  
is  
increasing  
and  
the  
time  
to  
develop  
the  
system  
is  
decreasing.

The  
method  
used  
in  
this  
study  
to  
define  
the  
requirements  
of  
the  
system  
is  
described  
in  
the  
appendix.  
The  
method  
used  
in  
this  
study  
to  
define  
the  
requirements  
of  
the  
system  
is  
described  
in  
the  
appendix.

Other  
studies  
have  
used  
the  
same  
method  
to  
define  
the  
requirements  
of  
the  
system.  
The  
method  
used  
in  
this  
study  
to  
define  
the  
requirements  
of  
the  
system  
is  
described  
in  
the  
appendix.

Some  
of  
the  
requirements  
identified  
by  
the  
method  
used  
in  
this  
study  
to  
define  
the  
requirements  
of  
the  
system  
are  
described  
in  
the  
appendix.

Results  
of  
this  
study  
show  
that  
the  
method  
used  
in  
this  
study  
to  
define  
the  
requirements  
of  
the  
system  
is  
described  
in  
the  
appendix.

Some  
of  
the  
requirements  
identified  
by  
the  
method  
used  
in  
this  
study  
to  
define  
the  
requirements  
of  
the  
system  
are  
described  
in  
the  
appendix.

Results  
of  
this  
study  
show  
that  
the  
method  
used  
in  
this  
study  
to  
define  
the  
requirements  
of  
the  
system  
is  
described  
in  
the  
appendix.

Some  
of  
the  
requirements  
identified  
by  
the  
method  
used  
in  
this  
study  
to  
define  
the  
requirements  
of  
the  
system  
are  
described  
in  
the  
appendix.

Results  
of  
this  
study  
show  
that  
the  
method  
used  
in  
this  
study  
to  
define  
the  
requirements  
of  
the  
system  
is  
described  
in  
the  
appendix.

Some  
of  
the  
requirements  
identified  
by  
the  
method  
used  
in  
this  
study  
to  
define  
the  
requirements  
of  
the  
system  
are  
described  
in  
the  
appendix.

Results  
of  
this  
study  
show  
that  
the  
method  
used  
in  
this  
study  
to  
define  
the  
requirements  
of  
the  
system  
is  
described  
in  
the  
appendix.

Some  
of  
the  
requirements  
identified  
by  
the  
method  
used  
in  
this  
study  
to  
define  
the  
requirements  
of  
the  
system  
are  
described  
in  
the  
appendix.

Results  
of  
this  
study  
show  
that  
the  
method  
used  
in  
this  
study  
to  
define  
the  
requirements  
of  
the  
system  
is  
described  
in  
the  
appendix.

Some  
of  
the  
requirements  
identified  
by  
the  
method  
used  
in  
this  
study  
to  
define  
the  
requirements  
of  
the  
system  
are  
described  
in  
the  
appendix.

Results  
of  
this  
study  
show  
that  
the  
method  
used  
in  
this  
study  
to  
define  
the  
requirements  
of  
the  
system  
is  
described  
in  
the  
appendix.

Results  
of  
this  
study  
show  
that  
the  
method  
used  
in  
this  
study  
to  
define  
the  
requirements  
of  
the  
system  
is  
described  
in  
the  
appendix.

Some  
of  
the  
requirements  
identified  
by  
the  
method  
used  
in  
this  
study  
to  
define  
the  
requirements  
of  
the  
system  
are  
described  
in  
the  
appendix.

Results  
of  
this  
study  
show  
that  
the  
method  
used  
in  
this  
study  
to  
define  
the  
requirements  
of  
the  
system  
is  
described  
in  
the  
appendix.

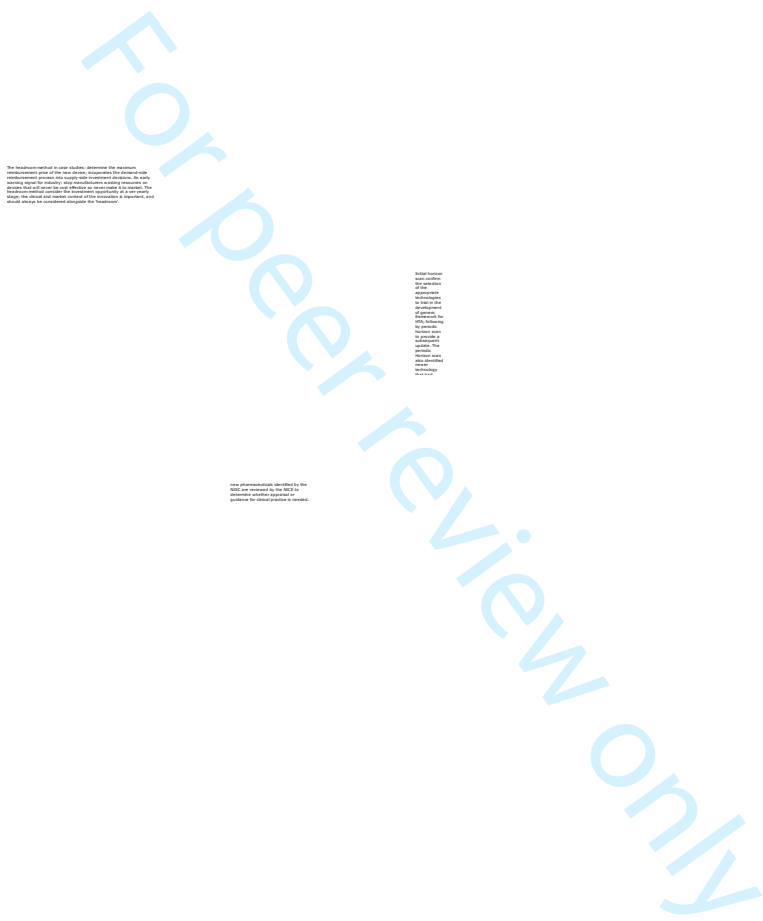



1  
2  
3  
4  
5  
6  
7  
8  
9  
10  
11  
12  
13  
14  
15  
16  
17  
18  
19  
20  
21  
22  
23  
24  
25  
26  
27  
28  
29  
30  
31  
32  
33  
34  
35  
36  
37  
38  
39  
40  
41  
42  
43  
44  
45  
46  
47  
48  
49  
50  
51  
52  
53  
54  
55  
56  
57  
58  
59  
60

submitting to BMJ Open  
You will need to create a BMJ Open account and log in to the submission system. You will also need to agree to the BMJ Open terms and conditions. For more information, please visit the BMJ Open website.

BMJ Open is a peer-reviewed journal  
of general practice research and  
education. It is published by the  
British Medical Association (BMA).  
For more information, please visit  
the BMJ Open website.

BMJ Open is a peer-reviewed journal  
of general practice research and  
education. It is published by the  
British Medical Association (BMA).  
For more information, please visit  
the BMJ Open website.

Please see other results of PubMed ID links and a  
possible journal subscription for you

BMJ Open is a peer-reviewed journal  
of general practice research and  
education. It is published by the  
British Medical Association (BMA).  
For more information, please visit  
the BMJ Open website.

BMJ Open is a peer-reviewed journal  
of general practice research and  
education. It is published by the  
British Medical Association (BMA).  
For more information, please visit  
the BMJ Open website.

BMJ Open is a peer-reviewed journal  
of general practice research and  
education. It is published by the  
British Medical Association (BMA).  
For more information, please visit  
the BMJ Open website.

BMJ Open is a peer-reviewed journal  
of general practice research and  
education. It is published by the  
British Medical Association (BMA).  
For more information, please visit  
the BMJ Open website.

BMJ Open is a peer-reviewed journal  
of general practice research and  
education. It is published by the  
British Medical Association (BMA).  
For more information, please visit  
the BMJ Open website.

BMJ Open is a peer-reviewed journal  
of general practice research and  
education. It is published by the  
British Medical Association (BMA).  
For more information, please visit  
the BMJ Open website.

BMJ Open is a peer-reviewed journal  
of general practice research and  
education. It is published by the  
British Medical Association (BMA).  
For more information, please visit  
the BMJ Open website.

BMJ Open is a peer-reviewed journal  
of general practice research and  
education. It is published by the  
British Medical Association (BMA).  
For more information, please visit  
the BMJ Open website.

BMJ Open is a peer-reviewed journal  
of general practice research and  
education. It is published by the  
British Medical Association (BMA).  
For more information, please visit  
the BMJ Open website.

BMJ Open is a peer-reviewed journal  
of general practice research and  
education. It is published by the  
British Medical Association (BMA).  
For more information, please visit  
the BMJ Open website.

Word cloud (Word)

Word cloud (Word)



## Full Mapping

The process outlined in the EuroScan Method toolkit was used as a basis and novel methodological aspects found in the literature added (9). The resulting map is segmented into: signal identification and detection, criteria and methods of filtration and prioritization, assessment, dissemination and updating of information, and overall evaluation of the process. Notable references are given; the full dataset is provided in S1 Appendix.

## Information sources and signal detection

Signals are detected from manifold sources in a horizon scanning exercise; Table 1 summarises the most common origins of information.

|                                               |
|-----------------------------------------------|
| <b>Information sources (signal detection)</b> |
|-----------------------------------------------|

- Scientific/biomedical literature review
- Patents
- Input from industry and industry associations
- Other observatories
- Media
- International institutions and forums
- Individuals, committees and expert groups
- Surveys
- Government bodies
- Meetings and conferences
- Other organisations
- Grey literature

**Table 1: Information sources used for signal detection in horizon-scanning**

Review of the scientific and biomedical literature is perhaps the most common place to identify innovation and novel methodologies emerging (primarily) from academic research laboratories. Searches can be structured, using systematic and validated strategies, for broad or targeted topic areas (17-19); a two-step approach, first to survey the field and, second, for a 'deep dive', can be used. Recently issued patents and published patent applications (e.g., the European Patent Office (20)) represent an alternative source of early signals, particularly of innovations originating in industry (large, medium and small). Systematic and/or *ad hoc* scanning of direct or indirect information about new findings from industry or industry associations (21, 22) (such as investment of venture capital in SMEs) is also useful for monitoring of research pipelines. As are, for example, clinical trials databases (23, 24) and intelligence gathered from research infrastructures and consortia, and from university and research institute technology transfer offices.

1  
2  
3 Other observatories of potential value include repositories of innovation and trends  
4 generated from the horizon scanning outputs of international regulators and the  
5 committees and expert groups of governmental bodies, such as OECD and EuroScan  
6 (25-27). The media - print, electronic and social - generate substantial topic-specific  
7 and commercially-relevant information, available via RSS feeds (10), Twitter, Facebook,  
8 etc. (28). They also allow suggestions of signals from stakeholders. Workshops can also  
9 be useful to bring together diverse experts (chosen on the basis of their area of  
10 specialisation, breadth of knowledge, publications and commitment to the process) to  
11 discuss areas of novel science and technology and to collaboratively scan the horizon  
12 from different points of view (29). These 'sand-pit' exercises can be supplemented by  
13 participants from the scanning organisation itself, appropriate stakeholder groups,  
14 external consultants and policy-makers (30, 31). For sustainable and continuous horizon  
15 scanning, it may prove valuable to create a steering committee, think tank or "idea  
16 radar" including representatives of the aforementioned participants (32, 33).

17  
18  
19  
20  
21  
22  
23  
24  
25  
26  
27  
28  
29  
30  
31  
32 Delphi studies are widely used to pool knowledge and build consensus around emerging  
33 issues. There are two or more rounds involved: in the first, participants identify relevant  
34 issues, which are then pooled and ranked; the second round sees these issues discussed  
35 followed by their re-ranking. This process is iterated until a consensus is reached.  
36  
37  
38  
39  
40  
41  
42  
43  
44  
45  
46  
47  
48  
49  
50  
51  
52  
53  
54  
55  
56  
57  
58  
59  
60  
Several Delphi variations have been described, from more conventional workshop  
formats to the use of online tools such as Nvivo (quantitative analysis of text) or  
Wordle.net (a word cloud tool) (34). The design of a Delphi study should take into  
account the sample size and confounding factors, such as the level of conformity in the  
group (7, 35, 36).

Surveys, conducted via the web or by mail (22, 33), enable staff of an organisation,  
stakeholders and the public to be asked to identify new technologies or trends (37).  
These have proved most useful when horizon-scanning in well-defined fields (7). Semi-  
structured interviews covering a standard set of questions can also be used, with similar  
outcomes (18). However, public input was not found to be hugely productive (38).

1  
2  
3 Likewise, an attempt to establish a Wikipedia community has been largely unsuccessful  
4  
5 (38).  
6

7  
8 Finally, a number of additional sources have been identified including draft legislation  
9  
10 and policy papers from governmental bodies, the proceedings of scientific conferences  
11  
12 and symposia, professional and scientific societies, interest groups, think-tanks and  
13  
14 research funders (government, charities, venture capital, etc.), the so-called grey  
15  
16 literature where global shifts that influence society, the economy and the environment —  
17  
18 megatrends — (39) are sometimes foreseen. Google alert queries, Google Trends,  
19  
20 Google News Timeline, Google Insight, and blogs were mentioned (38, 40).  
21  
22  
23  
24  
25  
26  
27  
28  
29  
30  
31  
32  
33  
34  
35  
36  
37  
38  
39  
40  
41  
42  
43  
44  
45  
46  
47  
48  
49  
50  
51  
52

## 53 **Filtration criteria and methods**

54  
55  
56 Table 2 presents the criteria and methods commonly used to discard irrelevant signals.  
57  
58  
59  
60

| Filtration criteria (discarding irrelevant signals)                                                                                                                                                                                                                                                                                                                                                                                                           | Filtration methods                                                                                                                                                                                                   |
|---------------------------------------------------------------------------------------------------------------------------------------------------------------------------------------------------------------------------------------------------------------------------------------------------------------------------------------------------------------------------------------------------------------------------------------------------------------|----------------------------------------------------------------------------------------------------------------------------------------------------------------------------------------------------------------------|
| <ul style="list-style-type: none"> <li>• Potential impact</li> <li>• Size of affected population or global relevance</li> <li>• Novelty</li> <li>• Level of innovation</li> <li>• Evidence</li> <li>• Organisational impact</li> <li>• Plausibility</li> <li>• Levels of stakeholder and media interest</li> <li>• Policy priority</li> <li>• Stage of development</li> <li>• Ethical and social issues</li> <li>• Within time-frame of 2-15 years</li> </ul> | <ul style="list-style-type: none"> <li>• Classification criteria</li> <li>• Automated text-mining tools</li> <li>• Individual and group filtration</li> <li>• Peer review</li> <li>• Expert participation</li> </ul> |

**Table 2: Filtration criteria and methods used in horizon-scanning to discard irrelevant signals**

Several key criteria concerning a signal's potential impact were used (19, 33, 41-43):

What are the costs, and the cost-utility ratio, of resource consumption; what are the implications in terms of quality of life, burden of disease and patient safety (43, 44)?

Next, to pursue the signal, it was asked what is the size of the affected population, and is this an issue of global relevance (45)? Is the signal truly novel, for which a legislative basis does not exist (8)? What is the level of the innovation based on factors such as design, function and materials? For example, is this a new drug class or a novel treatment paradigm?

The level of evidence is a further important criterion that has been ranked using a simple traffic light system (46), where green denotes sufficient evidence to support the uptake of the signal, yellow indicates insufficient evidence to support uptake but the evidence may constitute useful information, and red implies unsupportive or insufficient evidence.

Additional criteria include (a) potential organisational impact: is this a technology that will require service reorganisation (33, 44), for example?; (b) plausibility – is uptake feasible?; (c) the level of interest of relevant stakeholders; (d) policy priority; (e) stage of development (e.g., clinical trials initiated?) (22, 42); (f) ethical and social issues; and (g) time-frame within the horizon-scanning period.

In terms of filtration methods, these may be separated into those which tag signals according to the criteria in a binary yes/no fashion, or those which use distinct or graduated categories, e.g., confirmed, likely, potential, unlikely, and questionable (24).

Automated text-mining tools can be used with databases to enable the identification, tagging and categorisation of signals and facilitate clustering and filtering (7). Individual or group filtration may be performed by organisational staff, who can also undertake, up to point, peer review that ultimately requires the participation of external experts. The latter can also be responsible for weighting signals, according to the criteria, using an evidence framework (19, 29).

## **Prioritisation criteria and methods for assessing signals**

The signals which have met the filtration criteria can then be prioritised. The prioritisation criteria which must be met, and the methods used to do so, are collected in Table 3.

| <b>Prioritisation criteria (assessing signals)</b> | <b>Prioritisation methods</b> |
|----------------------------------------------------|-------------------------------|
|----------------------------------------------------|-------------------------------|



|                                                                                                                                                                                                                                                                                                                                                                                                                                                                              |                                                                                                                                                                                                                                                                                                                                                                                 |
|------------------------------------------------------------------------------------------------------------------------------------------------------------------------------------------------------------------------------------------------------------------------------------------------------------------------------------------------------------------------------------------------------------------------------------------------------------------------------|---------------------------------------------------------------------------------------------------------------------------------------------------------------------------------------------------------------------------------------------------------------------------------------------------------------------------------------------------------------------------------|
| <ul style="list-style-type: none"> <li>• Potential impact on outcomes</li> <li>• Size make-up of the affected population</li> <li>• Expected variation of impact</li> <li>• Likely time-frame</li> <li>• Evidence of effectiveness</li> <li>• Relevance to strategic and political priorities</li> <li>• Effect on other related policies</li> <li>• Desirability</li> <li>• Factual basis</li> <li>• Requirement of availability of expertise</li> <li>• Novelty</li> </ul> | <ul style="list-style-type: none"> <li>• Qualitative approach</li> <li>• Quantitative or semi-quantitative approaches</li> <li>• Rating and ranking</li> <li>• Best-worst scaling</li> <li>• Risk analysis</li> <li>• Standardisation of signals</li> <li>• Delphi approach</li> <li>• Public consultation</li> <li>• Engagement of experts</li> <li>• Mixed methods</li> </ul> |
|------------------------------------------------------------------------------------------------------------------------------------------------------------------------------------------------------------------------------------------------------------------------------------------------------------------------------------------------------------------------------------------------------------------------------------------------------------------------------|---------------------------------------------------------------------------------------------------------------------------------------------------------------------------------------------------------------------------------------------------------------------------------------------------------------------------------------------------------------------------------|

**Table 3: Prioritisation criteria and methods used in horizon-scanning to assess signals**

Logically, the criteria consider the potential impact on outcomes, a clear example being resource consumption, and the cost of a signal (33, 41). The size and composition of the affected population are therefore important factors (33, 44, 47, 48), as well as the expected variation that may be observed between different subsets (41, 47). For the signal to be prioritised, the timeframe must be realistic (8, 33, 49), and there must be a clear, factual indication of true novelty and desirability. In addition to evidence of effectiveness, consideration must be given to the relative added-value over current practice (33), and whether this sufficient to satisfy strategic and/or political priorities and policies (e.g., reduction in inequality (41)).

1  
2  
3 With respect to prioritisation methods, a simple qualitative approach uses short  
4 summaries of the signals as a basis to prioritise (50). Quantitative or semi-quantitative  
5 approaches are obviously more rigorous and typical. A straightforward rating and  
6 ranking can be undertaken using readily available online statistical tools; for example,  
7 according to median scores (28, 37), or by rating signals as gold, silver or bronze (51),  
8 or by application of a 7-point Likert scale. Prioritisation groupings (e.g., high, medium,  
9 low) can be extracted from the rankings and reliability of the results can be assessed  
10 using the intra-class correlation coefficient (19).

11  
12  
13 Another technique, best-worst scaling allows the views of experts to be ranked, via  
14 calculation of best-worst scores, square root estimates and conditional Logistic  
15 Regression (52). Risk prioritization, risk analysis, and multi-criteria decision analysis are  
16 further, more quantitative methods. The latter, for example, assigns objective  
17 weightings to different aspects of probability, impact, and other criteria, which can be  
18 used separately in rating signals (53). These ratings can then be used to rank and re-  
19 rank the signals in an iterative and discursive process taking into account and trading off  
20 weightings based on stakeholder preferences (as identified, for example, in symposia or  
21 workshops) (54).

22  
23  
24 Signal scores from different raters can be standardised via the Z-statistic and agreement  
25 (or divergence) between the resulting values can be assessed using Kendall's coefficient  
26 of concordance (W), a non-parametric statistic that has values from 0 (no agreement) to  
27 1 (complete agreement) (55).

28  
29  
30 A Delphi approach has been developed to acquire expert input online in a continuous  
31 feedback forum or market place. Participants prioritise, or purchase, a limited number of  
32 signals which then accrue a "price" that can ultimately be used to prioritise those of  
33 greatest value (32). Controls are possible to counteract the possibility of scoring fatigue  
34 (56).

1  
2  
3 Clustering and Likert-scale scoring has been used as a mixed qualitative and quantitative  
4 method (57). Wordle.net has also been applied to the prioritisation of signals based on  
5 the frequency with which they appear in cloud-based searches.  
6  
7

8  
9 Finally, it should be emphasised that the engagement of experts for prioritisation must  
10 ensure diverse participation from different sectors, geographical regions, disciplines, and  
11 demographics (28, 42, 53). Public consultation is a valuable asset to provide input and  
12 involvement from citizens and users in prioritisation, and can be achieved in person, via  
13 email or online (33, 38).  
14  
15  
16  
17  
18  
19  
20  
21  
22  
23  
24  
25  
26  
27  
28  
29  
30  
31  
32  
33  
34  
35  
36  
37  
38  
39  
40  
41  
42  
43  
44  
45  
46  
47  
48

## Signal assessment and methods

49  
50  
51 The signals which have met the prioritisation criteria are then assessed. The factors  
52 assessed, and the methods employed to do so, are in Table 4. (e.g., in terms of resource  
53 implications and broad financial perspectives).  
54  
55  
56  
57

| Signal assessment | Assessment methods |
|-------------------|--------------------|
|-------------------|--------------------|

|                                                                                                                                                                                                                                                                                                                                                                |                                                                                                                                                                                                      |
|----------------------------------------------------------------------------------------------------------------------------------------------------------------------------------------------------------------------------------------------------------------------------------------------------------------------------------------------------------------|------------------------------------------------------------------------------------------------------------------------------------------------------------------------------------------------------|
| <ul style="list-style-type: none"> <li>• Impact, e.g., resource (financial) implications</li> <li>• Level of innovation</li> <li>• Expected utilisation and diffusion</li> <li>• Risk assessment</li> <li>• Actions required and time to impact</li> <li>• Legal and ethical issues</li> <li>• Barriers to market</li> <li>• Stakeholder perception</li> </ul> | <ul style="list-style-type: none"> <li>• ExpertLens</li> <li>• Driver analysis</li> <li>• Scenario planning</li> <li>• Expert, user and policy-maker participation</li> <li>• Peer review</li> </ul> |
|----------------------------------------------------------------------------------------------------------------------------------------------------------------------------------------------------------------------------------------------------------------------------------------------------------------------------------------------------------------|------------------------------------------------------------------------------------------------------------------------------------------------------------------------------------------------------|

**Table 4: Signal assessment and methods used in horizon-scanning**

A key factor to consider in the assessment of any signal, of course, are the resource implications. The expected utilisation and availability of the innovation across different geographical regions is also important (31, 33, 44), as is a detailed risk assessment. A number of practical issues must also be considered, including actions needed to translate the signal into use (such as further research, the development of new processes, and whether complementary technology, for example, is essential to realise the value of the signal), the time and investment required to do so, the need for new or specialised training of personnel involved (8), the cooperation and acceptance of key stakeholders, any ethical issues, access to the necessary experts (7) and the intellectual property associated with the signal, and whether legislative or regulatory guideline changes are required. As always, impact on the market must be taken into consideration: is the innovation likely to have a disruptive effect, will it encounter reimbursement barriers, what are the timelines and milestones (32), etc.? A consensus level of innovation can be sought (e.g., important, moderate, modest (58)).

Insofar as the methods used for signal assessment are concerned, a number of approaches are available. ExpertLens (Rand Corporation), for example, is an iterative,

1  
2  
3 online system that permits a large group of people with different levels of expertise in  
4 different areas to independently, or collaboratively, identify, rate, prioritise, review and  
5 revise their opinions on important issues (59). Driver analysis is a process to identify  
6 and group trends, to determine the drivers of these trends, and to characterise the  
7 relationship between the drivers (60, 61). Multiple linear regression is used to find the  
8 probable links between causes and effects and other tools, such as spidergrams, can  
9 generate new perspectives (57). Scenario planning involves the creation of scenarios  
10 (e.g., best and worst cases) to assess the impact of signals (33). The headroom method  
11 can be applied to the determination of the maximum value of an emerging innovation  
12 (56). Methods should ensure the use of discounting and sensitivity analysis (62).  
13 Leveraging the participation of experts, users and policy-makers is an additional and  
14 valuable method by which to reach consensus about the value of a particular signal  
15 (e.g., via face-to-face workshops, remotely, or online (33)). A typical approach might  
16 involve a working group of experts that provides oversight and rotates responsibility for  
17 assessment (44) using, perhaps, tools such as ExpertLens, Delphi, the Nominal Group  
18 Technique and crowdsourcing (36). With respect to users of the potential innovation,  
19 their views are recognised as important: patients' assessment of impact on quality of life  
20 being an example (38). Finally, peer review and the early and ongoing involvement of  
21 experts with policymakers and stakeholders (7) can clearly facilitate both the  
22 communication and comparison against other horizon-scanning results (37, 44) and the  
23 translation of the signals into actions (7).  
24  
25  
26  
27  
28  
29  
30  
31  
32  
33  
34  
35  
36  
37  
38  
39  
40  
41  
42  
43  
44  
45  
46

## 47 **Dissemination and evaluation of the results of horizon**

### 48 **scanning**

49  
50  
51  
52  
53 The key elements involved in the disseminating and evaluating the results of horizon  
54 scanning are listed in Table 5.  
55  
56

|                      |                   |
|----------------------|-------------------|
| <b>Dissemination</b> | <b>Evaluation</b> |
|----------------------|-------------------|

|                                                               |                                                                                 |
|---------------------------------------------------------------|---------------------------------------------------------------------------------|
| <ul style="list-style-type: none"> <li>• Format</li> </ul>    | <ul style="list-style-type: none"> <li>• Short, medium and long-term</li> </ul> |
| <ul style="list-style-type: none"> <li>• Methods</li> </ul>   | <ul style="list-style-type: none"> <li>• Process and output audit</li> </ul>    |
| <ul style="list-style-type: none"> <li>• Audience</li> </ul>  | <ul style="list-style-type: none"> <li>• Validation and sensitivity</li> </ul>  |
| <ul style="list-style-type: none"> <li>• Frequency</li> </ul> | <ul style="list-style-type: none"> <li>• Focus groups</li> </ul>                |
| <ul style="list-style-type: none"> <li>• Updating</li> </ul>  | <ul style="list-style-type: none"> <li>• Metrics</li> </ul>                     |
|                                                               | <ul style="list-style-type: none"> <li>• Access to database</li> </ul>          |

**Table 5: Dissemination and evaluation of the results of horizon-scanning**

In terms of dissemination, the assessment of an individual signal can be summarised in a document with the following elements: authors, lay summary, assessment objectives and methods, background and current practice, signal description, impacts and other issues, estimated time to impact, comparator signals (innovations), expert opinion, and declaration of any conflict of interests. It may also be beneficial to include policy recommendations which are linked to decision-making priorities, structures, and individual and cross-cutting policies (17, 29, 37, 44, 48). Dissemination can be achieved, when a new report is available, via numerous pathways, including email, social media, notification of target groups (38, 42), public events involving the participation of policymakers (7, 33), publicly-accessible repositories of data or outputs that are clearly indexed, easily searchable and categorised, for example, by level of evidence and other metrics (40, 63).

The audience for dissemination is self-evident: internal staff and management; local and/or central government; institutions, agencies and relevant committees (42, 48, 58); research funding bodies (64); practitioners and (e.g.) healthcare system managers (37, 42); industry and other stakeholders (65). Dissemination of any new report should be made systematically through diverse platforms (42) and shared directly with relevant organisations (40). The frequency of dissemination depends on circumstances and examples available include on a quarterly basis (48) or the release of up to 1 to 3 reports per quarter (42); alternatively, information may be released at set time-points,

1  
2  
3 such as those corresponding to the accomplishment of milestones towards (or the time  
4 until) the expected introduction of an innovation (19).  
5  
6

7  
8 A related activity that bridges dissemination and evaluation is the updating of horizon-  
9 scanning information. This comprises four essential elements: (a) continually checking  
10 and pruning sources based on their usefulness, relevance, and evolution, (b) monitoring  
11 and updating changes in signals by periodically refreshing the horizon scan, (c)  
12 reassessment of signals when sufficient new data are available or a step-change in  
13 technology has occurred, (d) validating annually, for example, the horizon-scanning  
14 update by a team of expert researchers, practitioners and journalists.  
15  
16

17  
18 Evaluation of the results of horizon-scanning can be performed in the short, medium and  
19 long-term. A short-term evaluation may involve the following actions: survey of an  
20 appropriate audience on the usefulness of horizon-scanning in decision-making; use of  
21 metrics (e.g., provided by Google Analytics), such as number of downloads, page views,  
22 average session duration, citations in publications and funding applications; reports of  
23 failures; consistency with other horizon scanning methods. In the medium-term, an  
24 evaluation would include the responsiveness of the horizon-scanning team to requests;  
25 the ability to keep the horizon-scanning content up-to-date; to compare findings with  
26 "gold" standards (e.g., EuroScan, The Agency for Healthcare Research and Quality); and  
27 to measure sensitivity and associated predictive value. Finally, a long-term evaluation  
28 assesses the usage of horizon-scanning information in arriving at decisions; the accuracy  
29 of projections; the timeliness with which new technologies were detected; the  
30 prioritisation criteria which best signalled the impact of the technology.  
31  
32

33  
34 A process and output audit represents another approach to evaluation and ensures the  
35 completeness of the search record; records of external input; records of expert contact  
36 details; clear filing of information used; and a clear statement of the innovation in the  
37 briefing. A focus group of users can be employed to review the information input and  
38 dissemination and to develop a user-friendly interface through which to access the  
39 database.  
40  
41  
42  
43  
44  
45  
46  
47  
48  
49  
50  
51  
52  
53  
54  
55  
56  
57  
58  
59  
60

1  
2  
3  
4  
5  
6  
7  
8  
9  
10  
11  
12  
13  
14  
15  
16  
17  
18  
19  
20  
21  
22  
23  
24  
25  
26  
27  
28  
29  
30  
31  
32  
33  
34  
35  
36  
37  
38  
39  
40  
41  
42  
43  
44  
45  
46  
47  
48  
49  
50  
51  
52  
53  
54  
55  
56  
57  
58  
59  
60

For peer review only



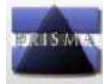

# PRISMA 2009 Checklist

| Section/topic             | #  | Checklist item                                                                                                                                                                                                                                                                                              | Reported on page # |
|---------------------------|----|-------------------------------------------------------------------------------------------------------------------------------------------------------------------------------------------------------------------------------------------------------------------------------------------------------------|--------------------|
| <b>TITLE</b>              |    |                                                                                                                                                                                                                                                                                                             |                    |
| Title                     | 1  | Identify the report as a systematic review, meta-analysis, or both.                                                                                                                                                                                                                                         | 1                  |
| <b>ABSTRACT</b>           |    |                                                                                                                                                                                                                                                                                                             |                    |
| Structured summary        | 2  | Provide a structured summary including, as applicable: background; objectives; data sources; study eligibility criteria, participants, and interventions; study appraisal and synthesis methods; results; limitations; conclusions and implications of key findings; systematic review registration number. | 3                  |
| <b>INTRODUCTION</b>       |    |                                                                                                                                                                                                                                                                                                             |                    |
| Rationale                 | 3  | Describe the rationale for the review in the context of what is already known.                                                                                                                                                                                                                              | 5                  |
| Objectives                | 4  | Provide an explicit statement of questions being addressed with reference to participants, interventions, comparisons, outcomes, and study design (PICOS).                                                                                                                                                  | 5                  |
| <b>METHODS</b>            |    |                                                                                                                                                                                                                                                                                                             |                    |
| Protocol and registration | 5  | Indicate if a review protocol exists, if and where it can be accessed (e.g., Web address), and, if available, provide registration information including registration number.                                                                                                                               | N/A                |
| Eligibility criteria      | 6  | Specify study characteristics (e.g., PICOS, length of follow-up) and report characteristics (e.g., years considered, language, publication status) used as criteria for eligibility, giving rationale.                                                                                                      | 6                  |
| Information sources       | 7  | Describe all information sources (e.g., databases with dates of coverage, contact with study authors to identify additional studies) in the search and date last searched.                                                                                                                                  | 6                  |
| Search                    | 8  | Present full electronic search strategy for at least one database, including any limits used, such that it could be repeated.                                                                                                                                                                               | 6                  |
| Study selection           | 9  | State the process for selecting studies (i.e., screening, eligibility, included in systematic review, and, if applicable, included in the meta-analysis).                                                                                                                                                   | 6-7                |
| Data collection process   | 10 | Describe method of data extraction from reports (e.g., piloted forms, independently, in duplicate) and any processes for obtaining and confirming data from investigators.                                                                                                                                  | 7                  |
| Data items                | 11 | List and define all variables for which data were sought (e.g., PICOS, funding sources) and any assumptions and                                                                                                                                                                                             | 9                  |

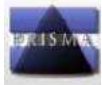

# PRISMA 2009 Checklist

|                                    |    |                                                                                                                                                                                                                        |                                                                                                                                                                                                                                                                                                                                                                                                                                                                                                                                                                                                                                                                                                                                                                                                                                                                                                                                      |
|------------------------------------|----|------------------------------------------------------------------------------------------------------------------------------------------------------------------------------------------------------------------------|--------------------------------------------------------------------------------------------------------------------------------------------------------------------------------------------------------------------------------------------------------------------------------------------------------------------------------------------------------------------------------------------------------------------------------------------------------------------------------------------------------------------------------------------------------------------------------------------------------------------------------------------------------------------------------------------------------------------------------------------------------------------------------------------------------------------------------------------------------------------------------------------------------------------------------------|
|                                    |    | simplifications made.                                                                                                                                                                                                  |                                                                                                                                                                                                                                                                                                                                                                                                                                                                                                                                                                                                                                                                                                                                                                                                                                                                                                                                      |
| Risk of bias in individual studies | 12 | Describe methods used for assessing risk of bias of individual studies (including specification of whether this was done at the study or outcome level), and how this information is to be used in any data synthesis. | <p>Risk of bias was assessed in accordance with the BMJ guidelines and the Cochrane risk of bias tool. Most bias were not applicable to these non-clinical qualitative studies, however the following were:</p> <ul style="list-style-type: none"> <li>- A form of publication bias was likely in which only horizon scanning undertaken in organisations with a strong background in publishing academic publications were discovered. It was not possible to correct for this.</li> <li>- Outcome bias may have occurred as the papers reported systematic methodological aspects of horizon scanning, whereas some horizon scanning may occur in an ad-hoc manner e.g. a signal discovered by word of mouth.</li> <li>- The competing interests of the authors were not considered beyond the standards of the source journals. This was because it was not thought highly relevant to the reporting of methodologies.</li> </ul> |
| Summary measures                   | 13 | State the principal summary measures (e.g., risk ratio, difference in means).                                                                                                                                          | 9                                                                                                                                                                                                                                                                                                                                                                                                                                                                                                                                                                                                                                                                                                                                                                                                                                                                                                                                    |
| Synthesis of results               | 14 | Describe the methods of handling data and combining results of studies, if done, including measures of consistency (e.g., $I^2$ ) for each meta-analysis.                                                              | 9                                                                                                                                                                                                                                                                                                                                                                                                                                                                                                                                                                                                                                                                                                                                                                                                                                                                                                                                    |

Page 1 of 2

| Section/topic               | #  | Checklist item                                                                                                                                                  | Reported on page # |
|-----------------------------|----|-----------------------------------------------------------------------------------------------------------------------------------------------------------------|--------------------|
| Risk of bias across studies | 15 | Specify any assessment of risk of bias that may affect the cumulative evidence (e.g., publication bias, selective reporting within studies).                    | 9                  |
| Additional analyses         | 16 | Describe methods of additional analyses (e.g., sensitivity or subgroup analyses, meta-regression), if done, indicating which were pre-specified.                | N/A                |
| <b>RESULTS</b>              |    |                                                                                                                                                                 |                    |
| Study selection             | 17 | Give numbers of studies screened, assessed for eligibility, and included in the review, with reasons for exclusions at each stage, ideally with a flow diagram. | 8                  |

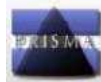

# PRISMA 2009 Checklist

|                               |    |                                                                                                                                                                                                          |                  |
|-------------------------------|----|----------------------------------------------------------------------------------------------------------------------------------------------------------------------------------------------------------|------------------|
| Study characteristics         | 18 | For each study, present characteristics for which data were extracted (e.g., study size, PICOS, follow-up period) and provide the citations.                                                             | N/A              |
| Risk of bias within studies   | 19 | Present data on risk of bias of each study and, if available, any outcome level assessment (see item 12).                                                                                                | 9 (See point 12) |
| Results of individual studies | 20 | For all outcomes considered (benefits or harms), present, for each study: (a) simple summary data for each intervention group (b) effect estimates and confidence intervals, ideally with a forest plot. | N/A              |
| Synthesis of results          | 21 | Present results of each meta-analysis done, including confidence intervals and measures of consistency.                                                                                                  | N/A              |
| Risk of bias across studies   | 22 | Present results of any assessment of risk of bias across studies (see Item 15).                                                                                                                          | 9                |
| Additional analysis           | 23 | Give results of additional analyses, if done (e.g., sensitivity or subgroup analyses, meta-regression [see Item 16]).                                                                                    | N/A              |
| <b>DISCUSSION</b>             |    |                                                                                                                                                                                                          |                  |
| Summary of evidence           | 24 | Summarize the main findings including the strength of evidence for each main outcome; consider their relevance to key groups (e.g., healthcare providers, users, and policy makers).                     | 21-22            |
| Limitations                   | 25 | Discuss limitations at study and outcome level (e.g., risk of bias), and at review-level (e.g., incomplete retrieval of identified research, reporting bias).                                            | 22               |
| Conclusions                   | 26 | Provide a general interpretation of the results in the context of other evidence, and implications for future research.                                                                                  | 23               |
| <b>FUNDING</b>                |    |                                                                                                                                                                                                          |                  |
| Funding                       | 27 | Describe sources of funding for the systematic review and other support (e.g., supply of data); role of funders for the systematic review.                                                               | 24               |

From: Moher D, Liberati A, Tetzlaff J, Altman DG, The PRISMA Group (2009). Preferred Reporting Items for Systematic Reviews and Meta-Analyses: The PRISMA Statement. PLoS Med 6(7): e1000097. doi:10.1371/journal.pmed1000097

For more information, visit: [www.prisma-statement.org](http://www.prisma-statement.org).

# BMJ Open

## Scanning the horizon: A systematic literature review of methodologies

|                                 |                                                                                                                                                                                                                                                                                                                                                                                  |
|---------------------------------|----------------------------------------------------------------------------------------------------------------------------------------------------------------------------------------------------------------------------------------------------------------------------------------------------------------------------------------------------------------------------------|
| Journal:                        | <i>BMJ Open</i>                                                                                                                                                                                                                                                                                                                                                                  |
| Manuscript ID                   | bmjopen-2018-026764.R1                                                                                                                                                                                                                                                                                                                                                           |
| Article Type:                   | Research                                                                                                                                                                                                                                                                                                                                                                         |
| Date Submitted by the Author:   | 15-Jan-2019                                                                                                                                                                                                                                                                                                                                                                      |
| Complete List of Authors:       | Hines, Philip; European Medicines Agency, SciRS; United Nations University-Maastricht Economic and social Research institute on Innovation and Technology<br>Hui yu, Li; European Medicines Agency, SciRS<br>Guy, Richard; University of Bath - Department of Pharmacy and Pharmacology; European Medicines Agency, SciRS<br>Papaluca, Marisa ; European Medicines Agency, SciRS |
| <b>Primary Subject Heading</b>: | Health policy                                                                                                                                                                                                                                                                                                                                                                    |
| Secondary Subject Heading:      | Qualitative research                                                                                                                                                                                                                                                                                                                                                             |
| Keywords:                       | HEALTH SERVICES ADMINISTRATION & MANAGEMENT, EDUCATION & TRAINING (see Medical Education & Training), PUBLIC HEALTH, QUALITATIVE RESEARCH                                                                                                                                                                                                                                        |
|                                 |                                                                                                                                                                                                                                                                                                                                                                                  |

SCHOLARONE™  
Manuscripts

# SCANNING THE HORIZON: A SYSTEMATIC LITERATURE REVIEW OF METHODOLOGIES

## Authors:

Philip Hines<sup>1\*</sup>,

Li hui yu<sup>2</sup>,

Richard H. Guy<sup>3</sup>

Marisa Papaluca-Amati<sup>4</sup>

1 Scientific Committees Regulatory Science Strategy, the European Medicines Agency, 30 Churchill Place, Canary Wharf, London E14 5EU, United Kingdom, London, UK; United Nations University - Maastricht Economic and Social Research Institute on Innovation and Technology (UNU-MERIT); Department of International Health, Faculty of Health, Medicine and Life Sciences (FHLM), Maastricht University UNU-MERIT, Maastricht, Netherlands;  
Email: [Philip.hines@ema.europa.eu](mailto:Philip.hines@ema.europa.eu);  
Telephone: +442036606048

2 Maastricht University, Maastricht, Netherlands; Scientific Committees Regulatory Science Strategy, the European Medicines Agency, London, UK

3 University of Bath, UK; Scientific Committees Regulatory Science Strategy, the European Medicines Agency, London, UK

4 Scientific Committees Regulatory Science Strategy, the European Medicines Agency, London, UK

\*Corresponding author

**Word count:** 4102

## ABSTRACT

**Objectives:** Society is confronted with the rapid emergence of innovation in science and technology. To manage this, horizon scanning is being adopted globally to identify, assess and prioritise innovations and trends at an early stage of their development. This enables decision-makers to be better informed and to prepare for change. The aim of this paper is to systematically identify and evaluate horizon scanning methodologies employed in the healthcare and biomedical fields.

**Methods:** A systematic literature review was performed using PubMed and Embase, and was supplemented with grey literature searches (2008 to 2018). The principal methodologies used in horizon scanning were extracted.

**Results:** Approximately 100 articles were summarised in a literature map. The search revealed many examples of horizon scanning across disciplines. Challenges, such as the need to refine prioritisation criteria, manage uncertainty inherent in the findings, and improve the dissemination of identified issues, have been highlighted.

**Conclusion:** Horizon scanning, when performed appropriately, is a flexible and potentially reliable tool, with a wide variety of methods. Horizon scanning can inform and influence decision-making, through identifying opportunities and challenges, from an organisational to an international level. Further research to identify the most effective methodologies available would add depth to this landscape and enable the evolution of best practice to most efficiently anticipate novel developments and innovations.

## Strengths and limitations of this study

- This systematic review offers an up-to-date perspective on horizon scanning methodologies – incorporating practices from a number of different fields; however, as reviews into horizon scanning in healthcare have been undertaken previously, some duplication of findings was inevitable.
- A detailed evaluation, and a more practical guide to all the methodologies, could not be performed for practical reasons; specifically, the inconsistent reporting of the horizon-scanning details and their efficacy, and the continually evolving approaches employed.
- The paper may be subject to omission bias as the literature reported systematic methodological aspects of horizon scanning; therefore, some ad-hoc horizon scanning methods may not be captured.

## INTRODUCTION

Across organizations worldwide, the rapid emergence of high impact innovation is a major challenge faced by decision makers <sup>1</sup>. To respond, the identification of future innovations and trends is being undertaken in a comprehensive, systematic and sustainable manner so that policy makers, and other stakeholders, can respond appropriately and enable innovations to reach the market with minimal developmental, legal, regulatory, process or procurement bottle-necks. To catalyse the achievement of this objective, horizon scanning is emerging as a valuable and viable strategy. This is particularly true in the health sector, where the European Medicines Agency (EMA) is seeking to promote the availability of innovative medicines using horizon scanning. This foresight will in turn inform the Agency's Regulatory Science Strategy and the European medicines regulatory network strategy <sup>2-4</sup>.

Horizon scanning has been in use for many years, initially by commercial organisations and later by public bodies; Japan was an early adopter of foresight methodologies in the 1970s <sup>5</sup> <sup>6</sup>. Since then, horizon scanning has been used across diverse sectors to aid financial, policy, process and research planning <sup>7</sup> <sup>8</sup>. There are many definitions of horizon scanning <sup>9</sup> <sup>10</sup>, but most can be captured by its generic characterisation as a systematic examination of information sources to detect early signs of important developments. The approach generally targets the early lifecycle of technologies – i.e., in an early phase of adoption before their introduction onto the market - but may also scan for broader trends, challenges and opportunities. It provides an early warning of 'signals', rather than a comprehensive study of their impact.

Horizon scanning generally follows a process of signal detection, filtration, prioritisation, assessment and dissemination (Fig 1). Its use is growing across sectors <sup>11</sup>, and this risks the duplication of efforts (both in design and execution) as similar stretches of the horizon are scanned by many.



1  
2  
3  
4  
5  
6 **Fig 1. Common stages of Horizon scanning from the EuroScan network** <sup>9</sup>.

7  
8 This figure is licensed under the Creative Commons Attribution-NonCommercial-ShareAlike  
9  
10 4.0 International License (CC BY-NC-SA 4.0).

11  
12  
13 There have been no recent reviews of horizon scanning methods used in the health sector <sup>9</sup>  
14  
15 <sup>12</sup>, or those looking at broader biomedical sectors <sup>6 7 12-14</sup>. As a result, the aim of this  
16  
17 literature review is to systematically identify and evaluate horizon scanning methodologies  
18  
19 employed in the healthcare and biomedical fields. The overall goal is to broaden and update  
20  
21 knowledge on the methodologies used, and through mapping and evaluation, provide a  
22  
23 useful guide for the establishment and optimisation of future horizon scanning initiatives.  
24  
25 This includes the activities of the EMA's recently established Regulatory Science  
26  
27 Observatory, as well other international efforts to reduce duplication including the EU  
28  
29 Innovation offices Network, the European Network for Health Technology Assessment, and  
30  
31 the International Coalition of Medicines Regulatory Authorities (ICMRA) <sup>4 15</sup>.

32  
33  
34  
35  
36  
37  
38  
39  
40  
41  
42  
43  
44  
45  
46  
47  
48  
49  
50  
51  
52  
53  
54  
55  
56  
57  
58  
59  
60

## METHODS

A systematic review of the literature was performed to capture and map the use of horizon scanning activity, and the widespread use of modern IT/web capabilities, over the period from 2008 to 2018 (see supplementary file 1) <sup>16</sup>. Three researchers were involved and a systematic protocol was followed to minimise inter-rater bias; this involved cross validation between two researchers, with diverging opinions then arbitrated by the third. This systematic approach also permitted gaps and inconsistencies in the field to be identified. Data collection followed the Preferred Reporting Items for Systematic Reviews and Meta-Analyses (PRISMA) guidelines <sup>17</sup>; the literature was first screened and filtered using inclusion and exclusion criteria; the accepted papers then underwent data extraction and analysis; and, finally, the scanning methodologies were mapped.

### Search strategy

Medline and Embase bibliographic databases were searched to identify research papers on the use of horizon scanning, and the methods used for this purpose. The date range was between 2018-01-01 and 2018-07-04. The final search took place on 2018-07-04. Grey literature and bibliographies of the most relevant research papers supplemented this search. The primary search terms used were derived from previous literature: "horizon scan\*" OR "strategic foresight\*" OR "systematic early dialogue\*" OR "early warning and alert system\*". All literature, of which the title or abstract contained any of the keywords above, was flagged.

### Inclusion and exclusion criteria

Only articles published in English or Italian from 2008-2018 were included. In the first round of quality appraisal and screening (see supplementary file 1), the publication abstracts or title had to indicate:

1  
2  
3 (a) either a methodology for horizon scanning or strategic foresight, or a discussion, or  
4 experience provided, of horizon scanning;

5  
6  
7 (b) a breadth of horizon scanning of the relevant field or address a methodological  
8 aspect which may be generally applicable across different fields.  
9

10  
11  
12 In the second round, the full texts of the selected articles were then reviewed according to  
13 additional inclusion criteria:

14  
15  
16 (a) the horizon scan or foresight methodology was detailed, and

17  
18  
19 (b) the priority areas included relevant science and/or technology, and

20  
21  
22 (c) a collaborative/international approach was used, and

23  
24  
25 (d) the horizon scanning undertaken spanned a period of between 2 and 15 years.  
26

27 Alternatively, the paper was required to demonstrate methodological aspect(s) of foresight  
28 or horizon scanning of potentially general applicability.

29  
30  
31 The foresight period of 2-15 years reflected the fact that signals suggesting impact in less  
32 than two years concern innovations that are already in late-stage development, while those  
33 anticipated to 'mature' in 15-20 years' time are too distant and uncertain to be useful. A  
34 collaborative/international approach was sought because of the global nature of innovation  
35 and change.  
36  
37  
38  
39  
40  
41

42 The mapping was elaborated using the EuroScan International Information Network  
43 method, a scientific association of member organizations and individuals for the exchange of  
44 information on important emerging new drugs, devices, procedures, programs, and settings  
45 in health care (EuroScan), and novel methodological aspects from the searched literature <sup>9</sup>.  
46  
47  
48  
49  
50

## 51 **Patient and Public Involvement**

52  
53  
54 The patients and public were not directly involved in the design or conduct of the study.  
55  
56  
57  
58  
59  
60

## RESULTS

There were 413 papers identified through the initial database searches and grey literature, of which 252 were removed due to duplication or failing to meet the inclusion criteria. 60 papers were excluded because of language issues or lack of access to full-text. 101 publications were included in this study after reading the full text as indicated (Fig. 2).

### Fig 2. Literature selection process flowchart <sup>17</sup>

Consistency between the selection of papers by the two researchers, who undertook the screening, was fair (Cohen's unweighted Kappa = 0.28) <sup>18</sup>. A third researcher therefore screened the excluded literature according to the criteria to ensure that all relevant papers were captured (and resulting in one further publication being selected).

Most of the studies included in this review address horizon scanning as whole, following the process outlined in Fig. 1, and of these, many operate in a national context. A few papers also focus on the use of specific methodological aspects such as Delphi techniques (see Table 1). Given the databases interrogated, the most prevalent priority areas identified were environmental issues (<sup>9</sup>), gene therapy (8), oncology (9) and clinical practice. Public sector bodies in the UK, USA, Sweden and Australia published most often on the topic. Internationally, EuroScan was repeatedly referenced for its role in harmonizing horizon scanning methodology, supporting its members and encouraging international collaboration. Risk of bias was assessed in accordance with the BMJ guidelines and the Cochrane risk of bias tool <sup>19</sup>. While bias was not typically found in these non-clinical qualitative studies, there were three exceptions:

- 1  
2  
3 - A form of publication bias was likely in which only horizon scanning undertaken in  
4 organisations with a strong background in publishing academic publications and  
5 transparency were discovered. It was not possible to correct for this.  
6  
7  
8  
9  
10 - Omission bias may have occurred as the papers reported systematic methodological  
11 aspects of horizon scanning; however, some horizon scanning may occur in an ad-hoc  
12 manner, e.g., a signal discovered by word-of-mouth.  
13  
14  
15  
16 - The competing interests of the authors were not considered beyond the standards of the  
17 source journals. This was because it was not thought highly relevant to the reporting of  
18 methodologies. This was because it was not thought highly relevant to the reporting of  
19 methodologies.  
20  
21  
22

## 23 **Mapping**

24  
25  
26 The process outlined in the EuroScan Method toolkit was used as a basis and novel  
27 methodological aspects found in the literature were added <sup>9</sup>. The resulting map is  
28 segmented into: signal identification and detection, criteria and methods of filtration and  
29 prioritisation, assessment, dissemination and updating of information, and overall  
30 evaluation of the process. Notable references are given and the full dataset is provided in  
31 the supplementary file 2.  
32  
33  
34  
35  
36  
37  
38

## 39 **Information sources and signal detection**

40  
41  
42 Signals are detected from manifold sources in a horizon scanning exercise; Table 1  
43 summarises the most common.  
44  
45

46  
47 Review of the scientific and biomedical literature is perhaps the most common place to  
48 identify innovation. Searches can be structured, using systematic and validated strategies,  
49 for broad or targeted topic areas <sup>20-22</sup>; a two-step approach, first to survey the field and,  
50 second, for a 'deep dive', can be used. Recently issued patents and published patent  
51 applications (e.g., the European Patent Office) <sup>23</sup> represent an alternative source of early  
52  
53  
54  
55  
56  
57  
58  
59  
60

signals, particularly of innovations originating in industry (large, medium and small).

Systematic and/or ad hoc scanning of direct or indirect information about new findings from industry or industry associations <sup>24 25</sup> (such as investment of venture capital in SMEs) is also useful for monitoring research pipelines. Similarly, other sources, such as clinical trials databases <sup>26 27</sup> and intelligence gathered from research infrastructures and consortia, and from university and research institute technology transfer offices, are valuable.

#### Information sources (signal detection)

- Scientific/biomedical literature review
- Patents
- Input from industry and industry associations
- Other observatories
- Media
- International institutions and forums
- Individuals, committees and expert groups
- Surveys
- Government bodies
- Meetings and conferences
- Other organisations
- Grey literature

**Table 1: Information sources used for signal detection in horizon-scanning**

Additional observatories of potential value include repositories of innovation and trends generated from the horizon scanning outputs of international regulators and the committees and expert groups of governmental bodies, such as OECD and EuroScan <sup>28-30</sup>. The media -

1  
2  
3 print, electronic and social - generate substantial topic-specific and commercially-relevant  
4 information, available via RSS feeds <sup>11</sup>, Twitter, Facebook, and so on <sup>31</sup>. Social media also  
5 provide signal suggestions from stakeholders. Workshops can also be useful to bring  
6 together diverse experts (chosen on the basis of their area of specialisation, breadth of  
7 knowledge, publications and commitment to the process) to discuss areas of novel science  
8 and technology and to collaboratively scan the horizon from different points of view <sup>32</sup>.

9 These 'sand-pit' exercises can be supplemented by participants from the scanning  
10 organisation itself, appropriate stakeholder groups, external consultants and policy-makers  
11 <sup>33 34</sup>. For sustainable and continuous horizon scanning, it may prove valuable to create a  
12 steering committee, think tank or "idea radar" including representatives of the  
13 aforementioned participants <sup>12 35</sup>.

14  
15 Delphi studies are widely used to pool knowledge and build consensus around emerging  
16 issues. There are two or more rounds involved. In the first, participants identify relevant  
17 issues, which are then pooled and ranked; the second round sees these issues discussed  
18 followed by their re-ranking. This process is iterated until a consensus is reached. Several  
19 Delphi variations have been described, from more conventional workshop formats to the use  
20 of online tools such as Nvivo (quantitative analysis of text) or Wordle.net (a word cloud  
21 tool) <sup>36</sup>. The design of a Delphi study should take into account the sample size and  
22 confounding factors, such as the level of conformity in the group <sup>7 37 38</sup>.

23  
24 Surveys, conducted via the web or by mail <sup>12 25</sup>, enable staff of an organisation,  
25 stakeholders and the public to be asked to identify new technologies or trends <sup>39</sup>. These  
26 may be most useful when horizon-scanning in well-defined fields <sup>7</sup>. Semi-structured  
27 interviews covering a standard set of questions can also be used, with similar outcomes <sup>21</sup>.  
28 However, public input was not found to be hugely productive in topic identification <sup>40</sup>.  
29 Likewise, an attempt to establish a Wikipedia community has been largely unsuccessful <sup>40</sup>.

1  
2  
3 Finally, a number of additional sources have been identified including draft legislation and  
4 policy papers from governmental bodies, the proceedings of scientific conferences and  
5 symposia, professional and scientific societies, interest groups, think-tanks and research  
6 funders (government, charities, venture capital, etc.), the so-called grey literature where  
7 global shifts that influence society, the economy and the environment - megatrends - <sup>41</sup> are  
8 sometimes foreseen. Google alert queries, Google Trends, Google News Timeline, Google  
9 Insight, and blogs were also mentioned <sup>40 42</sup>.

## 18 **Filtration criteria and methods**

21 Table 2 presents the criteria and methods commonly used to discard irrelevant signals.

23 Several key criteria concerning a signal's potential impact were used <sup>12 22 43-45</sup> including what  
24 are the costs, and the cost-utility ratio, of resource consumption, and what are the  
25 implications in terms of quality of life, burden of disease and patient safety <sup>45 46</sup>?

30 The level of evidence is a further important criterion that has been ranked using a simple  
31 traffic light system <sup>47</sup>, where green denotes sufficient evidence to support the uptake of the  
32 signal, yellow indicates insufficient evidence to support uptake but the evidence may  
33 constitute useful information, and red implies unsupportive or insufficient evidence.

38 In terms of filtration methods, these may be separated into those which tag signals  
39 according to the criteria in a binary yes/no fashion, or those which use distinct or graduated  
40 categories, e.g., confirmed, likely, potential, unlikely, and questionable <sup>27</sup>. Automated text-  
41 mining tools can be used with databases to enable the identification, tagging and  
42 categorisation of signals and facilitate clustering and filtering <sup>7</sup>. Individual or group filtration  
43 may be performed by organisational staff, who can also undertake some initial peer review  
44 that is ultimately performed in-depth by external experts. The latter can also contribute to,  
45 or determine, the weighting of signals, according to the criteria, using an evidence  
46 framework <sup>22 32</sup>.



| <b>Filtration criteria (discarding irrelevant signals)</b>                                                                                                                                                                                                                                                                                                                                                                                                    | <b>Filtration methods</b>                                                                                                                                                                                            |
|---------------------------------------------------------------------------------------------------------------------------------------------------------------------------------------------------------------------------------------------------------------------------------------------------------------------------------------------------------------------------------------------------------------------------------------------------------------|----------------------------------------------------------------------------------------------------------------------------------------------------------------------------------------------------------------------|
| <ul style="list-style-type: none"> <li>• Potential impact</li> <li>• Size of affected population or global relevance</li> <li>• Novelty</li> <li>• Level of innovation</li> <li>• Evidence</li> <li>• Organisational impact</li> <li>• Plausibility</li> <li>• Levels of stakeholder and media interest</li> <li>• Policy priority</li> <li>• Stage of development</li> <li>• Ethical and social issues</li> <li>• Within time-frame of 2-15 years</li> </ul> | <ul style="list-style-type: none"> <li>• Classification criteria</li> <li>• Automated text-mining tools</li> <li>• Individual and group filtration</li> <li>• Peer review</li> <li>• Expert participation</li> </ul> |

**Table 2: Filtration criteria and methods used in horizon-scanning to discard irrelevant signals**

### **Prioritisation criteria and methods for assessing signals**

The signals which have met the filtration criteria can then be prioritised. The prioritisation criteria which must be met, and the methods used to do so, are collected in Table 3.

| <b>Prioritisation criteria (assessing signals)</b>                                                                                                                                                                                                                                                                                                                                                                                                                           | <b>Prioritisation methods</b>                                                                                                                                                                                                                                                                                                                                                   |
|------------------------------------------------------------------------------------------------------------------------------------------------------------------------------------------------------------------------------------------------------------------------------------------------------------------------------------------------------------------------------------------------------------------------------------------------------------------------------|---------------------------------------------------------------------------------------------------------------------------------------------------------------------------------------------------------------------------------------------------------------------------------------------------------------------------------------------------------------------------------|
| <ul style="list-style-type: none"> <li>• Potential impact on outcomes</li> <li>• Size make-up of the affected population</li> <li>• Expected variation of impact</li> <li>• Likely time-frame</li> <li>• Evidence of effectiveness</li> <li>• Relevance to strategic and political priorities</li> <li>• Effect on other related policies</li> <li>• Desirability</li> <li>• Factual basis</li> <li>• Requirement of availability of expertise</li> <li>• Novelty</li> </ul> | <ul style="list-style-type: none"> <li>• Qualitative approach</li> <li>• Quantitative or semi-quantitative approaches</li> <li>• Rating and ranking</li> <li>• Best-worst scaling</li> <li>• Risk analysis</li> <li>• Standardisation of signals</li> <li>• Delphi approach</li> <li>• Public consultation</li> <li>• Engagement of experts</li> <li>• Mixed methods</li> </ul> |

**Table 3: Prioritisation criteria and methods used in horizon-scanning to assess signals**

Logically, the criteria consider the potential impact on outcomes, a clear example being resource consumption, and the cost implications<sup>12 43</sup>. The size and composition of the affected population are therefore important factors<sup>12 46 48 49</sup>, as well as the expected variation that may be observed between different subsets<sup>43 48</sup>. For the signal to be prioritised, the timeframe must be realistic<sup>8 12 50</sup>, and there must be a clear, factual indication of true novelty and desirability. In addition to evidence of effectiveness,

1  
2  
3 consideration must be given to the relative added-value over current practice <sup>12</sup>, and  
4 whether this sufficient to satisfy strategic and/or political priorities and policies (e.g.,  
5 reduction in inequality) <sup>43</sup>.  
6  
7  
8  
9

10 With respect to prioritisation methods, a simple qualitative approach uses short summaries  
11 of the signals as a basis to prioritise <sup>51</sup>. Quantitative or semi-quantitative approaches are  
12 obviously more rigorous and typical.  
13  
14  
15

16 There were several novel Delphi approaches developed, for example, to acquire expert input  
17 online in a continuous feedback forum or market place. Here, participants prioritise, or  
18 purchase, a limited number of signals which then accrue a "price" that can ultimately be  
19 used to prioritise those of greatest value <sup>35</sup>. Controls are possible to counteract the  
20 possibility of scoring fatigue <sup>52</sup>.  
21  
22  
23  
24  
25  
26

27 Finally, it should be emphasised that the engagement of experts for prioritisation must  
28 ensure diverse participation from different sectors, geographical regions, disciplines, and  
29 demographics <sup>31 44 53</sup>. Public consultation is a valuable asset to provide input and  
30 involvement from citizens and users in prioritisation, and can be achieved in person, via  
31 email or online <sup>12 40</sup>.  
32  
33  
34  
35  
36  
37  
38  
39  
40  
41  
42  
43  
44  
45  
46  
47  
48  
49  
50  
51  
52  
53  
54  
55  
56  
57  
58  
59  
60

## Signal assessment and methods

The signals which have met the prioritisation criteria are then assessed. The factors assessed, and the methods employed to do so, are in Table 4 (e.g., in terms of resource implications and broad financial perspectives).

| Signal assessment                                                                                                                                                                                                                                                                                                                                              | Assessment methods                                                                                                                                                                                   |
|----------------------------------------------------------------------------------------------------------------------------------------------------------------------------------------------------------------------------------------------------------------------------------------------------------------------------------------------------------------|------------------------------------------------------------------------------------------------------------------------------------------------------------------------------------------------------|
| <ul style="list-style-type: none"> <li>• Impact, e.g., resource (financial) implications</li> <li>• Level of innovation</li> <li>• Expected utilisation and diffusion</li> <li>• Risk assessment</li> <li>• Actions required and time to impact</li> <li>• Legal and ethical issues</li> <li>• Barriers to market</li> <li>• Stakeholder perception</li> </ul> | <ul style="list-style-type: none"> <li>• ExpertLens</li> <li>• Driver analysis</li> <li>• Scenario planning</li> <li>• Expert, user and policy-maker participation</li> <li>• Peer review</li> </ul> |

**Table 4: Signal assessment and methods used in horizon-scanning**

A key factor to consider in the assessment of any signal, of course, is the resource implications. The expected utilisation and availability of the innovation across different geographical regions is also important<sup>12 34 46</sup>, as is an assessment of risk. A number of practical issues must also be considered, including actions needed to translate the signal into use (such as further research, the development of new processes, and whether complementary technology, for example, is essential to realise the value of the signal), the time and investment required to do so, the need for new or specialised training of personnel involved<sup>8</sup>, the cooperation and acceptance of key stakeholders, any ethical issues, access to the necessary experts<sup>7</sup> and the intellectual property associated with the signal, and

whether legislative or regulatory guideline changes are required. As always, impact on the market must be taken into consideration. Is the innovation likely to have a disruptive effect, will it encounter reimbursement barriers, what are the timelines and milestones<sup>35</sup>, etc.? A consensus level of innovation can be sought (e.g., important, moderate, modest)<sup>54</sup>.

Insofar as the methods used for signal assessment are concerned, a number of approaches are available.

### Dissemination and evaluation of the results of horizon scanning

The key elements involved in the disseminating and evaluating the results of horizon scanning are listed in Table 5.

| Dissemination                                                                                                                              | Evaluation                                                                                                                                                                                                                         |
|--------------------------------------------------------------------------------------------------------------------------------------------|------------------------------------------------------------------------------------------------------------------------------------------------------------------------------------------------------------------------------------|
| <ul style="list-style-type: none"> <li>• Format</li> <li>• Methods</li> <li>• Audience</li> <li>• Frequency</li> <li>• Updating</li> </ul> | <ul style="list-style-type: none"> <li>• Short, medium and long-term</li> <li>• Process and output audit</li> <li>• Validation and sensitivity</li> <li>• Focus groups</li> <li>• Metrics</li> <li>• Access to database</li> </ul> |

**Table 5: Dissemination and evaluation of the results of horizon-scanning**

In terms of dissemination, the assessment of an individual signal can be summarised in a document with the following elements: authors, lay summary, assessment objectives and methods, background and current practice, signal description, impacts and other issues, estimated time to impact, comparator signals (innovations), expert opinion, and declaration of any conflict of interests. It may also be beneficial to include policy recommendations which are linked to decision-making priorities, structures, and individual and cross-cutting

1  
2  
3 policies <sup>20 32 39 46 49</sup>. Dissemination can be achieved, when a new report is available, via  
4 numerous pathways, including email, social media, notification of target groups <sup>40 44</sup>, public  
5 events involving the participation of policymakers <sup>7 12</sup>, publicly-accessible repositories of  
6 data or outputs that are clearly indexed, easily searchable and categorised, for example, by  
7 level of evidence and other metrics <sup>42 55</sup>.  
8  
9  
10  
11  
12

13  
14 Dissemination of any new report should be made systematically through diverse platforms <sup>44</sup>  
15 and shared directly with relevant organisations <sup>42</sup>. The frequency of dissemination depends  
16 on circumstances.  
17  
18  
19

20 A related activity that bridges dissemination and evaluation is the updating of horizon-  
21 scanning information. This comprises four essential elements: (a) continually checking and  
22 pruning sources based on their usefulness, relevance, and evolution <sup>12</sup>, (b) monitoring and  
23 updating changes in signals by periodically refreshing the horizon scan <sup>49</sup>, (c) reassessment  
24 of signals when sufficient new data are available or a step-change in technology has  
25 occurred <sup>56</sup>, and (d) validating annually, for example, the horizon-scanning update by a  
26 team of expert researchers, practitioners and journalists <sup>31</sup>.  
27  
28  
29  
30  
31  
32  
33  
34

35 Evaluation of the results of horizon-scanning can be performed in the short, medium and  
36 long-term <sup>12</sup>. A short-term evaluation may involve the following actions: survey of an  
37 appropriate audience on the usefulness of horizon-scanning in decision-making; use of  
38 metrics (e.g., provided by Google Analytics), such as number of downloads, page views,  
39 average session duration, citations in publications and funding applications <sup>57</sup>; reports of  
40 failures; consistency with other horizon scanning methods. In the medium-term, an  
41 evaluation would include the responsiveness of the horizon-scanning team to requests, the  
42 ability to keep the horizon-scanning content up-to-date, comparing findings with other  
43 horizon scanning agencies/databases (e.g. EuroScan,), and measuring sensitivity and  
44 associated predictive value. Finally, a long-term evaluation assesses the usage of horizon-  
45 scanning information in arriving at decisions, the accuracy of projections, the timeliness  
46  
47  
48  
49  
50  
51  
52  
53  
54  
55  
56  
57  
58  
59  
60

1  
2  
3 with which new technologies were detected, and the prioritisation criteria which best  
4 signalled the impact of the technology <sup>54</sup>.

5  
6  
7 A process and output audit represents another approach to evaluation and ensures the  
8 completeness of the search record, records of external input and expert contact details,  
9 clear filing of information used, and a clear statement of the innovation in the briefing <sup>58</sup>. A  
10 focus group of users can be employed to review the information input and dissemination  
11 and to develop a user-friendly interface through which to access a database <sup>40 59</sup>.

## DISCUSSION

There was a wide variety of sources and methods used to identify new and emerging issues. However, it was common to use scientific literature, individuals, committees and expert groups, the web and Delphi methodologies. That the scientific literature dominates is expected as innovation often begins in an academic environment and because widely-accessible bibliographic databases have powerful search and filtering capabilities. The frequent use of the Delphi methodology may be explained by its ability to 'crowd-source' information and build a consensus amongst participants in a relatively short timeframe. This consensus, particularly expert consensus, adds weight to the conclusions drawn from horizon scanning.

Overall, the majority of the methods used were manual or semi-automated, with relatively few automated aspects. This could be due to the limited availability of software and budget constraints. Complex filtration, prioritisation and assessment criteria are some of the barriers to full automation that may be resolved in the not-too-distant future by the rapidly evolving fields of machine learning and artificial intelligence <sup>60</sup>.

Dissemination of horizon-scanning reports appear to have rarely fed directly and systematically into policymaking. This may simply be a reflection of the unpredictable and political nature of policymaking, as well as a mismatch with the longer time-scale of horizon-scanning. Equally, it is probably fair to say that the information gathered by horizon-scanning lacks, at least to some extent, the conventional measures of credibility and authority required to influence policymaking <sup>32</sup>. New tools and approaches (e.g., via generation of complex scenarios and the clear weighting of evidence) <sup>32 61</sup> are probably needed to enable horizon-scanning to be considered more seriously by policymakers.

The distance of the horizon scanned was also found to be a tricky balance between the need to assess signals as early as possible to inform decision makers, and the limited information



1  
2  
3 available at an early stage <sup>62</sup>. There were many different evaluation methods employed,  
4 covering different time-spans, reflecting *inter alia* cultural differences, resource limitations  
5 and a time-lag between horizon-scanning and its critical evaluation (for example, a high  
6 false-positive rate of horizon-scanning implied the need for tighter filtration criteria) <sup>14</sup>.  
7  
8  
9

10  
11 From a public policy standpoint, horizon-scanning has both informative and creative  
12 functions, alerting policy makers to emerging issues, and providing new, plausible policy  
13 options <sup>7</sup>. This use of horizon-scanning is well established for identification of emerging  
14 issues, both positive and negative, in global conservation and biological diversity <sup>63</sup>. In some  
15 contrast, however, in the biomedical field, in which this review has concentrated, horizon-  
16 scanning is biased towards identification of positive, innovative signals as those with low  
17 value inevitably have little impact.<sup>64</sup> Finally, in addition to its institutional value, horizon-  
18 scanning can significantly help related stakeholders, such as technology developers or civil  
19 society - it can reveal barriers to innovation and allow proactive engagement to reduce  
20 these barriers <sup>43</sup>.  
21  
22  
23  
24  
25  
26  
27  
28  
29  
30  
31

## 32 **Limitations**

33  
34  
35  
36 As systematic reviews into horizon scanning in healthcare have been undertaken previously,  
37 some duplication of findings was inevitable <sup>6 7 13 14 65</sup>; however, this review offers an up-to-  
38 date and wider perspective, and includes methodologies from beyond the health field, e.g.,  
39 conservation. Resource limitations have precluded evaluation of horizon-scanning in other,  
40 related sectors, and consideration of material in languages other than English and Italian.  
41  
42  
43  
44  
45  
46  
47  
48  
49  
50  
51  
52  
53  
54  
55  
56  
57  
58  
59  
60  
Lastly, a detailed evaluation, and a more practical guide to all the methodologies, could not  
be performed for practical reasons: the inconsistent reporting of the horizon-scanning  
details and their efficacy, and the continually evolving approaches employed. This effort  
must be viewed as a 'snapshot', therefore, of a rapidly moving target.

## Conclusions

To respond to accelerating innovation, horizon-scanning methodology is being adopted both nationally and internationally, particularly in the public sector. The range of methods used, and the limited assessment of their performance, renders recommendation of a single approach premature and explains why combining two or more techniques makes sense for validation and for improving the accuracy of predictions <sup>6 7</sup>.

Undoubtedly, automation and the development of artificially 'intelligent' horizon-scanning, which self-assesses and improves its signal management, are short-term milestones that will significantly improve the process, enhancing the evidence base, disseminating the acquired outputs efficiently, and facilitating decision-making. Self-evidently, given the need for horizon-scanning across diverse disciplines, involving large numbers of interested stakeholders with related information needs, the process can only benefit from international collaboration. To this end, initiatives are underway, including within the International Coalition of Medicines Regulatory Authorities in which the EMA is taking an active role <sup>15 66-68</sup>. Of course, scanning the horizon for signals is not an endpoint, in and of itself, but rather a window through which current and future opportunities and policies can be linked <sup>69</sup>. It is essential, therefore, that further research be performed to develop, assess and ultimately implement the most efficacious methods of scanning and to ensure their acceptance and uptake by relevant stakeholders.

## Acknowledgments

The authors are grateful to Angela Brand, Monica Ensini and Lucia D'apote for their input and assistance.

## Disclaimer

The views expressed in this article are the personal views of the authors and may not be understood or quoted as being made on behalf of or reflecting the position of the agencies or organisations with which the authors are affiliated.

## Data sharing

The dataset is available in the supplementary file 2 or upon request.

## Competing interests

We have read and understood BMJ policy on declaration of interests and declare that we have no competing interests, specifically no financial relationships with any organisations that might have an interest in the work presented here, and no other relationships or activities that could appear to have influenced the results and conclusions drawn.

## Funding

This research received no specific grant from any funding agency in the public, commercial or not-for-profit sectors.

## Author contributions:

Philip Hines, Marisa Papaluca-Amati, Li hui yu and Richard Guy all contributed to the work as follows:

- Substantial contributions to the conception or design of the work; or the acquisition, analysis, or interpretation of data; and
- Drafting and revising the paper for intellectual content; and
- Final approval of the version to be published; and
- Agreement to be accountable for all aspects of the work in ensuring that questions related to the accuracy or integrity of any part of the work are appropriately investigated and resolved.

er review only

## REFERENCES

1. Collins A. The Global Risks Report 2018. Geneva: World Economic Forum, 2018.
2. Bujar M MN, Liberti L. R&D Briefing 65: New drug approvals in six major authorities 2007 – 2016: Focus on the internationalisation of medicines. London: Centre for Innovation in Regulatory Science, 2017.
3. O'Dwyer L, Nolan L, Fisher C. Supporting Innovation through Regulation and Science: Ireland as an Innovation Hub for Health Products. *Biomedicine Hub* 2017;2(Suppl. 1):3.
4. ICMRA. Key Outcomes. ICMRA Summit October. Kyoto: International Coalition of Medicines Regulatory Authorities (ICMRA), 2017.
5. Stevens A, Packer C, Roberts G. Early warning and of new health care technologies in the United Kingdom. *International Journal of Technolgy Assessment in Health Care* 1998;14(4):680-86.
6. Doos L, Packer C, Ward D, et al. Past speculations of the future: a review of the methods used for forecasting emerging health technologies. *BMJ Open* 2016;6(3)
7. Amanatidou E, Butter M, Carabias V, et al. On concepts and methods in horizon scanning: Lessons from initiating policy dialogues on emerging issues. *Science and Public Policy* 2012;39(2):208-21. doi: 10.1093/scipol/scs017
8. Plüddemann A, Heneghan C, Thompson M, et al. Prioritisation criteria for the selection of new diagnostic technologies for evaluation. *BMC health services research* 2010;10(1):109.
9. EuroScan. A toolkit for the identification and assessment of new and emerging health technologies. Birmingham, 2014.
10. Thorne M. Sense-Making With Strategic Foresight: Scanning for Future Disruptions, 2018.

- 1  
2  
3 11. Urquhart GJ, Saunders P. Wider horizons, wiser choices: horizon scanning for public  
4 health protection and improvement. *J Public Health (Oxf)* 2017;39(2):248-53. doi:  
5 10.1093/pubmed/fdw039  
6  
7
- 8  
9 12. Sun F, Schoelles K. A systematic review of methods for health care technology horizon  
10 scanning. AHRQ Publication. Rockville (MD), 2013:1-82.  
11  
12
- 13 13. Packer C, Simpson S, Almeida RT. EuroScan International Network Member Agencies:  
14 their structure, processes, and outputs. . *International Journal of Technolgy*  
15 *Assessment in Health Care* 2015;31(1-2):78-85.  
16  
17
- 18 14. Packer C, Fung M, Stevens A. Analyzing 10 years of early awareness and alert activity in  
19 the United Kingdom. *International Journal of Technolgy Assessment in Health Care*  
20 2012;28(3):308-14.  
21  
22
- 23 15. EUnetHTA. Horizon Scanning, Topic Identification, Selection and Prioritisation for  
24 European cooperation on HTA - Draft recommendations Brussels, 2018.  
25  
26
- 27 16. Mulrow CD. Systematic Reviews: Rationale for systematic reviews. *BMJ*  
28 1994;309(6954):597-99. doi: 10.1136/bmj.309.6954.597  
29  
30
- 31 17. Moher D, Liberati A, Tetzlaff J, et al. Preferred Reporting Items for Systematic Reviews  
32 and Meta-Analyses: The PRISMA Statement. *PLOS Medicine* 2009;6(7):e1000097.  
33 doi: 10.1371/journal.pmed.1000097  
34  
35
- 36 18. McHugh ML. Interrater reliability: the kappa statistic. *Biochem Med (Zagreb)*  
37 2012;22(3):276-82.  
38  
39
- 40 19. Higgins JP, Altman DG, Gotzsche PC, et al. The Cochrane Collaboration's tool for  
41 assessing risk of bias in randomised trials. *BMJ* 2011;343:d5928. doi:  
42 10.1136/bmj.d5928  
43  
44
- 45 20. CADTH. CADTH Environmental Scan Process. Ottawa, 2015.  
46  
47
- 48 21. Jones MM, Hall A, Brooker D, et al. The Future of Public Health: A Horizon Scan. *Rand*  
49 *Health Q* 2014;4(3):18.  
50  
51  
52  
53  
54  
55  
56  
57  
58  
59  
60

- 1  
2  
3 22. Varela-Lema L, De La Fuente-Cid R, Lopez-Garcia M. Developing a prioritized list of  
4 innovative technologies: the Spanish experience. *Int J Technol Assess Health Care*  
5 2014;30(6):626-33. doi: 10.1017/S0266462314000774 [published Online First:  
6 03/30]  
7  
8  
9  
10  
11 23. EPO. The European Patent Office 2018 [Available from: <https://www.epo.org/index.html>  
12 accessed 06/08/2018].  
13  
14  
15 24. Pharamscan U. Working together to improve NHS planning for new medicines: UK  
16 PhramaScan; 2018 [Available from: <https://www.ukpharmascan.org.uk/static/about>.  
17  
18  
19 25. Smith J, Ward D, Michaelides M, et al. New and emerging technologies for the treatment  
20 of inherited retinal diseases: a horizon scanning review. *Eye (Lond)*  
21 2015;29(9):1131-40. doi: 10.1038/eye.2015.115  
22  
23  
24  
25 26. Duchesne GM, Grand M, Kron T, et al. Trans Tasman Radiation Oncology Group:  
26 Development of the Assessment of New Radiation Oncology Technology and  
27 Treatments (ANROTAT) Framework. *J Med Imaging Radiat Oncol* 2015;59(3):363-  
28 70. doi: 10.1111/1754-9485.12255  
29  
30  
31  
32  
33 27. Noorlander CW, Kooi MW, Oomen AG, et al. Horizon scan of nanomedicinal products.  
34 *Nanomedicine (Lond)* 2015;10(10):1599-608. doi: 10.2217/nnm.15.21  
35  
36  
37 28. Clyne M, Schully SD, Dotson WD, et al. Horizon scanning for translational genomic  
38 research beyond bench to bedside. *Genet Med* 2014;16(7):535-8. doi:  
39 10.1038/gim.2013.184  
40  
41  
42  
43 29. Saunders PJ, Middleton JD, Rudge G. Environmental Public Health Tracking: a cost-  
44 effective system for characterizing the sources, distribution and public health impacts  
45 of environmental hazards. *J Public Health (Oxf)* 2017;39(3):506-13. doi:  
46 10.1093/pubmed/fdw130  
47  
48  
49  
50  
51 30. Varela-Lema L, Punal-Rioboo J, Accion BC, et al. Making processes reliable: a validated  
52 pubmed search strategy for identifying new or emerging technologies. *Int J Technol*  
53 *Assess Health Care* 2012;28(4):452-9. doi: 10.1017/S0266462312000578  
54  
55  
56  
57  
58  
59  
60

- 1  
2  
3 31. Sutherland WJ, Broad S, Caine J, et al. A Horizon Scan of Global Conservation Issues for  
4  
5 2016. *Trends Ecol Evol* 2016;31(1):44-53. doi: 10.1016/j.tree.2015.11.007  
6  
7 32. Garnett K, Lickorish FA, Rocks SA, et al. Integrating horizon scanning and strategic risk  
8  
9 prioritisation using a weight of evidence framework to inform policy decisions. *The*  
10  
11 *Science of the total environment* 2016;560-561:82-91. doi:  
12  
13 10.1016/j.scitotenv.2016.04.040 [published Online First: 2016/04/20]  
14  
15 33. Sutherland WJ, Freckleton RP. Making predictive ecology more relevant to policy makers  
16  
17 and practitioners. *Philos Trans R Soc Lond B Biol Sci* 2012;367(1586):322-30. doi:  
18  
19 10.1098/rstb.2011.0181  
20  
21 34. Veenstra DL, Piper M, Haddow JE, et al. Improving the efficiency and relevance of  
22  
23 evidence-based recommendations in the era of whole-genome sequencing: an EGAPP  
24  
25 methods update. *Genet Med* 2013;15(1):14-24. doi: 10.1038/gim.2012.106  
26  
27 35. Masum H, Ranck J, Singer PA. Five promising methods for health foresight. *Foresight*  
28  
29 2010;12(1):54-66.  
30  
31 36. Dawson MN, Algar AC, Antonelli A, et al. An horizon scan of biogeography. *Front*  
32  
33 *Biogeogr* 2013;5(2)  
34  
35 37. Birko S, Dove ES, Ozdemir V. Evaluation of Nine Consensus Indices in Delphi Foresight  
36  
37 Research and Their Dependency on Delphi Survey Characteristics: A Simulation  
38  
39 Study and Debate on Delphi Design and Interpretation. *PLoS One*  
40  
41 2015;10(8):e0135162. doi: 10.1371/journal.pone.0135162  
42  
43 38. Birko S, Dove ES, Ozdemir V. A Delphi Technology Foresight Study: Mapping Social  
44  
45 Construction of Scientific Evidence on Metagenomics Tests for Water Safety. *PLoS*  
46  
47 *One* 2015;10(6):e0129706. doi: 10.1371/journal.pone.0129706  
48  
49 39. Kark S, Sutherland WJ, Shanas U, et al. Priority Questions and Horizon Scanning for  
50  
51 Conservation: A Comparative Study. *PLoS One* 2016;11(1):e0145978. doi:  
52  
53 10.1371/journal.pone.0145978  
54  
55  
56  
57  
58  
59  
60



- 1  
2  
3 40. Simpson S, Cook A, Miles K. Patient and Public Involvement in Early Awareness and  
4 Alert Activities: An Example from the United Kingdom. *Int J Technol Assess Health*  
5 *Care* 2018;34(1):10-17. doi: 10.1017/S0266462317004421  
6  
7
- 8  
9 41. Reimers-Hild C. Strategic foresight, leadership, and the future of rural healthcare  
10 staffing in the United States. *JAAPA* 2018;31(5):44-49. doi:  
11 10.1097/01.JAA.0000532119.06003.12  
12  
13
- 14  
15 42. Gwinn M, Grossniklaus DA, Yu W, et al. Horizon scanning for new genomic tests. *Genet*  
16 *Med* 2011;13(2):161-5. doi: 10.1097/GIM.0b013e3182011661  
17  
18
- 19 43. Ciani O, Jommi C. The role of health technology assessment bodies in shaping drug  
20 development. *Drug Des Devel Ther* 2014;8:2273-81. doi: 10.2147/DDDT.S49935  
21  
22
- 23 44. Nachtnebel A, Breuer J, Willenbacher W, et al. Looking Back on 5 Years of Horizon  
24 Scanning in Oncology. *Int J Technol Assess Health Care* 2016;32(1-2):54-60. doi:  
25 10.1017/S0266462316000052  
26  
27
- 28  
29 45. Stafinski T, Topfer LA, Zakariasen K, et al. The role of surgeons in identifying emerging  
30 technologies for health technology assessment. *Can J Surg* 2010;53(2):86-92.  
31  
32
- 33 46. Eriksson I, Wettermark B, Persson M, et al. The Early Awareness and Alert System in  
34 Sweden: History and Current Status. *Front Pharmacol* 2017;8(674):674. doi:  
35 10.3389/fphar.2017.00674  
36  
37
- 38  
39 47. RANZCR. Position Paper - Techniques and Technologies in Radiation Oncology 2015  
40 Sydney: The Royal Australian and New Zealand College of Radiologists, 2015.  
41  
42
- 43 48. Nachtnebel A, Geiger-Gritsch S, Hintringer K, et al. Scanning the horizon: development  
44 and implementation of an early awareness system for anticancer drugs in Austria.  
45 *Health Policy* 2012;104(1):1-11. doi: 10.1016/j.healthpol.2011.11.003  
46  
47
- 48  
49 49. Raman G, Wallace B, Patel K, et al. Update on horizon scans of genetic tests currently  
50 available for clinical use in cancers. In: *Quality AfHRa*, ed. Rockville (MD), 2011.  
51  
52
- 53 50. Wild C, Simpson S, Douw K, et al. Information service on new and emerging health  
54 technologies: identification and prioritization processes for a European union-wide  
55  
56  
57  
58  
59

- 1  
2  
3 newsletter. *Int J Technol Assess Health Care* 2009;25 Suppl 2(S2):48-55. doi:  
4 10.1017/S0266462309990687 [published Online First: 12/23]  
5  
6  
7 51. Maddern G, Boulton M, Ahern E, et al. ASERNIP-S: international trend setting. *ANZ J Surg*  
8 2008;78(10):853-8. doi: 10.1111/j.1445-2197.2008.04679.x  
9  
10  
11 52. Chapman AM, Taylor CA, Girling AJ. PRM22 The Headroom Method of Early Economic  
12 Evaluation of Medical Devices: A Useful Tool for Device Developers? *Value in Health*  
13 2012;15(7):463-64. doi: 10.1016/j.jval.2012.08.1486  
14  
15  
16  
17 53. Rudd MA, Moore AFP, Rochberg D, et al. Climate research priorities for policy-makers,  
18 practitioners, and scientists in Georgia, USA. *Environ Manage* 2018;62(2):190-209.  
19 doi: 10.1007/s00267-018-1051-4  
20  
21  
22  
23 54. Joppi R, Dematte L, Menti AM, et al. The Italian Horizon Scanning Project. *Eur J Clin*  
24 *Pharmacol* 2009;65(8):775-81. doi: 10.1007/s00228-009-0666-z  
25  
26  
27  
28 55. Khoury MJ, Gwinn M, Dotson WD, et al. Knowledge integration at the center of genomic  
29 medicine. *Genetics in Medicine* 2012;14(7):643.  
30  
31  
32 56. Wild C, Langer T. Emerging health technologies: informing and supporting health policy  
33 early. *Health Policy* 2008;87(2):160-71. doi: 10.1016/j.healthpol.2008.01.002  
34  
35  
36 57. Gomes PT, Teixeira Vidal A, Souza A. Radar – An Important Tool for Horizon Scanning  
37 Dissemination in Brazil. *Value in Health* 2017;20(9):906.  
38  
39  
40 58. Doos L, Packer C, Ward D, et al. Past speculations of the future: a review of the  
41 methods used for forecasting emerging health technologies. *BMJ Open*  
42 2016;6(3):e010479. doi: 10.1136/bmjopen-2015-010479  
43  
44  
45  
46 59. Sun F, Bruening W, Uhl S, et al. Quality, regulation and clinical utility of laboratory-  
47 developed molecular tests. Rockville (MD), 2010.  
48  
49  
50 60. Observatory I. Who We Are And What We Do Newcastle upon Tyne, United Kingdom:  
51 National Institute for Health Research (NIHR); 2018 [Available from:  
52 <http://www.io.nihr.ac.uk/what-we-do/>.  
53  
54  
55  
56  
57  
58  
59  
60

- 1  
2  
3 61. Gale P, Breed AC. Horizon scanning for emergence of new viruses: from constructing  
4 complex scenarios to online games. *Transboundary and Emerging Diseases*  
5 2012;60(5):472-74.  
6  
7  
8  
9 62. Wild C, Langer T. Emerging health technologies: informing and supporting health policy  
10 early. *Health Policy* 2008;87(2):160-71.  
11  
12  
13 63. Sutherland WJ, Butchart SH, Connor B, et al. A 2018 horizon scan of emerging issues  
14 for global conservation and biological diversity. *Trends in Ecology & Evolution*  
15 2018;33(1):47-58.  
16  
17  
18  
19 64. Mundy L, Hiller J, Merlin T. The true role of horizon scanning in Australia: who it informs  
20 and why. . *international Journal of Technolgy Assessment in Health Care*  
21 2011;27(1):95-96.  
22  
23  
24  
25 65. Sun F, Bruening W, Uhl S, et al. *Quality, Regulation and Clinical Utility of Laboratory-*  
26 *developed Molecular Tests*. Rockville (MD)2010.  
27  
28  
29 66. ICMRA. ICMRA strategic strategic priority on innovation. 2017 [Available from:  
30 [http://www.icmra.info/drupal/sites/default/files/2017-](http://www.icmra.info/drupal/sites/default/files/2017-12/ICMRA%20Innovation%20Concept%20Note_0.pdf)  
31 [12/ICMRA%20Innovation%20Concept%20Note\\_0.pdf](http://www.icmra.info/drupal/sites/default/files/2017-12/ICMRA%20Innovation%20Concept%20Note_0.pdf).  
32  
33  
34  
35 67. HMA, EMA. *Mandate of the European Innovation Network*, 2016.  
36  
37 68. Lepage-Nefkens I DK, Mantjes G, de Graaf G, Leroy R, Cleemput I. *Horizon scanning for*  
38 *pharmaceuticals: Proposal for the BeNeLuxA collaboration*. Brussels: Health Services  
39 Research (HSR) Brussels: Belgian Health Care Knowledge Centre (KCE), 2017.  
40  
41  
42  
43 69. Wettermark B, Persson ME, Wilking N, et al. Forecasting drug utilization and expenditure  
44 in a metropolitan health region. *BMC Health Services Research* 2010;10(1)  
45  
46  
47  
48  
49  
50

## 51 **Fig 2. Literature selection process flowchart** <sup>17</sup>

52  
53  
54 Flow diagram depicting the different stages of the systematic literature review according to  
55 the PRISMA format.  
56

1  
2  
3  
4  
5  
6  
7  
8  
9  
10  
11  
12  
13  
14  
15  
16  
17  
18  
19  
20  
21  
22  
23  
24  
25  
26  
27  
28  
29  
30  
31  
32  
33  
34  
35  
36  
37  
38  
39  
40  
41  
42  
43  
44  
45  
46  
47  
48  
49  
50  
51  
52  
53  
54  
55  
56  
57  
58  
59  
60

For peer review only

1  
2  
3  
4  
5  
6  
7  
8  
9  
10  
11  
12  
13  
14  
15  
16  
17  
18  
19  
20  
21  
22  
23  
24  
25  
26  
27  
28  
29  
30  
31  
32  
33  
34  
35  
36  
37  
38  
39  
40  
41  
42  
43  
44  
45  
46  
47  
48  
49  
50  
51  
52  
53  
54  
55  
56  
57  
58  
59  
60

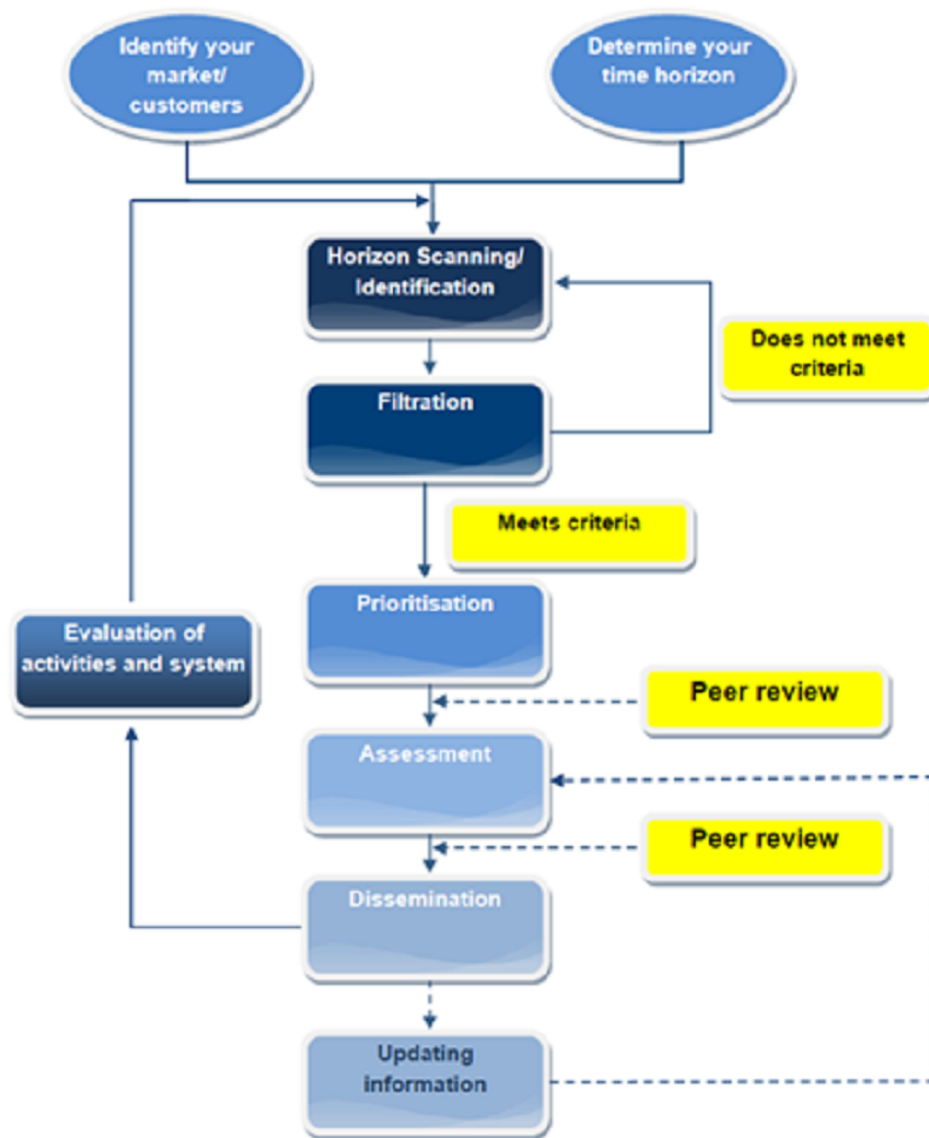

Fig 1. Common stages of Horizon scanning from the EuroScan network (12). This figure is licensed under the Creative Commons Attribution-NonCommercial-ShareAlike4.0 International License (CC BY-NC-SA 4.0)

97x113mm (300 x 300 DPI)



Caption : Fig 2. Literature selection process flowchart (16)

150x102mm (300 x 300 DPI)

## Search strategy

Medline and Embase bibliographic databases were searched to identify research papers on the use of horizon scanning, and the methods used for this purpose. The date range was between 2018-01-01 and 2018-07-04. The final search took place on 2018-07-04. Grey literature and bibliographies of the most relevant research papers supplemented this search.

The primary search terms used were: "horizon scan\*" OR "strategic foresight\*" OR "systematic early dialogue\*" OR "early warning and alert system\*". All literature, of which the title or abstract contained any of the keywords above, was flagged.

In the database searches, a single set of entry terms were applied:

```
('horizon scan*':ab,ti OR 'strategic foresight*':ab,ti OR 'systematic early dialogue*':ab,ti OR (('early awareness' NEXT/2 'alert system*'):ab,ti))
```

In Fields:

```
horizon scan* in Abstract  
horizon scan* in Title  
strategic foresight* in Abstract  
strategic foresight* in Title  
systematic early dialogue* in Abstract  
systematic early dialogue* in Title  
'early awareness' NEXT/2 'alert system*' in Abstract  
'early awareness' NEXT/2 'alert system*' in Title
```

## Quality appraisal

The appraisal was conducted at the screening stage as part of the inclusion/exclusion criteria. The questions regarding internal and external validity are indicated in Table 1.

To ensure that the quality appraisal and screening were being applied harmoniously, a third researcher appraised and screened the excluded literature according to the same criteria to ensure that all relevant papers were captured (resulting in one further publication being selected).

Table 1. Quality appraisal items and inclusion/exclusion criteria for screening

|                                                              | <b>Internal validity</b>                                                                                                                   | <b>External validity</b>                                                                                                                                                                                               |
|--------------------------------------------------------------|--------------------------------------------------------------------------------------------------------------------------------------------|------------------------------------------------------------------------------------------------------------------------------------------------------------------------------------------------------------------------|
| <b>First round of appraisal and screening (108 excluded)</b> | (a) either a methodology for horizon scanning or strategic foresight, <i>or</i> a discussion, or experience provided, of horizon scanning. | (b) It was also essential for the abstracts to indicate a breadth of horizon scanning of the relevant field level <i>or</i> address a methodological aspect which may be generally applicable across different fields. |
| <b>Second round of appraisal and screening (58 excluded)</b> | (a) the horizon scan or foresight methodology was detailed, <i>and</i>                                                                     | (b) the priority areas included relevant science and/or technology, <i>and</i>                                                                                                                                         |
|                                                              |                                                                                                                                            | (c) a collaborative/international approach was used, <i>and</i>                                                                                                                                                        |
|                                                              |                                                                                                                                            | (d) the horizon scanning undertaken spanned a period of between 2 and 15 years.                                                                                                                                        |
|                                                              |                                                                                                                                            | <i>Alternatively</i> , the paper was required to demonstrate methodological aspect(s) of foresight or horizon scanning of potentially general applicability.                                                           |

Risk of bias was assessed in accordance with the BMJ guidelines and the Cochrane risk of bias tool. While bias was not typically found in these non-clinical qualitative studies, there were three exceptions:



- 1  
2  
3  
4  
5  
6 - A form of publication bias was likely in which only horizon scanning undertaken in  
7  
8 organisations with a strong background in publishing academic publications and  
9  
10 transparency were discovered. It was not possible to correct for this.  
11  
12  
13 - Omission bias may have occurred as the papers reported systematic methodological  
14  
15 aspects of horizon scanning; some horizon scanning, however, may occur in an ad-hoc  
16  
17 manner, e.g., a signal discovered by word-of-mouth.  
18  
19  
20 - The competing interests of the authors were not considered beyond the standards of  
21  
22 the source journals. This was because it was not thought highly relevant to the reporting  
23  
24 of methodologies.  
25  
26  
27  
28  
29  
30  
31  
32  
33  
34  
35  
36  
37  
38  
39  
40  
41  
42  
43  
44  
45  
46  
47  
48  
49  
50  
51  
52  
53  
54  
55  
56  
57  
58  
59  
60

1  
2  
3  
4  
5  
6  
7  
8  
9  
10  
11  
12  
13  
14  
15  
16  
17  
18  
19  
20  
21  
22  
23  
24  
25  
26  
27  
28  
29  
30  
31  
32  
33  
34  
35  
36  
37  
38  
39  
40  
41  
42  
43  
44  
45  
46  
47  
48  
49  
50  
51  
52  
53  
54  
55  
56  
57  
58  
59  
60

| Included papers and info                                                                                                                                                         |                                                                    | Information sources (proactive and passive) |                          |                         |                    |                     |          |                                    |                                           |      |            |            |            |                               |                     | Time horizon  | Filteration             |                       | Prioritisation |            | Assessment |            |            |            |             | Dissemination |            |            | Updating   | Private Evaluation |            |            |            |            |  |
|----------------------------------------------------------------------------------------------------------------------------------------------------------------------------------|--------------------------------------------------------------------|---------------------------------------------|--------------------------|-------------------------|--------------------|---------------------|----------|------------------------------------|-------------------------------------------|------|------------|------------|------------|-------------------------------|---------------------|---------------|-------------------------|-----------------------|----------------|------------|------------|------------|------------|------------|-------------|---------------|------------|------------|------------|--------------------|------------|------------|------------|------------|--|
| Title                                                                                                                                                                            | Full Text Link ("-" if unavailable or estimation of non-inclusion) | Abstract                                    | Scientific literature    | Pipeline                | Patents            | Other observatories | Media    | International institutions and For | Individuals, Committees and expert groups |      |            |            | EU bodies  | Draft Regulatory Publications | Innovative business | Organisations | Meeting and conferences | Other grey literature | Criteria       | Criteria   | Method     | Factors    | Depth      | Method     | Peer review | ICT           | Structure  | Format     | Frequency  | Audience           | Strategy   | Frequency  | Method     |            |  |
|                                                                                                                                                                                  |                                                                    |                                             | Clinical trial registers | Research infrastructure | Commercial sources | Commercial          | Academic | Survey techniques                  | Academy of Sciences                       | UKRI | Task Force | Task Force | Task Force | Task Force                    | Task Force          | Task Force    | Task Force              | Task Force            | Task Force     | Task Force | Task Force | Task Force | Task Force | Task Force | Task Force  | Task Force    | Task Force | Task Force | Task Force | Task Force         | Task Force | Task Force | Task Force | Task Force |  |
| Australia and New Zealand Horizon Scanning Network, Australia and New Zealand (ANZHSN), including Adelaide Health Technology Assessment (AHTA)                                   |                                                                    |                                             |                          |                         |                    |                     |          |                                    |                                           |      |            |            |            |                               |                     |               |                         |                       |                |            |            |            |            |            |             |               |            |            |            |                    |            |            |            |            |  |
| Basque Office for Health Technology Assessment, Basque Country (OSTEBA)                                                                                                          |                                                                    |                                             |                          |                         |                    |                     |          |                                    |                                           |      |            |            |            |                               |                     |               |                         |                       |                |            |            |            |            |            |             |               |            |            |            |                    |            |            |            |            |  |
| Canadian Agency for Drugs and Technologies in Health, Canada (CADTH)                                                                                                             |                                                                    |                                             |                          |                         |                    |                     |          |                                    |                                           |      |            |            |            |                               |                     |               |                         |                       |                |            |            |            |            |            |             |               |            |            |            |                    |            |            |            |            |  |
| Supporting Innovation through Regulation and Science: Initiated as an Innovation Hub for Health Products                                                                         |                                                                    |                                             |                          |                         |                    |                     |          |                                    |                                           |      |            |            |            |                               |                     |               |                         |                       |                |            |            |            |            |            |             |               |            |            |            |                    |            |            |            |            |  |
| Italian Horizon Scanning Project, Servizio Farmaceutico Fombionale, Italy (HSPP)                                                                                                 |                                                                    |                                             |                          |                         |                    |                     |          |                                    |                                           |      |            |            |            |                               |                     |               |                         |                       |                |            |            |            |            |            |             |               |            |            |            |                    |            |            |            |            |  |
| National Horizon Scanning Centre, England (NHSC) + (Their research paper: 'The future of the future: a review of the methods used for forecasting emerging health technologies') |                                                                    |                                             |                          |                         |                    |                     |          |                                    |                                           |      |            |            |            |                               |                     |               |                         |                       |                |            |            |            |            |            |             |               |            |            |            |                    |            |            |            |            |  |
| Swedish Council on Technology Assessment in Health Care, Sweden (SBU)                                                                                                            |                                                                    |                                             |                          |                         |                    |                     |          |                                    |                                           |      |            |            |            |                               |                     |               |                         |                       |                |            |            |            |            |            |             |               |            |            |            |                    |            |            |            |            |  |
| UK PharmScan                                                                                                                                                                     |                                                                    |                                             |                          |                         |                    |                     |          |                                    |                                           |      |            |            |            |                               |                     |               |                         |                       |                |            |            |            |            |            |             |               |            |            |            |                    |            |            |            |            |  |
| Oxford Centre for Monitoring and Diagnosis in Primary Care                                                                                                                       |                                                                    |                                             |                          |                         |                    |                     |          |                                    |                                           |      |            |            |            |                               |                     |               |                         |                       |                |            |            |            |            |            |             |               |            |            |            |                    |            |            |            |            |  |
| Masum H, Banck J, Singer PA, Five promising methods for health foresight. <i>Foresight</i> 2010; 12: 54-66. doi:10.1080/144324810110201820785                                    |                                                                    |                                             |                          |                         |                    |                     |          |                                    |                                           |      |            |            |            |                               |                     |               |                         |                       |                |            |            |            |            |            |             |               |            |            |            |                    |            |            |            |            |  |
| Evaluation of nine Japanese indices in depth research on depth survey characteristics: a simulation study and design on depth design and implementation                          |                                                                    |                                             |                          |                         |                    |                     |          |                                    |                                           |      |            |            |            |                               |                     |               |                         |                       |                |            |            |            |            |            |             |               |            |            |            |                    |            |            |            |            |  |
| A Delphi technology foresight study: Mapping social construction of scientific evidence on metagenomics tests for water safety                                                   |                                                                    |                                             |                          |                         |                    |                     |          |                                    |                                           |      |            |            |            |                               |                     |               |                         |                       |                |            |            |            |            |            |             |               |            |            |            |                    |            |            |            |            |  |
| Using strategic foresight to assess conservation opportunity                                                                                                                     |                                                                    |                                             |                          |                         |                    |                     |          |                                    |                                           |      |            |            |            |                               |                     |               |                         |                       |                |            |            |            |            |            |             |               |            |            |            |                    |            |            |            |            |  |
| Strategic foresight: how planning for the unpredictable can improve environmental decision-making                                                                                |                                                                    |                                             |                          |                         |                    |                     |          |                                    |                                           |      |            |            |            |                               |                     |               |                         |                       |                |            |            |            |            |            |             |               |            |            |            |                    |            |            |            |            |  |
| Horizon scan of nanomedical products                                                                                                                                             |                                                                    |                                             |                          |                         |                    |                     |          |                                    |                                           |      |            |            |            |                               |                     |               |                         |                       |                |            |            |            |            |            |             |               |            |            |            |                    |            |            |            |            |  |
| Frank Tasson Radiation Oncology Group: Development of the Assessment of New Radiation Oncology Technology and Treatment (ANOROT) Framework                                       |                                                                    |                                             |                          |                         |                    |                     |          |                                    |                                           |      |            |            |            |                               |                     |               |                         |                       |                |            |            |            |            |            |             |               |            |            |            |                    |            |            |            |            |  |
| Horizon scanning for translational genomic research beyond bench to bedside                                                                                                      |                                                                    |                                             |                          |                         |                    |                     |          |                                    |                                           |      |            |            |            |                               |                     |               |                         |                       |                |            |            |            |            |            |             |               |            |            |            |                    |            |            |            |            |  |

1  
2  
3  
4  
5  
6  
7  
8  
9  
10  
11  
12  
13  
14  
15  
16  
17  
18  
19  
20  
21  
22  
23  
24  
25  
26  
27  
28  
29  
30  
31  
32  
33  
34  
35  
36  
37  
38  
39  
40  
41  
42  
43  
44  
45  
46  
47  
48  
49  
50  
51  
52  
53  
54  
55  
56  
57  
58  
59  
60

| Included papers and info                                                                                                                            |                                                                   | Information sources (proactive and passive) |                          |                      |                    |                     |          |                                     |                                           |           |                               |                     |               |                          |                       | Time horizon | Filteration |           | Prioritisation |           | Assessment |             |        |           | Dissemination |           |          | Updating | Review |
|-----------------------------------------------------------------------------------------------------------------------------------------------------|-------------------------------------------------------------------|---------------------------------------------|--------------------------|----------------------|--------------------|---------------------|----------|-------------------------------------|-------------------------------------------|-----------|-------------------------------|---------------------|---------------|--------------------------|-----------------------|--------------|-------------|-----------|----------------|-----------|------------|-------------|--------|-----------|---------------|-----------|----------|----------|--------|
| Title                                                                                                                                               | Full Text Link ("-" if unavailable or extension of non-inclusion) | Abstract                                    | Scientific literature    | Pipeline             | Patents            | Other observatories | Media    | International institutions and fora | Individuals, Committees and expert groups | EU bodies | Draft Regulatory Publications | Innovative business | Organisations | Meetings and conferences | Other grey literature | Criteria     | Criteria    | Method    | Factors        | Depth     | Method     | Peer review | ICT    | Structure | Format        | Frequency | Audience | Strategy | Review |
|                                                                                                                                                     |                                                                   |                                             | Clinical trial registers | Research information | Commercial sources | Commercial          | Academic | Survey techniques                   | Academy of Sciences                       | UKRI      | Task Force                    | Industry            | Value Capture | Criteria                 | Method                | Peer review  | ICT         | Structure | Format         | Frequency | Audience   | Strategy    | Review |           |               |           |          |          |        |
| ATSDNIP-5 International trend setting                                                                                                               |                                                                   |                                             |                          |                      |                    |                     |          |                                     |                                           |           |                               |                     |               |                          |                       |              |             |           |                |           |            |             |        |           |               |           |          |          |        |
| Update on Horizon Scans of Genetic Tests Currently Available for Clinical Use in Cancer (Internet)                                                  |                                                                   |                                             |                          |                      |                    |                     |          |                                     |                                           |           |                               |                     |               |                          |                       |              |             |           |                |           |            |             |        |           |               |           |          |          |        |
| Horizon scanning for invasive alien species with the potential to threaten biodiversity in Great Britain.                                           |                                                                   |                                             |                          |                      |                    |                     |          |                                     |                                           |           |                               |                     |               |                          |                       |              |             |           |                |           |            |             |        |           |               |           |          |          |        |
| Making processes viable a validated PubMed search strategy for identifying new or emerging technologies.                                            |                                                                   |                                             |                          |                      |                    |                     |          |                                     |                                           |           |                               |                     |               |                          |                       |              |             |           |                |           |            |             |        |           |               |           |          |          |        |
| Improving the efficiency and relevance of evidence-based recommendations in the era of whole-genome sequencing: an EDAPP methods update.            |                                                                   |                                             |                          |                      |                    |                     |          |                                     |                                           |           |                               |                     |               |                          |                       |              |             |           |                |           |            |             |        |           |               |           |          |          |        |
| Knowledge integration at the center of genomic medicine.                                                                                            |                                                                   |                                             |                          |                      |                    |                     |          |                                     |                                           |           |                               |                     |               |                          |                       |              |             |           |                |           |            |             |        |           |               |           |          |          |        |
| Horizon scanning for new genomic tests.                                                                                                             |                                                                   |                                             |                          |                      |                    |                     |          |                                     |                                           |           |                               |                     |               |                          |                       |              |             |           |                |           |            |             |        |           |               |           |          |          |        |
| Evaluating new surgical techniques in Australia: the Australian Safety and Efficacy Register of New Interventional Procedures: Surgical experience. |                                                                   |                                             |                          |                      |                    |                     |          |                                     |                                           |           |                               |                     |               |                          |                       |              |             |           |                |           |            |             |        |           |               |           |          |          |        |
| The Australian Safety and Efficacy Register of New Interventional Procedures - Surgical (ASERIP-S) assesses new surgeries.                          |                                                                   |                                             |                          |                      |                    |                     |          |                                     |                                           |           |                               |                     |               |                          |                       |              |             |           |                |           |            |             |        |           |               |           |          |          |        |
| Report from the World Health Organization's third Product Development for Vaccines Advisory Committee (PDVAC) meeting, Geneva, 8-10th June 2016     |                                                                   |                                             |                          |                      |                    |                     |          |                                     |                                           |           |                               |                     |               |                          |                       |              |             |           |                |           |            |             |        |           |               |           |          |          |        |
| A knowledge base for tracking the impact of genomics on population health                                                                           |                                                                   |                                             |                          |                      |                    |                     |          |                                     |                                           |           |                               |                     |               |                          |                       |              |             |           |                |           |            |             |        |           |               |           |          |          |        |
| Challenges and priorities for modelling livestock health and pathogens in the context of climate change                                             |                                                                   |                                             |                          |                      |                    |                     |          |                                     |                                           |           |                               |                     |               |                          |                       |              |             |           |                |           |            |             |        |           |               |           |          |          |        |
| Priority questions and horizon scanning for conservation: A comparative study                                                                       |                                                                   |                                             |                          |                      |                    |                     |          |                                     |                                           |           |                               |                     |               |                          |                       |              |             |           |                |           |            |             |        |           |               |           |          |          |        |
| Techniques and technologies in radiation oncology: The MRCAT faculty of radiation oncology horizon scan                                             |                                                                   |                                             |                          |                      |                    |                     |          |                                     |                                           |           |                               |                     |               |                          |                       |              |             |           |                |           |            |             |        |           |               |           |          |          |        |
| A Horizon Scan of Global Conservation Issues for 2016                                                                                               |                                                                   |                                             |                          |                      |                    |                     |          |                                     |                                           |           |                               |                     |               |                          |                       |              |             |           |                |           |            |             |        |           |               |           |          |          |        |
| A horizon scan of future threats and opportunities for pollinators and pollination                                                                  |                                                                   |                                             |                          |                      |                    |                     |          |                                     |                                           |           |                               |                     |               |                          |                       |              |             |           |                |           |            |             |        |           |               |           |          |          |        |
| Looking back on 5 years of horizon scanning in oncology                                                                                             |                                                                   |                                             |                          |                      |                    |                     |          |                                     |                                           |           |                               |                     |               |                          |                       |              |             |           |                |           |            |             |        |           |               |           |          |          |        |

For peer review only

1  
2  
3  
4  
5  
6  
7  
8  
9  
10  
11  
12  
13  
14  
15  
16  
17  
18  
19  
20  
21  
22  
23  
24  
25  
26  
27  
28  
29  
30  
31  
32  
33  
34  
35  
36  
37  
38  
39  
40  
41  
42  
43  
44  
45  
46  
47  
48  
49  
50  
51  
52  
53  
54  
55  
56  
57  
58  
59  
60

| Included papers and info                                                                                                       |                                                                   | Information sources (proactive and passive) |                          |                      |                    |                     |         |                                     |                                           |               |                    |                     |               |                          |                       | Time horizon | Filteration |        | Prioritisation |       | Assessment |             |       |           |        | Dissemination |          |          | Updating | Review |
|--------------------------------------------------------------------------------------------------------------------------------|-------------------------------------------------------------------|---------------------------------------------|--------------------------|----------------------|--------------------|---------------------|---------|-------------------------------------|-------------------------------------------|---------------|--------------------|---------------------|---------------|--------------------------|-----------------------|--------------|-------------|--------|----------------|-------|------------|-------------|-------|-----------|--------|---------------|----------|----------|----------|--------|
| Title                                                                                                                          | Full Text Link ("-" if unavailable or exclusion of non-inclusion) | Abstract                                    | Scientific literature    | Pipeline             | Patents            | Other observatories | Media   | International institutions and fora | Individuals, Committees and expert groups | EU bodies     | Draft publications | Innovative business | Organisations | Meetings and conferences | Other grey literature | Criteria     | Criteria    | Method | Factors        | Depth | Method     | Peer review | ICT   | Structure | Format | Frequency     | Audience | Strategy | Updating | Review |
|                                                                                                                                |                                                                   |                                             | Clinical trial registers | Research information | Commercial sources | Commercial          | Medical | Survey techniques                   | Academy of sciences                       | Life sciences | Trade              | Trade               | Trade         | Trade                    | Trade                 | Trade        | Trade       | Trade  | Trade          | Trade | Trade      | Trade       | Trade | Trade     | Trade  | Trade         | Trade    | Trade    | Trade    | Trade  |
| CHANGING HEALTH TECHNOLOGY ASSESSMENT PARADIGMS?                                                                               |                                                                   |                                             |                          |                      |                    |                     |         |                                     |                                           |               |                    |                     |               |                          |                       |              |             |        |                |       |            |             |       |           |        |               |          |          |          |        |
| New and emerging technologies for the treatment of inherited retinal disease: A horizon scanning review                        |                                                                   |                                             |                          |                      |                    |                     |         |                                     |                                           |               |                    |                     |               |                          |                       |              |             |        |                |       |            |             |       |           |        |               |          |          |          |        |
| Results from a horizon scan on risks associated with transplantation of human organs, tissues and cells: from donor to patient |                                                                   |                                             |                          |                      |                    |                     |         |                                     |                                           |               |                    |                     |               |                          |                       |              |             |        |                |       |            |             |       |           |        |               |          |          |          |        |
| Preparedness for emerging infectious diseases: Pathways from anticipation to action                                            |                                                                   |                                             |                          |                      |                    |                     |         |                                     |                                           |               |                    |                     |               |                          |                       |              |             |        |                |       |            |             |       |           |        |               |          |          |          |        |
| Identifying and selecting new procedures for health technology assessment: A decade of nice experience in the United Kingdom   |                                                                   |                                             |                          |                      |                    |                     |         |                                     |                                           |               |                    |                     |               |                          |                       |              |             |        |                |       |            |             |       |           |        |               |          |          |          |        |
| The role of health technology assessment bodies in shaping drug development                                                    |                                                                   |                                             |                          |                      |                    |                     |         |                                     |                                           |               |                    |                     |               |                          |                       |              |             |        |                |       |            |             |       |           |        |               |          |          |          |        |
| A horizon scan for species conservation by poole and squarisms                                                                 |                                                                   |                                             |                          |                      |                    |                     |         |                                     |                                           |               |                    |                     |               |                          |                       |              |             |        |                |       |            |             |       |           |        |               |          |          |          |        |
| Strategic foresight: how planning for the unpredictable can improve environmental decision-making                              |                                                                   |                                             |                          |                      |                    |                     |         |                                     |                                           |               |                    |                     |               |                          |                       |              |             |        |                |       |            |             |       |           |        |               |          |          |          |        |
| Evolutionary rescue in a changing world                                                                                        |                                                                   |                                             |                          |                      |                    |                     |         |                                     |                                           |               |                    |                     |               |                          |                       |              |             |        |                |       |            |             |       |           |        |               |          |          |          |        |
| Identifying the science and technology dimensions of emerging public policy issues through horizon scanning                    |                                                                   |                                             |                          |                      |                    |                     |         |                                     |                                           |               |                    |                     |               |                          |                       |              |             |        |                |       |            |             |       |           |        |               |          |          |          |        |
| Prioritizing genomic applications for action by level of evidence: A horizon scanning method                                   |                                                                   |                                             |                          |                      |                    |                     |         |                                     |                                           |               |                    |                     |               |                          |                       |              |             |        |                |       |            |             |       |           |        |               |          |          |          |        |
| A horizon-scanning method can identify gaps among genomic application guidelines                                               |                                                                   |                                             |                          |                      |                    |                     |         |                                     |                                           |               |                    |                     |               |                          |                       |              |             |        |                |       |            |             |       |           |        |               |          |          |          |        |
| DEVELOPING A PRIORITIZED LIST OF INNOVATIVE TECHNOLOGIES: THE SPANISH EXPERIENCE                                               |                                                                   |                                             |                          |                      |                    |                     |         |                                     |                                           |               |                    |                     |               |                          |                       |              |             |        |                |       |            |             |       |           |        |               |          |          |          |        |
| Eu pharmaceutical expenditure forecast                                                                                         |                                                                   |                                             |                          |                      |                    |                     |         |                                     |                                           |               |                    |                     |               |                          |                       |              |             |        |                |       |            |             |       |           |        |               |          |          |          |        |
| Horizon scanning for emergence of new viruses: From constructing complex scenarios to online games                             |                                                                   |                                             |                          |                      |                    |                     |         |                                     |                                           |               |                    |                     |               |                          |                       |              |             |        |                |       |            |             |       |           |        |               |          |          |          |        |
| The horizon method of early evaluation of medical devices: A useful tool for device developers?                                |                                                                   |                                             |                          |                      |                    |                     |         |                                     |                                           |               |                    |                     |               |                          |                       |              |             |        |                |       |            |             |       |           |        |               |          |          |          |        |
| Horizon scanning in radiation oncology in Australia: Considerations and future trends                                          |                                                                   |                                             |                          |                      |                    |                     |         |                                     |                                           |               |                    |                     |               |                          |                       |              |             |        |                |       |            |             |       |           |        |               |          |          |          |        |

1  
2  
3  
4  
5  
6  
7  
8  
9  
10  
11  
12  
13  
14  
15  
16  
17  
18  
19  
20  
21  
22  
23  
24  
25  
26  
27  
28  
29  
30  
31  
32  
33  
34  
35  
36  
37  
38  
39  
40  
41  
42  
43  
44  
45  
46  
47  
48  
49  
50  
51  
52  
53  
54  
55  
56  
57  
58  
59  
60

| Included papers and info                                                                                                                                           |                                                                   |          | Information sources (proactive and passive) |                      |                    |                     |          |                                    |                                           |           |           |           |           |           |           |           | Time horizon  | Filteration              |                       | Prioritisation |           | Assessment |           |           |           | Dissemination |           |           | Updating  | Review    |           |           |           |
|--------------------------------------------------------------------------------------------------------------------------------------------------------------------|-------------------------------------------------------------------|----------|---------------------------------------------|----------------------|--------------------|---------------------|----------|------------------------------------|-------------------------------------------|-----------|-----------|-----------|-----------|-----------|-----------|-----------|---------------|--------------------------|-----------------------|----------------|-----------|------------|-----------|-----------|-----------|---------------|-----------|-----------|-----------|-----------|-----------|-----------|-----------|
| Title                                                                                                                                                              | Full Text Link ("-" if unavailable or extension of non-inclusion) | Abstract | Scientific literature                       | Pipeline             | Patents            | Other observatories | Media    | International institutions and FPs | Individuals, Committees and expert groups |           |           |           | EU bodies | EU bodies | EU bodies | EU bodies | Organisations | Meetings and conferences | Other grey literature | Criteria       | Criteria  | Method     | Factors   | Depth     | Method    | Peer review   | ICT       | Structure | Format    | Frequency | Audience  | Strategy  | Review    |
|                                                                                                                                                                    |                                                                   |          | Clinical trial registers                    | Research information | Commercial sources | Commercial          | Academic | Survey techniques                  | Academy of Sciences                       | EU bodies     | EU bodies                | EU bodies             | EU bodies      | EU bodies | EU bodies  | EU bodies | EU bodies | EU bodies | EU bodies     | EU bodies | EU bodies | EU bodies | EU bodies | EU bodies | EU bodies | EU bodies |
| The 'Assessment of New Radiation Dosimetry Technology and Treatment' (ANROTAT) project: Update on progress                                                         |                                                                   |          |                                             |                      |                    |                     |          |                                    |                                           |           |           |           |           |           |           |           |               |                          |                       |                |           |            |           |           |           |               |           |           |           |           |           |           |           |
| Using best worst scaling in horizon scanning for hepatocellular carcinoma technologies                                                                             |                                                                   |          |                                             |                      |                    |                     |          |                                    |                                           |           |           |           |           |           |           |           |               |                          |                       |                |           |            |           |           |           |               |           |           |           |           |           |           |           |
| Analyzing 10 years of early awareness and alert activity in the United Kingdom                                                                                     |                                                                   |          |                                             |                      |                    |                     |          |                                    |                                           |           |           |           |           |           |           |           |               |                          |                       |                |           |            |           |           |           |               |           |           |           |           |           |           |           |
| Implementing a national early awareness and alert system for new and emerging health technologies in Italy: The CODE project                                       |                                                                   |          |                                             |                      |                    |                     |          |                                    |                                           |           |           |           |           |           |           |           |               |                          |                       |                |           |            |           |           |           |               |           |           |           |           |           |           |           |
| Innovation and the burden of disease: Retrospective observational study of new and emerging health technologies reported by the European network from 2000 to 2009 |                                                                   |          |                                             |                      |                    |                     |          |                                    |                                           |           |           |           |           |           |           |           |               |                          |                       |                |           |            |           |           |           |               |           |           |           |           |           |           |           |
| Making predictive ecology more relevant to policy makers and practitioners                                                                                         |                                                                   |          |                                             |                      |                    |                     |          |                                    |                                           |           |           |           |           |           |           |           |               |                          |                       |                |           |            |           |           |           |               |           |           |           |           |           |           |           |
| Scanning the horizon: Development and implementation of an early awareness system for anticancer drugs in Austria                                                  |                                                                   |          |                                             |                      |                    |                     |          |                                    |                                           |           |           |           |           |           |           |           |               |                          |                       |                |           |            |           |           |           |               |           |           |           |           |           |           |           |
| Identification of innovation in public health                                                                                                                      |                                                                   |          |                                             |                      |                    |                     |          |                                    |                                           |           |           |           |           |           |           |           |               |                          |                       |                |           |            |           |           |           |               |           |           |           |           |           |           |           |
| The true role of horizon scanning in Australia: Who it informs and why                                                                                             |                                                                   |          |                                             |                      |                    |                     |          |                                    |                                           |           |           |           |           |           |           |           |               |                          |                       |                |           |            |           |           |           |               |           |           |           |           |           |           |           |
| Reply to the letter by Munty, Miller and Martin on the true role of horizon scanning in Australia                                                                  |                                                                   |          |                                             |                      |                    |                     |          |                                    |                                           |           |           |           |           |           |           |           |               |                          |                       |                |           |            |           |           |           |               |           |           |           |           |           |           |           |
| Forecasting drug utilisation and expenditure in a metropolitan health region                                                                                       |                                                                   |          |                                             |                      |                    |                     |          |                                    |                                           |           |           |           |           |           |           |           |               |                          |                       |                |           |            |           |           |           |               |           |           |           |           |           |           |           |
| Issues facing the Australian health technology assessment review of medical technology funding                                                                     |                                                                   |          |                                             |                      |                    |                     |          |                                    |                                           |           |           |           |           |           |           |           |               |                          |                       |                |           |            |           |           |           |               |           |           |           |           |           |           |           |
| Evaluation criteria to assess the value of identification sources for horizon scanning                                                                             |                                                                   |          |                                             |                      |                    |                     |          |                                    |                                           |           |           |           |           |           |           |           |               |                          |                       |                |           |            |           |           |           |               |           |           |           |           |           |           |           |
| The role of horizons in identifying technologies for health technology assessment                                                                                  |                                                                   |          |                                             |                      |                    |                     |          |                                    |                                           |           |           |           |           |           |           |           |               |                          |                       |                |           |            |           |           |           |               |           |           |           |           |           |           |           |
| Information service on new and emerging health technologies: Identification and prioritisation processes for a European Union-wide newsletter                      |                                                                   |          |                                             |                      |                    |                     |          |                                    |                                           |           |           |           |           |           |           |           |               |                          |                       |                |           |            |           |           |           |               |           |           |           |           |           |           |           |
| The need for environmental horizon scanning                                                                                                                        |                                                                   |          |                                             |                      |                    |                     |          |                                    |                                           |           |           |           |           |           |           |           |               |                          |                       |                |           |            |           |           |           |               |           |           |           |           |           |           |           |
| The Italian Horizon Scanning Project                                                                                                                               |                                                                   |          |                                             |                      |                    |                     |          |                                    |                                           |           |           |           |           |           |           |           |               |                          |                       |                |           |            |           |           |           |               |           |           |           |           |           |           |           |

1  
2  
3  
4  
5  
6  
7  
8  
9  
10  
11  
12  
13  
14  
15  
16  
17  
18  
19  
20  
21  
22  
23  
24  
25  
26  
27  
28  
29  
30  
31  
32  
33  
34  
35  
36  
37  
38  
39  
40  
41  
42  
43  
44  
45  
46  
47  
48  
49  
50  
51  
52  
53  
54  
55  
56  
57  
58  
59  
60

For peer review only

| Included papers and info                                                                                                                                       |                                                                    | Information sources (proactive and passive) |                          |                      |                    |                     |         |                                     |                                           |           |           |           |                     |           |           | Time horizon | Filteration   |                          | Prioritisation           |                       | Assessment |          |         |         | Dissemination |             |             | Updating  | Review    |           |           |          |           |           |        |  |
|----------------------------------------------------------------------------------------------------------------------------------------------------------------|--------------------------------------------------------------------|---------------------------------------------|--------------------------|----------------------|--------------------|---------------------|---------|-------------------------------------|-------------------------------------------|-----------|-----------|-----------|---------------------|-----------|-----------|--------------|---------------|--------------------------|--------------------------|-----------------------|------------|----------|---------|---------|---------------|-------------|-------------|-----------|-----------|-----------|-----------|----------|-----------|-----------|--------|--|
| Title                                                                                                                                                          | Full Text Link ("-" if unavailable or estimation of non-inclusion) | Abstract                                    | Scientific literature    | Pipeline             | Patents            | Other observatories | Media   | International institutions and Fora | Individuals, Committees and expert groups |           |           |           | EU bodies           | EU bodies | EU bodies | EU bodies    | Organisations | Meetings and conferences | Other grey literature    | Criteria              | Criteria   | Method   | Factors | Depth   | Method        | Peer review | ICT         | Structure | Format    | Frequency | Audience  | Strategy | Frequency | Review    |        |  |
|                                                                                                                                                                |                                                                    |                                             | Clinical trial registers | Research information | Commercial sources | Commercial          | Medical | Survey techniques                   | EU bodies                                 | EU bodies | EU bodies | EU bodies | Academy of sciences | UKHSA     | Trade     | Trade        | Trade         | Trade                    | Meetings and conferences | Other grey literature | Criteria   | Criteria | Method  | Factors | Depth         | Method      | Peer review | ICT       | Structure | Format    | Frequency | Audience | Strategy  | Frequency | Review |  |
| Review scanning of new and emerging technologies in health care to inform health policy decisions and public funding                                           |                                                                    |                                             |                          |                      |                    |                     |         |                                     |                                           |           |           |           |                     |           |           |              |               |                          |                          |                       |            |          |         |         |               |             |             |           |           |           |           |          |           |           |        |  |
| Global trends in cardiology and cardiovascular surgery - An opportunity or a threat?                                                                           |                                                                    |                                             |                          |                      |                    |                     |         |                                     |                                           |           |           |           |                     |           |           |              |               |                          |                          |                       |            |          |         |         |               |             |             |           |           |           |           |          |           |           |        |  |
| Early identification systems for emerging zoonotic hazards                                                                                                     |                                                                    |                                             |                          |                      |                    |                     |         |                                     |                                           |           |           |           |                     |           |           |              |               |                          |                          |                       |            |          |         |         |               |             |             |           |           |           |           |          |           |           |        |  |
| Modelling downstream effects in the presence of technological change                                                                                           |                                                                    |                                             |                          |                      |                    |                     |         |                                     |                                           |           |           |           |                     |           |           |              |               |                          |                          |                       |            |          |         |         |               |             |             |           |           |           |           |          |           |           |        |  |
| Emerging health technologies: Informing and supporting health policy early                                                                                     |                                                                    |                                             |                          |                      |                    |                     |         |                                     |                                           |           |           |           |                     |           |           |              |               |                          |                          |                       |            |          |         |         |               |             |             |           |           |           |           |          |           |           |        |  |
| Invasion Science: A Horizon Scan of Emerging Challenges and Opportunities.                                                                                     |                                                                    |                                             |                          |                      |                    |                     |         |                                     |                                           |           |           |           |                     |           |           |              |               |                          |                          |                       |            |          |         |         |               |             |             |           |           |           |           |          |           |           |        |  |
| A 2017 Horizon Scan of Emerging Issues for Global Conservation and Biological Diversity                                                                        |                                                                    |                                             |                          |                      |                    |                     |         |                                     |                                           |           |           |           |                     |           |           |              |               |                          |                          |                       |            |          |         |         |               |             |             |           |           |           |           |          |           |           |        |  |
| Environmental Public Health: Tracking a cost-effective system for characterizing the sources, distribution and public health impacts of environmental hazards. |                                                                    |                                             |                          |                      |                    |                     |         |                                     |                                           |           |           |           |                     |           |           |              |               |                          |                          |                       |            |          |         |         |               |             |             |           |           |           |           |          |           |           |        |  |
| Research Priorities from Animal Behaviour for Maximising Conservation Progress.                                                                                |                                                                    |                                             |                          |                      |                    |                     |         |                                     |                                           |           |           |           |                     |           |           |              |               |                          |                          |                       |            |          |         |         |               |             |             |           |           |           |           |          |           |           |        |  |
| Platelet-rich plasma: a case study for the identification of dissemination opportunities using horizon scanning.                                               |                                                                    |                                             |                          |                      |                    |                     |         |                                     |                                           |           |           |           |                     |           |           |              |               |                          |                          |                       |            |          |         |         |               |             |             |           |           |           |           |          |           |           |        |  |
| Genomics in Public Health: Perspective from the Office of Public Health Genomics at the Centers for Disease Control and Prevention (CDC).                      |                                                                    |                                             |                          |                      |                    |                     |         |                                     |                                           |           |           |           |                     |           |           |              |               |                          |                          |                       |            |          |         |         |               |             |             |           |           |           |           |          |           |           |        |  |
| EUROSCAN INTERNATIONAL NETWORK MEMBER AGENCIES: THEIR STRUCTURE, PROCESSES, AND OUTPUTS.                                                                       |                                                                    |                                             |                          |                      |                    |                     |         |                                     |                                           |           |           |           |                     |           |           |              |               |                          |                          |                       |            |          |         |         |               |             |             |           |           |           |           |          |           |           |        |  |
| Genetic Tests for Cancer                                                                                                                                       |                                                                    |                                             |                          |                      |                    |                     |         |                                     |                                           |           |           |           |                     |           |           |              |               |                          |                          |                       |            |          |         |         |               |             |             |           |           |           |           |          |           |           |        |  |
| Quality, Regulation and Clinical Utility of Laboratory-developed Molecular Tests                                                                               |                                                                    |                                             |                          |                      |                    |                     |         |                                     |                                           |           |           |           |                     |           |           |              |               |                          |                          |                       |            |          |         |         |               |             |             |           |           |           |           |          |           |           |        |  |
| Update on Mapping the Landscape of Genetic Tests for Non-Cancer Diseases/Conditions                                                                            |                                                                    |                                             |                          |                      |                    |                     |         |                                     |                                           |           |           |           |                     |           |           |              |               |                          |                          |                       |            |          |         |         |               |             |             |           |           |           |           |          |           |           |        |  |
| The Future of Public Health: A Horizon Scan.                                                                                                                   |                                                                    |                                             |                          |                      |                    |                     |         |                                     |                                           |           |           |           |                     |           |           |              |               |                          |                          |                       |            |          |         |         |               |             |             |           |           |           |           |          |           |           |        |  |
| An horizon scan of biogeography                                                                                                                                |                                                                    |                                             |                          |                      |                    |                     |         |                                     |                                           |           |           |           |                     |           |           |              |               |                          |                          |                       |            |          |         |         |               |             |             |           |           |           |           |          |           |           |        |  |

1  
2  
3  
4  
5  
6  
7  
8  
9  
10  
11  
12  
13  
14  
15  
16  
17  
18  
19  
20  
21  
22  
23  
24  
25  
26  
27  
28  
29  
30  
31  
32  
33  
34  
35  
36  
37  
38  
39  
40  
41  
42  
43  
44  
45  
46  
47  
48  
49  
50  
51  
52  
53  
54  
55  
56  
57  
58  
59  
60

| Included papers and info                                                                                                           |                                                                   | Information sources (proactive and passive) |                          |                         |                    |                     |          |                                     |                                           |                                      |                 |               |                          |                                      |                 | Time horizon  | Filteration              |                       | Prioritisation |          | Assessment |         |       |        | Dissemination |     |           | Updating | Private Evaluation |          |          |           |        |  |
|------------------------------------------------------------------------------------------------------------------------------------|-------------------------------------------------------------------|---------------------------------------------|--------------------------|-------------------------|--------------------|---------------------|----------|-------------------------------------|-------------------------------------------|--------------------------------------|-----------------|---------------|--------------------------|--------------------------------------|-----------------|---------------|--------------------------|-----------------------|----------------|----------|------------|---------|-------|--------|---------------|-----|-----------|----------|--------------------|----------|----------|-----------|--------|--|
| Title                                                                                                                              | Full Text Link ("-" if unavailable or extension of non-inclusion) | Abstract                                    | Scientific literature    | Pipeline                | Patents            | Other observatories | Media    | International institutions and Fora | Individuals, Committees and expert groups |                                      |                 |               | EU bodies                | Start-up/entrepreneurial initiatives | Innovation hubs | Organisations | Meetings and conferences | Other grey literature | Criteria       | Criteria | Method     | Factors | Depth | Method | Peer review   | ICT | Structure | Format   | Frequency          | Audience | Strategy | Frequency | Method |  |
|                                                                                                                                    |                                                                   |                                             | Clinical trial registers | Research infrastructure | Commercial sources | Commercial          | Academic | Survey techniques                   | EU bodies                                 | Start-up/entrepreneurial initiatives | Innovation hubs | Organisations | Meetings and conferences | Other grey literature                |                 |               |                          |                       |                |          |            |         |       |        |               |     |           |          |                    |          |          |           |        |  |
| Other horizons, wider choices: horizon scanning for public health protection and improvement.                                      |                                                                   |                                             |                          |                         |                    |                     |          |                                     |                                           |                                      |                 |               |                          |                                      |                 |               |                          |                       |                |          |            |         |       |        |               |     |           |          |                    |          |          |           |        |  |
| PATIENT and PUBLIC INVOLVEMENT in EARLY AWARENESS and ALERT ACTIVITIES: AN EXAMPLE FROM THE UNITED KINGDOM                         |                                                                   |                                             |                          |                         |                    |                     |          |                                     |                                           |                                      |                 |               |                          |                                      |                 |               |                          |                       |                |          |            |         |       |        |               |     |           |          |                    |          |          |           |        |  |
| A transatlantic perspective on 20 emerging issues in biological engineering                                                        |                                                                   |                                             |                          |                         |                    |                     |          |                                     |                                           |                                      |                 |               |                          |                                      |                 |               |                          |                       |                |          |            |         |       |        |               |     |           |          |                    |          |          |           |        |  |
| The Early Warning and Alert System in History and Current Status                                                                   |                                                                   |                                             |                          |                         |                    |                     |          |                                     |                                           |                                      |                 |               |                          |                                      |                 |               |                          |                       |                |          |            |         |       |        |               |     |           |          |                    |          |          |           |        |  |
| Radix: an important tool for horizon scanning dissemination in Brazil                                                              |                                                                   |                                             |                          |                         |                    |                     |          |                                     |                                           |                                      |                 |               |                          |                                      |                 |               |                          |                       |                |          |            |         |       |        |               |     |           |          |                    |          |          |           |        |  |
| Horizon scanning in oncology: rapid scanning approach in Slovakia                                                                  |                                                                   |                                             |                          |                         |                    |                     |          |                                     |                                           |                                      |                 |               |                          |                                      |                 |               |                          |                       |                |          |            |         |       |        |               |     |           |          |                    |          |          |           |        |  |
| Climate research priorities for policy-makers, practitioners, and scientists in Georgia, USA                                       |                                                                   |                                             |                          |                         |                    |                     |          |                                     |                                           |                                      |                 |               |                          |                                      |                 |               |                          |                       |                |          |            |         |       |        |               |     |           |          |                    |          |          |           |        |  |
| Strategic foresight, leadership, and the future of rural healthcare staffing in the United States                                  |                                                                   |                                             |                          |                         |                    |                     |          |                                     |                                           |                                      |                 |               |                          |                                      |                 |               |                          |                       |                |          |            |         |       |        |               |     |           |          |                    |          |          |           |        |  |
| Toward sustainable environmental quality: identifying priority research for Latin America                                          |                                                                   |                                             |                          |                         |                    |                     |          |                                     |                                           |                                      |                 |               |                          |                                      |                 |               |                          |                       |                |          |            |         |       |        |               |     |           |          |                    |          |          |           |        |  |
| A 2018 Horizon Scan of Emerging Issues for Global Conservation and Biological Diversity                                            |                                                                   |                                             |                          |                         |                    |                     |          |                                     |                                           |                                      |                 |               |                          |                                      |                 |               |                          |                       |                |          |            |         |       |        |               |     |           |          |                    |          |          |           |        |  |
| Integrating horizon scanning and strategic risk prioritisation using a weight of evidence framework to inform policy decisions     |                                                                   |                                             |                          |                         |                    |                     |          |                                     |                                           |                                      |                 |               |                          |                                      |                 |               |                          |                       |                |          |            |         |       |        |               |     |           |          |                    |          |          |           |        |  |
| How can health systems prepare for new and emerging health technologies? The role of horizon scanning revisited                    |                                                                   |                                             |                          |                         |                    |                     |          |                                     |                                           |                                      |                 |               |                          |                                      |                 |               |                          |                       |                |          |            |         |       |        |               |     |           |          |                    |          |          |           |        |  |
| EU-EN                                                                                                                              |                                                                   |                                             |                          |                         |                    |                     |          |                                     |                                           |                                      |                 |               |                          |                                      |                 |               |                          |                       |                |          |            |         |       |        |               |     |           |          |                    |          |          |           |        |  |
| EMA Sources                                                                                                                        |                                                                   |                                             |                          |                         |                    |                     |          |                                     |                                           |                                      |                 |               |                          |                                      |                 |               |                          |                       |                |          |            |         |       |        |               |     |           |          |                    |          |          |           |        |  |
| Reviewing the effectiveness of UK drug horizon scanning efforts & the production of nice commentary along therapeutic specialities |                                                                   |                                             |                          |                         |                    |                     |          |                                     |                                           |                                      |                 |               |                          |                                      |                 |               |                          |                       |                |          |            |         |       |        |               |     |           |          |                    |          |          |           |        |  |
| The multi-criteria decision analysis in the priority setting of emerging medicines                                                 |                                                                   |                                             |                          |                         |                    |                     |          |                                     |                                           |                                      |                 |               |                          |                                      |                 |               |                          |                       |                |          |            |         |       |        |               |     |           |          |                    |          |          |           |        |  |

For peer review only

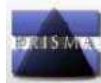

# PRISMA 2009 Checklist

| Section/topic             | #  | Checklist item                                                                                                                                                                                                                                                                                              | Reported on page # |
|---------------------------|----|-------------------------------------------------------------------------------------------------------------------------------------------------------------------------------------------------------------------------------------------------------------------------------------------------------------|--------------------|
| <b>TITLE</b>              |    |                                                                                                                                                                                                                                                                                                             |                    |
| Title                     | 1  | Identify the report as a systematic review, meta-analysis, or both.                                                                                                                                                                                                                                         | 1                  |
| <b>ABSTRACT</b>           |    |                                                                                                                                                                                                                                                                                                             |                    |
| Structured summary        | 2  | Provide a structured summary including, as applicable: background; objectives; data sources; study eligibility criteria, participants, and interventions; study appraisal and synthesis methods; results; limitations; conclusions and implications of key findings; systematic review registration number. | 3                  |
| <b>INTRODUCTION</b>       |    |                                                                                                                                                                                                                                                                                                             |                    |
| Rationale                 | 3  | Describe the rationale for the review in the context of what is already known.                                                                                                                                                                                                                              | 5                  |
| Objectives                | 4  | Provide an explicit statement of questions being addressed with reference to participants, interventions, comparisons, outcomes, and study design (PICOS).                                                                                                                                                  | 5                  |
| <b>METHODS</b>            |    |                                                                                                                                                                                                                                                                                                             |                    |
| Protocol and registration | 5  | Indicate if a review protocol exists, if and where it can be accessed (e.g., Web address), and, if available, provide registration information including registration number.                                                                                                                               | N/A                |
| Eligibility criteria      | 6  | Specify study characteristics (e.g., PICOS, length of follow-up) and report characteristics (e.g., years considered, language, publication status) used as criteria for eligibility, giving rationale.                                                                                                      | 6                  |
| Information sources       | 7  | Describe all information sources (e.g., databases with dates of coverage, contact with study authors to identify additional studies) in the search and date last searched.                                                                                                                                  | 6                  |
| Search                    | 8  | Present full electronic search strategy for at least one database, including any limits used, such that it could be repeated.                                                                                                                                                                               | 6                  |
| Study selection           | 9  | State the process for selecting studies (i.e., screening, eligibility, included in systematic review, and, if applicable, included in the meta-analysis).                                                                                                                                                   | 6-7                |
| Data collection process   | 10 | Describe method of data extraction from reports (e.g., piloted forms, independently, in duplicate) and any processes for obtaining and confirming data from investigators.                                                                                                                                  | 7                  |
| Data items                | 11 | List and define all variables for which data were sought (e.g., PICOS, funding sources) and any assumptions and                                                                                                                                                                                             | 9                  |



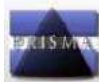

# PRISMA 2009 Checklist

1  
2  
3  
4  
5  
6  
7  
8  
9  
10  
11  
12  
13  
14  
15  
16  
17  
18  
19  
20  
21  
22  
23  
24  
25  
26  
27  
28  
29  
30  
31  
32  
33  
34  
35  
36  
37  
38  
39  
40  
41  
42  
43  
44  
45  
46  
47

simplifications made.

Risk of bias in individual studies

12

Describe methods used for assessing risk of bias of individual studies (including specification of whether this was done at the study or outcome level), and how this information is to be used in any data synthesis.

Risk of bias was assessed in accordance with the BMJ guidelines and the Cochrane risk of bias tool. Most bias were not applicable to these non-clinical qualitative studies, however the following were:

- A form of publication bias was likely in which only horizon scanning undertaken in organisations with a strong background in publishing academic publications were discovered. It was not possible to correct for this.
- Outcome bias may have occurred as the papers reported systematic methodological aspects of horizon scanning, whereas some horizon scanning may occur in an ad-hoc manner e.g. a signal discovered by word of mouth.
- The competing interests of the authors were not considered beyond the standards of the source journals. This was because it was not thought highly relevant to the reporting of methodologies.

Summary measures

13

State the principal summary measures (e.g., risk ratio, difference in means).

9

Synthesis of results

14

Describe the methods of handling data and combining results of studies, if done, including measures of consistency (e.g.,  $I^2$ ) for each meta-analysis.

9

Page 1 of 2

| Section/topic               | #  | Checklist item                                                                                                                                                  | Reported on page # |
|-----------------------------|----|-----------------------------------------------------------------------------------------------------------------------------------------------------------------|--------------------|
| Risk of bias across studies | 15 | Specify any assessment of risk of bias that may affect the cumulative evidence (e.g., publication bias, selective reporting within studies).                    | 9                  |
| Additional analyses         | 16 | Describe methods of additional analyses (e.g., sensitivity or subgroup analyses, meta-regression), if done, indicating which were pre-specified.                | N/A                |
| <b>RESULTS</b>              |    |                                                                                                                                                                 |                    |
| Study selection             | 17 | Give numbers of studies screened, assessed for eligibility, and included in the review, with reasons for exclusions at each stage, ideally with a flow diagram. | 8                  |

For any review only: <http://bmjopen.bmj.com/site/about/guidelines.xhtml>

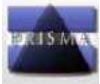

# PRISMA 2009 Checklist

1  
2  
3  
4  
5  
6  
7  
8  
9  
10  
11  
12  
13  
14  
15  
16  
17  
18  
19  
20  
21  
22  
23  
24  
25  
26  
27  
28  
29  
30  
31  
32  
33  
34  
35  
36  
37  
38  
39  
40  
41  
42  
43  
44  
45  
46  
47

|                               |    |                                                                                                                                                                                                          |                  |
|-------------------------------|----|----------------------------------------------------------------------------------------------------------------------------------------------------------------------------------------------------------|------------------|
| Study characteristics         | 18 | For each study, present characteristics for which data were extracted (e.g., study size, PICOS, follow-up period) and provide the citations.                                                             | N/A              |
| Risk of bias within studies   | 19 | Present data on risk of bias of each study and, if available, any outcome level assessment (see item 12).                                                                                                | 9 (See point 12) |
| Results of individual studies | 20 | For all outcomes considered (benefits or harms), present, for each study: (a) simple summary data for each intervention group (b) effect estimates and confidence intervals, ideally with a forest plot. | N/A              |
| Synthesis of results          | 21 | Present results of each meta-analysis done, including confidence intervals and measures of consistency.                                                                                                  | N/A              |
| Risk of bias across studies   | 22 | Present results of any assessment of risk of bias across studies (see Item 15).                                                                                                                          | 9                |
| Additional analysis           | 23 | Give results of additional analyses, if done (e.g., sensitivity or subgroup analyses, meta-regression [see Item 16]).                                                                                    | N/A              |
| <b>DISCUSSION</b>             |    |                                                                                                                                                                                                          |                  |
| Summary of evidence           | 24 | Summarize the main findings including the strength of evidence for each main outcome; consider their relevance to key groups (e.g., healthcare providers, users, and policy makers).                     | 21-22            |
| Limitations                   | 25 | Discuss limitations at study and outcome level (e.g., risk of bias), and at review-level (e.g., incomplete retrieval of identified research, reporting bias).                                            | 22               |
| Conclusions                   | 26 | Provide a general interpretation of the results in the context of other evidence, and implications for future research.                                                                                  | 23               |
| <b>FUNDING</b>                |    |                                                                                                                                                                                                          |                  |
| Funding                       | 27 | Describe sources of funding for the systematic review and other support (e.g., supply of data); role of funders for the systematic review.                                                               | 24               |

From: Moher D, Liberati A, Tetzlaff J, Altman DG, The PRISMA Group (2009). Preferred Reporting Items for Systematic Reviews and Meta-Analyses: The PRISMA Statement. PLoS Med 6(7): e1000097. doi:10.1371/journal.pmed1000097

For more information, visit: [www.prisma-statement.org](http://www.prisma-statement.org).
